# Supplementary material for: microRNA-1246 Is an Exosomal Biomarker for Aggressive Prostate Cancer
Source: Oxford University Press journal article supplement (doi:10.1158/0008-5472.can-17-2069), 2018-02-01
Supplement: 00085472can172069-sup-185977_2_supp_4531276_p36q52.xlsx [file 00085472can172069-sup-185977_2_supp_4531276_p36q52.xlsx]

## Sheet: Fold
Table S3 Dysregulated pathways in aggressive prostate cancer as compared to BPH
Biological pathway	Fold enrichment	p-value
FGFR2c ligand binding and activation	10.5024	0.00906157
adenine and adenosine salvage VI	10.5024	0.0952158
Nuclear Receptor transcription pathway	10.5024	0.0952158
Proteolytic cleavage of SNARE complex proteins	10.5024	0.000861952
BoNT Light Chain Types B, D, and F cleave VAMP/Synaptobrevin	10.5024	0.0952158
BoNT Light Chain Types A, C1, E cleave SNAP-25	10.5024	0.0952158
L-cysteine degradation II	10.5024	0.0952158
Botulinum neurotoxicity	8.40612	0.000378599
Phosphorylation of proteins involved in G1/S transition by active Cyclin E:Cdk2 complexes	7.88335	0.00320196
Autointegration results in viral DNA circles	7.01323	0.0254608
Class IB PI3K non-lipid kinase events	7.01323	0.0254608
Stimulation of the cell death response by PAK-2p34	7.01323	0.0254608
Receptor-ligand binding initiates the second proteolytic cleavage of Notch receptor	7.00549	4.81881e-05
Notch receptor binds with a ligand	6.56892	0.00034074
Glutamate Neurotransmitter Release Cycle	5.73292	0.000223912
Activation of Na-permeable Kainate Receptors	5.27733	0.18137
FGFR3 ligand binding and activation	5.27733	0.18137
phospho-PLA2 pathway	5.27733	0.18137
glycine biosynthesis I	5.27733	0.18137
ERK2 activation	5.27733	0.18137
cysteine biosynthesis/homocysteine degradation	5.27733	0.18137
D-myo-inositol (3,4,5,6)-tetrakisphosphate biosynthesis	5.27733	0.18137
Translocation of BoNT Light chain	5.27733	0.18137
Regulation of PAK-2p34 activity by PS-GAP/RHG10	5.27733	0.18137
Astrocytic Glutamate-Glutamine Uptake And Metabolism	5.27733	0.18137
dolichol and dolichyl phosphate biosynthesis	5.27733	0.18137
spermidine biosynthesis	5.27733	0.18137
spermine biosynthesis	5.27733	0.18137
pyridoxal 5'-phosphate salvage pathway	5.27733	0.18137
FGFR3c ligand binding and activation	5.27733	0.18137
FGFR4 ligand binding and activation	5.27733	0.18137
Ionotropic activity of Kainate Receptors	5.27733	0.18137
Reactions specific to the complex N-glycan synthesis pathway	5.27733	0.18137
Neurotransmitter uptake and Metabolism In Glial Cells	5.27733	0.18137
DNA Damage Recognition in GG-NER	5.27733	0.18137
FGFR3b ligand binding and activation	5.27733	0.18137
Inhibition of Insulin Secretion by Adrenaline/Noradrenaline	5.27733	0.18137
FGFR1c ligand binding and activation	5.27733	0.18137
Vitamins B6 activation to pyridoxal phosphate	5.27733	0.18137
Polyamines are oxidized to amines, aldehydes and H2O2 by PAOs	5.27733	0.18137
Viral RNP Complexes in the Host Cell Nucleus	5.27733	0.18137
Mature Notch receptor traffics to plasma membrane	5.2643	0.0477197
MRN complex relocalizes to nuclear foci	5.2643	0.0477197
Transport of Notch receptor precursor to golgi	5.2643	0.0477197
Assembly of the RAD50-MRE11-NBS1 complex at DNA double-strand breaks	5.2643	0.0477197
Vitamin B1 (thiamin) metabolism	5.2643	0.0477197
ERK activation	5.25994	0.0138243
Interleukin-6 signaling	5.25776	0.00418819
Role of second messengers in netrin-1 signaling	5.25645	0.00130214
Rap1 signalling	5.25645	0.00130214
FRS2-mediated cascade	4.90485	0.000226693
GRB2 events in EGFR signaling	4.90485	0.000226693
SHC-mediated signalling	4.85161	0.000703111
RAF/MAP kinase cascade	4.77902	0.00220066
Neurofascin interactions	4.67421	0.0069736
Serotonin Neurotransmitter Release Cycle	4.67421	0.0069736
Effects of Botulinum toxin	4.67421	0.0069736
Dopamine Neurotransmitter Release Cycle	4.67421	0.0069736
Regulation of KIT signaling	4.67421	0.0069736
SHC1 events in EGFR signaling	4.59849	0.000369944
FGFR2b ligand binding and activation	4.50959	0.0224941
NrCAM interactions	4.50959	0.0224941
Activation of BAD and translocation to mitochondria	4.50959	0.0224941
Zinc efflux and compartmentalization by the SLC30 family	4.50959	0.0224941
FGFR2 ligand binding and activation	4.50959	0.0224941
MEK activation	4.50959	0.0224941
RAF phosphorylates MEK	4.50959	0.0224941
RSK activation	4.50959	0.0224941
gamma-linolenate biosynthesis II (animals)	4.50959	0.0224941
inositol pyrophosphates biosynthesis	4.50959	0.0224941
G0 and Early G1	4.50389	6.40724e-05
SMAC-mediated dissociation of IAP:caspase complexes	4.21354	0.0745748
CREB phosphorylation through the activation of Adenylate Cyclase	4.21354	0.0745748
RAF activation	4.21354	0.0745748
folate polyglutamylation	4.21354	0.0745748
SMAC-mediated apoptotic response	4.21354	0.0745748
SMAC binds to IAPs	4.21354	0.0745748
NGF-independant TRKA activation	4.21354	0.0745748
Activation of CaMK IV	4.21354	0.0745748
CaMK IV-mediated phosphorylation of CREB	4.21354	0.0745748
APOBEC3G mediated resistance to HIV-1 infection	4.21354	0.0745748
Maturation of Notch precursor via proteolytic cleavage	4.21354	0.0745748
Netrin mediated repulsion signals	4.20516	0.00173495
SOS-mediated signalling	4.20516	0.00173495
Role of DCC in regulating apoptosis	3.9466	0.0334776
Sema4D mediated inhibition of cell attachment and migration	3.9466	0.0334776
SHC-related events	3.9425	0.00255395
Frs2-mediated activation	3.8728	0.00126146
Caspase-mediated cleavage of cytoskeletal proteins	3.82513	0.0156425
Norepinephrine Neurotransmitter Release Cycle	3.82513	0.0156425
Acetylcholine Neurotransmitter Release Cycle	3.82513	0.0156425
Thrombin signalling through proteinase activated receptors (PARs)	3.71073	0.00363208
GABA synthesis, release, reuptake and degradation	3.71073	0.00363208
Effects of PIP2 hydrolysis	3.67925	0.00178252
Prolonged ERK activation events	3.67925	0.00178252
Binding of RNA by Insulin-like Growth Factor-2 mRNA Binding Proteins (IGF2BPs/IMPs/VICKZs)	3.52406	0.259325
Regulation of Insulin Secretion by Acetylcholine	3.52406	0.259325
D-myo-inositol (1,4,5,6)-tetrakisphosphate biosynthesis	3.52406	0.259325
ERK1 activation	3.52406	0.259325
BH3-only proteins associate with and inactivate anti-apoptotic BCL-2 members	3.52406	0.259325
Adrenaline signalling through Alpha-2 adrenergic receptor	3.52406	0.259325
Ephrin A reverse signaling	3.52406	0.259325
tetrahydrobiopterin biosynthesis II	3.52406	0.259325
AlphaE beta7 integrin cell surface interactions	3.52406	0.259325
FGFR1c and Klotho ligand binding and activation	3.52406	0.259325
Arachidonate production from DAG	3.52406	0.259325
Transport of fatty acids	3.52406	0.259325
G2 Phase	3.52406	0.259325
ERKs are inactivated	3.52406	0.259325
tetrahydrobiopterin biosynthesis I	3.52406	0.259325
Creatine metabolism	3.52406	0.259325
Interconversion of polyamines	3.52406	0.259325
AKT-mediated inactivation of FOXO1A	3.52406	0.259325
1D-myo-inositol hexakisphosphate biosynthesis V (from Ins(1,3,4)P3)	3.52406	0.259325
fatty acid activation	3.51245	0.10495
chondroitin and dermatan biosynthesis	3.51245	0.10495
Molybdenum cofactor biosynthesis	3.51245	0.10495
ADP signalling through P2Y purinoceptor 12	3.51245	0.10495
CREB phosphorylation through the activation of CaMKK	3.51245	0.10495
acetyl-CoA biosynthesis (from pyruvate)	3.51245	0.10495
FGFR1b ligand binding and activation	3.51245	0.10495
Elevation of cytosolic Ca2+ levels	3.51245	0.10495
SHC-mediated cascade	3.51245	0.10495
Activation of TRKA receptors	3.51245	0.10495
Regulation of pyruvate dehydrogenase (PDH) complex	3.50857	0.0467297
Bicarbonate transporters	3.50857	0.0467297
chondroitin sulfate biosynthesis (late stages)	3.50663	0.0217245
PAR4-mediated thrombin signaling events	3.50547	0.0103533
Sema3A PAK dependent Axon repulsion	3.50547	0.0103533
Signaling by Notch	3.50413	0.00245622
Signalling to RAS	3.50413	0.00245622
FGF signaling pathway	3.50226	5.00633e-06
Trk receptor signaling mediated by PI3K and PLC-gamma	3.33523	8.20892e-07
CRMPs in Sema3A signaling	3.28651	0.0138985
Signalling to p38 via RIT and RIN	3.28651	0.0138985
mRNA Decay by 5' to 3' Exoribonuclease	3.2371	0.029063
Neurotransmitter Release Cycle	3.2343	0.00216917
RXR and RAR heterodimerization with other nuclear receptor	3.2343	0.00216917
NCAM1 interactions	3.19956	0.00437209
BMAL1:CLOCK/NPAS2 Activates Gene Expression	3.19956	0.00437209
Dissolution of Fibrin Clot	3.15807	0.0621475
Pyruvate metabolism	3.15807	0.0621475
GRB2:SOS provides linkage to MAPK signaling for Intergrins	3.15807	0.0621475
chondroitin sulfate biosynthesis	3.1544	0.00887384
Signalling to ERKs	3.15317	0.00141673
NCAM signaling for neurite out-growth	3.13359	1.38379e-05
Sema4D in semaphorin signaling	3.11456	0.00282855
RNA Polymerase III Transcription Termination	3.0933	0.0181762
Zinc transporters	3.0933	0.0181762
Netrin-1 signaling	3.03569	0.000200677
E2F transcription factor network	3.02226	2.66159e-06
Nectin/Necl trans heterodimerization	3.01139	0.137932
2-LTR circle formation	3.01139	0.137932
Pyrimidine salvage reactions	3.01139	0.137932
glycoaminoglycan-protein linkage region biosynthesis	3.01139	0.137932
Purine salvage	3.01139	0.137932
FGFR1 ligand binding and activation	3.01139	0.137932
PECAM1 interactions	3.01139	0.137932
Apoptotic factor-mediated response	3.01139	0.137932
CREB phosphorylation	3.01139	0.137932
Interleukin receptor SHC signaling	3.01139	0.137932
SEMA3A-Plexin repulsion signaling by inhibiting Integrin adhesion	3.00604	0.0376959
S1P4 pathway	3.00604	0.0376959
Signal transduction by L1	3.00283	0.00118426
NOTCH	2.94937	5.62449e-05
ARMS-mediated activation	2.92155	0.0232384
Reelin signaling pathway	2.89984	0.00460641
EPHB forward signaling	2.89006	0.000968199
NICD traffics to nucleus	2.87123	0.0795869
Notch-HLH transcription pathway	2.87123	0.0795869
CDC6 association with the ORC:origin complex	2.87123	0.0795869
Nongenotropic Androgen signaling	2.83052	0.0091114
D-myo-inositol (1,3,4)-trisphosphate biosynthesis	2.80577	0.0476387
Trk receptor signaling mediated by the MAPK pathway	2.78232	0.00366788
Activation of NMDA receptor upon glutamate binding and postsynaptic events	2.78232	0.00366788
Post NMDA receptor activation events	2.78232	0.00366788
Signaling by BMP	2.76786	0.0291284
Signaling events mediated by PRL	2.74313	0.0180611
heparan sulfate biosynthesis	2.74313	0.0180611
Apoptotic cleavage of cellular proteins	2.69493	0.00288596
Axon guidance	2.6859	3.78655e-12
Regulation of Commissural axon pathfinding by Slit and Robo	2.64524	0.32986
Reuptake of GABA	2.64524	0.32986
myo-inositol biosynthesis	2.64524	0.32986
glucose and glucose-1-phosphate degradation	2.64524	0.32986
pentose phosphate pathway (oxidative branch)	2.64524	0.32986
Carnitine synthesis	2.64524	0.32986
superpathway of serine and glycine biosynthesis I	2.64524	0.32986
betaKlotho-mediated ligand binding	2.64524	0.32986
Breakdown of the nuclear lamina	2.64524	0.32986
GDP-glucose biosynthesis	2.64524	0.32986
glycerol degradation IV	2.64524	0.32986
AKT phosphorylates targets in the nucleus	2.64524	0.32986
Amine Oxidase reactions	2.64524	0.32986
branched-chain alpha-keto acid dehydrogenase complex	2.64524	0.32986
2-ketoglutarate dehydrogenase complex	2.64524	0.32986
Prostacyclin signalling through prostacyclin receptor	2.64524	0.32986
G2/M DNA replication checkpoint	2.64524	0.32986
spermine and spermidine degradation I	2.64524	0.32986
Apoptosis induced DNA fragmentation	2.63544	0.172751
A third proteolytic cleavage releases NICD	2.63544	0.172751
Activation of DNA fragmentation factor	2.63544	0.172751
TRAF6 mediated IRF7 activation in TLR7/8 or 9 signaling	2.63544	0.172751
Rho GTPase cycle	2.63544	0.172751
S1P5 pathway	2.63544	0.172751
Activation of Rac	2.63544	0.172751
cysteine biosynthesis III (mammalia)	2.63544	0.172751
Activation of Kainate Receptors upon glutamate binding	2.63544	0.172751
Metabolism of folate and pterines	2.63544	0.172751
Lysosphingolipid and LPA receptors	2.63544	0.172751
Inactivation of Cdc42 and Rac	2.63544	0.172751
Recruitment of repair and signaling proteins to double-strand breaks	2.63544	0.172751
Thromboxane signalling through TP receptor	2.63544	0.172751
Signaling by Rho GTPases	2.63544	0.172751
Integration of provirus	2.63544	0.172751
N-glycan antennae elongation in the medial/trans-Golgi	2.63216	0.0988744
stearate biosynthesis I (animals)	2.63216	0.0988744
Apoptotic cleavage of cell adhesion proteins	2.63216	0.0988744
Interaction between L1 and Ankyrins	2.63216	0.0988744
Regulation of Insulin Secretion by Glucagon-like Peptide-1	2.63052	0.0588855
heparan sulfate biosynthesis (late stages)	2.63052	0.0588855
Signaling by NODAL	2.63052	0.0588855
Destabilization of mRNA by Butyrate Response Factor 1 (BRF1)	2.62954	0.0358799
superpathway of D-myo-inositol (1,4,5)-trisphosphate metabolism	2.62954	0.0358799
IL2 signaling events mediated by STAT5	2.62841	0.0138691
Interleukin-2 signaling	2.62841	0.0138691
CREB phosphorylation through the activation of Ras	2.62841	0.0138691
Apoptotic execution phase	2.62724	0.00144508
Neurotrophic factor-mediated Trk receptor signaling	2.60039	6.2941e-06
Syndecan-2-mediated signaling events	2.59253	8.25871e-05
Downstream signaling of activated FGFR	2.54724	0.000364874
VEGFR1 specific signals	2.53781	0.0168164
Sphingolipid metabolism	2.53781	0.0168164
EGFR interacts with phospholipase C-gamma	2.53781	0.0168164
Metal ion SLC transporters	2.52377	0.026911
Presenilin action in Notch and Wnt signaling	2.51318	0.003285
p38 signaling mediated by MAPKAP kinases	2.50438	0.0435171
E-cadherin signaling in keratinocytes	2.50438	0.0435171
Negative regulation of FGFR signaling	2.47588	0.0714114
Destabilization of mRNA by Tristetraprolin (TTP)	2.47588	0.0714114
dermatan sulfate biosynthesis	2.47588	0.0714114
Semaphorin interactions	2.46276	0.000806504
Retinoic acid receptors-mediated signaling	2.45972	0.00392668
Notch-mediated HES/HEY network	2.45887	5.60005e-05
Notch signaling pathway	2.45887	5.60005e-05
PLC-gamma1 signalling	2.45324	0.0201794
G-protein activation	2.42984	0.119818
D-myo-inositol (1,4,5)-trisphosphate degradation	2.42984	0.119818
Signaling events mediated by Stem cell factor receptor (c-Kit)	2.42519	0.00299827
Regulation of Insulin Secretion	2.40849	0.00466445
Deadenylation of mRNA	2.3906	0.0520544
MicroRNA (miRNA) Biogenesis	2.3906	0.0520544
G alpha (z) signalling events	2.3906	0.0520544
Sema4D induced cell migration and growth-cone collapse	2.3906	0.0520544
Regulatory RNA pathways	2.3906	0.0520544
Signaling by SCF-KIT	2.38814	0.00113194
Cyclin D associated events in G1	2.37413	0.0239839
G alpha (s) signalling events	2.37413	0.0239839
G1 Phase	2.37413	0.0239839
Vpr-mediated nuclear import of PICs	2.37413	0.0239839
Signaling by EGFR	2.35851	0.000108738
p38MAPK events	2.34293	0.208757
Nef mediated downregulation of MHC class I complex cell surface expression	2.34293	0.208757
Regulated proteolysis of p75NTR	2.34293	0.208757
Role of Abl in Robo-Slit signaling	2.34293	0.208757
N-Glycan antennae elongation	2.34293	0.208757
Sodium/Calcium exchangers	2.34293	0.208757
DARPP-32 events	2.3384	0.0851751
DAG and IP3 signaling	2.33689	0.0382339
Phospholipase C-mediated cascade	2.33689	0.0382339
Ca-dependent events	2.33689	0.0382339
PI-3K cascade	2.33689	0.0382339
Signaling by FGFR	2.32245	0.000194324
GAB1 signalosome	2.29996	0.0282532
Netrin-mediated signaling events	2.29996	0.0282532
ErbB4 signaling events	2.29996	0.0282532
Circadian Clock	2.29996	0.0282532
Signaling by Robo receptor	2.2867	0.061497
CXCR3-mediated signaling events	2.27301	0.0209797
L1CAM interactions	2.26105	0.0010533
ID	2.25641	0.142215
FGFR ligand binding and activation	2.25641	0.142215
Synthesis of very long-chain fatty acyl-CoAs	2.25641	0.142215
guanosine nucleotides de novo biosynthesis	2.25641	0.142215
pyrimidine deoxyribonucleotides de novo biosynthesis	2.25641	0.142215
Transport to the Golgi and subsequent modification	2.25346	0.0448788
Fc-epsilon receptor I signaling in mast cells	2.23957	0.00429323
Regulation of retinoblastoma protein	2.22904	0.00324452
3-phosphoinositide degradation	2.21539	0.100121
Generation of second messenger molecules	2.21539	0.100121
Glucose transport	2.21321	0.0244236
Purine metabolism	2.19146	0.0718409
Alpha6Beta4Integrin	2.18973	0.0135497
Opioid Signalling	2.18131	0.0101435
Insulin-mediated glucose transport	2.17578	0.0521995
S1P3 pathway	2.17578	0.0521995
Interleukin-3, 5 and GM-CSF signaling	2.17578	0.0521995
Transmission across Chemical Synapses	2.17061	0.000158572
EPO signaling pathway	2.16471	0.0382684
Interactions of Vpr with host cellular proteins	2.16471	0.0382684
PLC beta mediated events	2.15648	0.028244
Signaling by PDGF	2.15541	0.00246422
FoxO family signaling	2.14505	0.0156117
Posttranslational regulation of adherens junction stability and dissassembly	2.13722	4.3017e-07
Integrins in angiogenesis	2.13461	0.00657563
Regulation of gene expression in endocrine-committed (NEUROG3+) progenitor cells	2.11725	0.393681
superoxide radicals degradation	2.11725	0.393681
pyruvate fermentation to lactate	2.11725	0.393681
Recognition and association of DNA glycosylase with site containing an affected pyrimidine	2.11725	0.393681
CTLA4 inhibitory signaling	2.11725	0.393681
Activation, myristolyation of BID and translocation to mitochondria	2.11725	0.393681
Cleavage of the damaged pyrimidine	2.11725	0.393681
Aurora C signaling	2.11725	0.393681
PLK3 signaling events	2.11725	0.393681
G beta:gamma signalling through PLC beta	2.11725	0.393681
Sodium-coupled phosphate cotransporters	2.11725	0.393681
GABA A receptor activation	2.11725	0.393681
Glyoxylate metabolism	2.11725	0.393681
Negative regulation of the PI3K/AKT network	2.11725	0.393681
Synthesis of GDP-mannose	2.11725	0.393681
Cytochrome c-mediated apoptotic response	2.11725	0.393681
CHL1 interactions	2.11725	0.393681
Depyrimidination	2.11725	0.393681
PKA-mediated phosphorylation of key metabolic factors	2.11725	0.393681
Activation of caspases through apoptosome-mediated cleavage	2.11725	0.393681
Chk1/Chk2(Cds1) mediated inactivation of Cyclin B:Cdk1 complex	2.11725	0.393681
p130Cas linkage to MAPK signaling for integrins	2.10887	0.245409
ADP signalling through P2Y purinoceptor 1	2.10887	0.245409
IRAK1 recruits IKK complex upon TLR7/8 or 9 stimulation	2.10887	0.245409
DCC mediated attractive signaling	2.10887	0.245409
Zinc influx into cells by the SLC39 gene family	2.10887	0.245409
IRAK1 recruits IKK complex	2.10887	0.245409
Nuclear Events (kinase and transcription factor activation)	2.10608	0.165859
Lysosome Vesicle Biogenesis	2.10608	0.165859
CREB phosphorylation through the activation of CaMKII	2.10608	0.165859
G1/S-Specific Transcription	2.10608	0.165859
1D-myo-inositol hexakisphosphate biosynthesis II (mammalian)	2.10608	0.165859
Sumoylation by RanBP2 regulates transcriptional repression	2.10608	0.165859
Association of licensing factors with the pre-replicative complex	2.10608	0.165859
PKA-mediated phosphorylation of CREB	2.10468	0.116181
Calmodulin induced events	2.10384	0.0830733
VEGFR3 signaling in lymphatic endothelium	2.10384	0.0830733
CaM pathway	2.10384	0.0830733
MAP kinase activation in TLR cascade	2.10328	0.0602045
G-protein mediated events	2.10258	0.0324579
Hexose transport	2.10258	0.0324579
Downstream signal transduction	2.1016	0.00426761
E-cadherin signaling events	2.06327	1.58466e-07
E-cadherin signaling in the nascent adherens junction	2.0626	2.0711e-07
Stabilization and expansion of the E-cadherin adherens junction	2.0626	2.0711e-07
Deadenylation-dependent mRNA decay	2.05665	0.0274559
N-cadherin signaling events	2.05061	8.92185e-07
Intrinsic Pathway for Apoptosis	2.03545	0.0688974
Export of Viral Ribonucleoproteins from Nucleus	2.03545	0.0688974
EPHA forward signaling	2.03545	0.0688974
AndrogenReceptor	2.02078	0.00624323
TGFBR	2.01714	0.000660107
Metabolism of vitamins and cofactors	2.01291	0.0311879
TCR signaling	2.01291	0.0311879
Metabolism of water-soluble vitamins and cofactors	2.01291	0.0311879
p75(NTR)-mediated signaling	2.00655	6.30358e-05
G alpha (12/13) signalling events	2.0045	0.133279
ALK1 signaling events	1.99605	1.17715e-07
ALK1 pathway	1.97757	1.65655e-07
Circadian rhythm pathway	1.97453	0.190545
Spry regulation of FGF signaling	1.97453	0.190545
Platelet calcium homeostasis	1.97453	0.190545
Hedgehog	1.97453	0.190545
Other semaphorin interactions	1.97453	0.190545
Glucagon-type ligand receptors	1.97453	0.190545
LPA4-mediated signaling events	1.97453	0.190545
Signal amplification	1.97453	0.190545
Recycling pathway of L1	1.97187	0.0782768
Validated nuclear estrogen receptor alpha network	1.97053	0.0165307
NGF signalling via TRKA from the plasma membrane	1.96386	0.00249196
ATF-2 transcription factor network	1.95952	0.022065
EphrinA-EPHA pathway	1.95592	0.0476036
Adherens junctions interactions	1.94806	0.108115
KitReceptor	1.94647	0.0295379
Regulation of nuclear beta catenin signaling and target gene transcription	1.94552	0.000895032
Androgen-mediated signaling	1.93956	0.00117313
Regulation of nuclear SMAD2/3 signaling	1.92859	1.20632e-06
Regulation of cytoplasmic and nuclear SMAD2/3 signaling	1.92859	1.20632e-06
TGF-beta receptor signaling	1.92859	1.20632e-06
EphrinB-EPHB pathway	1.92687	0.0247704
Unblocking of NMDA receptor, glutamate binding and activation	1.91733	0.282258
Early Phase of HIV Life Cycle	1.91733	0.282258
Signal regulatory protein (SIRP) family interactions	1.91733	0.282258
Signaling mediated by p38-gamma and p38-delta	1.91733	0.282258
purine nucleotides de novo biosynthesis II	1.91733	0.282258
Purine catabolism	1.91733	0.282258
HIF-1-alpha transcription factor network	1.91083	0.0207932
Developmental Biology	1.89647	2.1952e-08
Regulation of RAC1 activity	1.89598	0.000106533
RhoA signaling pathway	1.89598	0.000106533
Regulation of RhoA activity	1.89598	0.000106533
RAC1 signaling pathway	1.89598	0.000106533
Signaling mediated by p38-alpha and p38-beta	1.89216	0.04446
LPA receptor mediated events	1.89129	0.00601095
Neurotransmitter Receptor Binding And Downstream Transmission In The Postsynaptic Cell	1.88904	0.00937185
Voltage gated Potassium channels	1.88726	0.0725801
p73 transcription factor network	1.88615	0.0146938
E2F mediated regulation of DNA replication	1.87851	0.121862
Signaling events mediated by HDAC Class I	1.8596	0.00477099
Beta5 beta6 beta7 and beta8 integrin cell surface interactions	1.85845	0.216073
Syndecan-3-mediated signaling events	1.85845	0.216073
PKA activation in glucagon signalling	1.85845	0.216073
Activation of BH3-only proteins	1.85845	0.216073
RNA Polymerase III Transcription	1.85591	0.0990653
IL8- and CXCR2-mediated signaling events	1.85591	0.0990653
RNA Polymerase III Abortive And Retractive Initiation	1.85591	0.0990653
Neuronal System	1.84397	0.000413403
Hypoxic and oxygen homeostasis regulation of HIF-1-alpha	1.839	0.018126
Validated targets of C-MYC transcriptional repression	1.83513	0.0343215
Canonical Wnt signaling pathway	1.83001	0.00148673
Signaling events regulated by Ret tyrosine kinase	1.82776	0.0286434
Signaling by Interleukins	1.82745	0.0127879
Caspase cascade in apoptosis	1.81939	0.0551403
Epithelial-to-mesenchymal transition	1.8171	0.000651795
Validated targets of C-MYC transcriptional activation	1.8163	0.020055
Regulation of Glucokinase by Glucokinase Regulatory Protein	1.81376	0.136375
Ion transport by P-type ATPases	1.81376	0.136375
NEP/NS2 Interacts with the Cellular Export Machinery	1.81376	0.136375
Transport of Ribonucleoproteins into the Host Nucleus	1.81376	0.136375
a6b1 and a6b4 Integrin signaling	1.8029	0.110448
Generic Transcription Pathway	1.8029	0.110448
phosphatidylethanolamine biosynthesis II	1.76496	0.451427
Vitamin C (ascorbate) metabolism	1.76496	0.451427
Coenzyme A biosynthesis	1.76496	0.451427
Klotho-mediated ligand binding	1.76496	0.451427
GDP-mannose biosynthesis	1.76496	0.451427
Interleukin-1 processing	1.76496	0.451427
Regulation of signaling by CBL	1.76496	0.451427
Telomere Extension By Telomerase	1.76496	0.451427
Release of eIF4E	1.76496	0.451427
ATM mediated phosphorylation of repair proteins	1.76496	0.451427
Regulation of gene expression in early pancreatic precursor cells	1.76496	0.451427
Presynaptic function of Kainate receptors	1.76496	0.451427
Pyrimidine biosynthesis	1.76496	0.451427
Regulation of gene expression in late stage (branching morphogenesis) pancreatic bud precursor cells	1.76496	0.451427
ATM mediated response to DNA double-strand break	1.76496	0.451427
Cyclin B2 mediated events	1.76496	0.451427
methionine degradation I (to homocysteine)	1.76496	0.451427
C-MYC pathway	1.76274	0.00365549
RNA Polymerase III Chain Elongation	1.75769	0.318935
Hormone-sensitive lipase (HSL)-mediated triacylglycerol hydrolysis	1.75769	0.318935
ERK/MAPK targets	1.75769	0.318935
Tie2 Signaling	1.75526	0.242253
CD28 dependent Vav1 pathway	1.75526	0.242253
Fatty Acyl-CoA Biosynthesis	1.75526	0.242253
Nuclear import of Rev protein	1.75332	0.151609
Ras signaling in the CD4+ TCR pathway	1.75248	0.0997572
Hedgehog signaling events mediated by Gli proteins	1.75222	0.0817716
Regulation of CDC42 activity	1.75051	1.69815e-10
CDC42 signaling events	1.73892	4.32077e-10
Wnt signaling network	1.73334	0.00125135
Noncanonical Wnt signaling pathway	1.73165	0.00206117
ErbB receptor signaling network	1.72638	2.46912e-16
Plasma membrane estrogen receptor signaling	1.71541	8.30953e-16
AP-1 transcription factor network	1.70826	5.36248e-08
Nectin adhesion pathway	1.70712	1.95881e-15
IGF1 pathway	1.70426	2.76003e-15
Integrin-linked kinase signaling	1.70236	3.0038e-08
Signaling events mediated by Hepatocyte Growth Factor Receptor (c-Met)	1.70162	3.25895e-15
Regulation of Telomerase	1.70021	0.0555363
Internalization of ErbB1	1.70007	4.22071e-15
Arf6 trafficking events	1.70007	4.22071e-15
S1P1 pathway	1.70007	4.22071e-15
EGF receptor (ErbB1) signaling pathway	1.70007	4.22071e-15
Class I PI3K signaling events	1.70007	4.22071e-15
Arf6 signaling events	1.70007	4.22071e-15
Insulin Pathway	1.70007	4.22071e-15
ErbB1 downstream signaling	1.70007	4.22071e-15
Class I PI3K signaling events mediated by Akt	1.70007	4.22071e-15
Signaling events mediated by focal adhesion kinase	1.70007	4.22071e-15
mTOR signaling pathway	1.70007	4.22071e-15
Urokinase-type plasminogen activator (uPA) and uPAR-mediated signaling	1.70007	4.22071e-15
PDGFR-beta signaling pathway	1.70007	4.22071e-15
Arf6 downstream pathway	1.70007	4.22071e-15
EGFR-dependent Endothelin signaling events	1.69875	4.58436e-15
LKB1 signaling events	1.69816	2.9382e-15
IFN-gamma pathway	1.69767	4.17659e-15
Lissencephaly gene (LIS1) in neuronal migration and development	1.69678	0.167515
Pyruvate metabolism and Citric Acid (TCA) cycle	1.69678	0.167515
IL5-mediated signaling events	1.69479	5.86888e-15
GMCSF-mediated signaling events	1.69479	5.86888e-15
PAR1-mediated thrombin signaling events	1.69374	5.34522e-15
PDGF receptor signaling network	1.69348	6.3706e-15
Syndecan-1-mediated signaling events	1.69244	5.8016e-15
Thrombin/protease-activated receptor (PAR) pathway	1.69244	5.8016e-15
IL3-mediated signaling events	1.69086	7.50294e-15
Signaling events mediated by VEGFR1 and VEGFR2	1.68955	8.14062e-15
TRAIL signaling pathway	1.68838	3.98327e-15
VEGF and VEGFR signaling network	1.68723	8.03924e-15
Alpha9 beta1 integrin signaling events	1.68594	8.719e-15
Glypican 1 network	1.68564	1.03881e-14
Nephrin/Neph1 signaling in the kidney podocyte	1.68391	0.210272
Endothelins	1.68335	1.02512e-14
Glypican 3 network	1.68285	0.00206438
Sphingosine 1-phosphate (S1P) pathway	1.6782	1.4145e-14

## Sheet: Chart
Biological pathway	Percentage of genes	p-value	p = 0.05 reference
ErbB receptor signaling network	11.7422	15.6075	1.30103
Plasma membrane estrogen receptor signaling	11.5784	15.0804	1.30103
Nectin adhesion pathway	11.4691	14.708	1.30103
IGF1 pathway	11.4145	14.5591	1.30103
LKB1 signaling events	11.5238	14.5319	1.30103
Signaling events mediated by Hepatocyte Growth Factor Receptor (c-Met)	11.4145	14.4869	1.30103
TRAIL signaling pathway	11.633	14.3998	1.30103
IFN-gamma pathway	11.4145	14.3792	1.30103
Arf6 trafficking events	11.3599	14.3746	1.30103
S1P1 pathway	11.3599	14.3746	1.30103
EGF receptor (ErbB1) signaling pathway	11.3599	14.3746	1.30103
Urokinase-type plasminogen activator (uPA) and uPAR-mediated signaling	11.3599	14.3746	1.30103
PDGFR-beta signaling pathway	11.3599	14.3746	1.30103
Class I PI3K signaling events	11.3599	14.3746	1.30103
ErbB1 downstream signaling	11.3599	14.3746	1.30103
Class I PI3K signaling events mediated by Akt	11.3599	14.3746	1.30103
Internalization of ErbB1	11.3599	14.3746	1.30103
Arf6 downstream pathway	11.3599	14.3746	1.30103
mTOR signaling pathway	11.3599	14.3746	1.30103
Signaling events mediated by focal adhesion kinase	11.3599	14.3746	1.30103
Insulin Pathway	11.3599	14.3746	1.30103
Arf6 signaling events	11.3599	14.3746	1.30103
EGFR-dependent Endothelin signaling events	11.3599	14.3387	1.30103
PAR1-mediated thrombin signaling events	11.4145	14.272	1.30103
Syndecan-1-mediated signaling events	11.4145	14.2365	1.30103
Thrombin/protease-activated receptor (PAR) pathway	11.4145	14.2365	1.30103
GMCSF-mediated signaling events	11.3599	14.2314	1.30103
IL5-mediated signaling events	11.3599	14.2314	1.30103
PDGF receptor signaling network	11.3599	14.1958	1.30103
IL3-mediated signaling events	11.3599	14.1248	1.30103
VEGF and VEGFR signaling network	11.4145	14.0948	1.30103
Signaling events mediated by VEGFR1 and VEGFR2	11.3599	14.0893	1.30103
Alpha9 beta1 integrin signaling events	11.4145	14.0595	1.30103
Glypican pathway	11.633	14.0492	1.30103
Endothelins	11.4145	13.9892	1.30103
Glypican 1 network	11.3599	13.9835	1.30103
Sphingosine 1-phosphate (S1P) pathway	11.4145	13.8494	1.30103
Proteoglycan syndecan-mediated signaling events	11.633	13.8075	1.30103
Integrin family cell surface interactions	11.7968	13.5268	1.30103
Beta1 integrin cell surface interactions	11.5784	13.3249	1.30103
Axon guidance	3.05844	11.4218	1.30103
Regulation of CDC42 activity	6.99072	9.77002	1.30103
CDC42 signaling events	6.82687	9.36444	1.30103
Developmental Biology	4.25997	7.65853	1.30103
Integrin-linked kinase signaling	5.78919	7.52233	1.30103
AP-1 transcription factor network	5.51611	7.27063	1.30103
ALK1 signaling events	3.33151	6.92917	1.30103
E-cadherin signaling events	3.00382	6.80006	1.30103
ALK1 pathway	3.33151	6.78079	1.30103
Stabilization and expansion of the E-cadherin adherens junction	2.94921	6.6838	1.30103
E-cadherin signaling in the nascent adherens junction	2.94921	6.6838	1.30103
Posttranslational regulation of adherens junction stability and dissassembly	2.5669	6.36636	1.30103
Trk receptor signaling mediated by PI3K and PLC-gamma	1.0923	6.08571	1.30103
N-cadherin signaling events	2.67613	6.04955	1.30103
Regulation of nuclear SMAD2/3 signaling	3.05844	5.91854	1.30103
Regulation of cytoplasmic and nuclear SMAD2/3 signaling	3.05844	5.91854	1.30103
TGF-beta receptor signaling	3.05844	5.91854	1.30103
E2F transcription factor network	1.14691	5.57486	1.30103
FGF signaling pathway	0.873839	5.30048	1.30103
Neurotrophic factor-mediated Trk receptor signaling	1.36537	5.20107	1.30103
NCAM signaling for neurite out-growth	0.928454	4.85893	1.30103
Receptor-ligand binding initiates the second proteolytic cleavage of Notch receptor	0.32769	4.31706	1.30103
Notch-mediated HES/HEY network	1.20153	4.25181	1.30103
Notch signaling pathway	1.20153	4.25181	1.30103
NOTCH	0.873839	4.24992	1.30103
p75(NTR)-mediated signaling	1.85691	4.20041	1.30103
G0 and Early G1	0.491535	4.19333	1.30103
Syndecan-2-mediated signaling events	1.03768	4.08309	1.30103
RhoA signaling pathway	2.02075	3.97252	1.30103
Regulation of RAC1 activity	2.02075	3.97252	1.30103
Regulation of RhoA activity	2.02075	3.97252	1.30103
RAC1 signaling pathway	2.02075	3.97252	1.30103
Signaling by EGFR	1.20153	3.96362	1.30103
Transmission across Chemical Synapses	1.36537	3.79977	1.30103
Signaling by FGFR	1.14691	3.71147	1.30103
Netrin-1 signaling	0.709995	3.6975	1.30103
Glutamate Neurotransmitter Release Cycle	0.32769	3.64992	1.30103
GRB2 events in EGFR signaling	0.382305	3.64456	1.30103
FRS2-mediated cascade	0.382305	3.64456	1.30103
Notch receptor binds with a ligand	0.273075	3.46758	1.30103
Downstream signaling of activated FGFR	0.873839	3.43786	1.30103
SHC1 events in EGFR signaling	0.382305	3.43186	1.30103
Botulinum neurotoxicity	0.21846	3.42182	1.30103
Neuronal System	1.80229	3.38363	1.30103
Epithelial-to-mesenchymal transition	1.74768	3.18589	1.30103
TGFBR	1.31076	3.18039	1.30103
SHC-mediated signalling	0.32769	3.15298	1.30103
ATM pathway	2.5669	3.12056	1.30103
Semaphorin interactions	0.819224	3.09339	1.30103
Proteolytic cleavage of SNARE complex proteins	0.163845	3.06452	1.30103
Regulation of nuclear beta catenin signaling and target gene transcription	1.36537	3.04816	1.30103
EPHB forward signaling	0.600765	3.01404	1.30103
L1CAM interactions	0.928454	2.97745	1.30103
Signaling by SCF-KIT	0.819224	2.94618	1.30103
Androgen-mediated signaling	1.31076	2.93065	1.30103
Signal transduction by L1	0.54615	2.92655	1.30103
Wnt signaling network	1.80229	2.90262	1.30103
Frs2-mediated activation	0.382305	2.89913	1.30103
Role of second messengers in netrin-1 signaling	0.273075	2.88534	1.30103
Rap1 signalling	0.273075	2.88534	1.30103
Signalling to ERKs	0.491535	2.84871	1.30103
Apoptotic execution phase	0.65538	2.84011	1.30103
BMP receptor signaling	1.96614	2.83107	1.30103
Canonical Wnt signaling pathway	1.4746	2.82777	1.30103
Netrin mediated repulsion signals	0.32769	2.76071	1.30103
SOS-mediated signalling	0.32769	2.76071	1.30103
Prolonged ERK activation events	0.382305	2.74896	1.30103
Effects of PIP2 hydrolysis	0.382305	2.74896	1.30103
Noncanonical Wnt signaling pathway	1.63845	2.68589	1.30103
Glypican 3 network	1.80229	2.68521	1.30103
RXR and RAR heterodimerization with other nuclear receptor	0.43692	2.66371	1.30103
Neurotransmitter Release Cycle	0.43692	2.66371	1.30103
RAF/MAP kinase cascade	0.273075	2.65745	1.30103
TNF receptor signaling pathway	2.40306	2.61733	1.30103
Signaling by Notch	0.382305	2.60973	1.30103
Signalling to RAS	0.382305	2.60973	1.30103
Signaling by PDGF	0.873839	2.60832	1.30103
NGF signalling via TRKA from the plasma membrane	1.0923	2.60346	1.30103
SHC-related events	0.32769	2.59279	1.30103
Sema4D in semaphorin signaling	0.43692	2.54844	1.30103
Apoptotic cleavage of cellular proteins	0.54615	2.53971	1.30103
Signaling events mediated by Stem cell factor receptor (c-Kit)	0.65538	2.52313	1.30103
Phosphorylation of proteins involved in G1/S transition by active Cyclin E:Cdk2 complexes	0.163845	2.49458	1.30103
Regulation of retinoblastoma protein	0.76461	2.48885	1.30103
Presenilin action in Notch and Wnt signaling	0.600765	2.48347	1.30103
GABA synthesis, release, reuptake and degradation	0.32769	2.43984	1.30103
Thrombin signalling through proteinase activated receptors (PARs)	0.32769	2.43984	1.30103
C-MYC pathway	1.36537	2.43705	1.30103
Trk receptor signaling mediated by the MAPK pathway	0.491535	2.43559	1.30103
Post NMDA receptor activation events	0.491535	2.43559	1.30103
Activation of NMDA receptor upon glutamate binding and postsynaptic events	0.491535	2.43559	1.30103
Retinoic acid receptors-mediated signaling	0.600765	2.40597	1.30103
Interleukin-6 signaling	0.21846	2.37797	1.30103
Downstream signal transduction	0.819224	2.36982	1.30103
Fc-epsilon receptor I signaling in mast cells	0.709995	2.36722	1.30103
NCAM1 interactions	0.382305	2.35931	1.30103
BMAL1:CLOCK/NPAS2 Activates Gene Expression	0.382305	2.35931	1.30103
Reelin signaling pathway	0.43692	2.33664	1.30103
Regulation of Insulin Secretion	0.600765	2.3312	1.30103
Signaling events mediated by HDAC Class I	1.0923	2.32139	1.30103
Syndecan-4-mediated signaling events	1.74768	2.31394	1.30103
LPA receptor mediated events	0.983069	2.22106	1.30103
AndrogenReceptor	0.819224	2.20459	1.30103
Integrins in angiogenesis	0.709995	2.18206	1.30103
Neurofascin interactions	0.21846	2.15654	1.30103
Regulation of KIT signaling	0.21846	2.15654	1.30103
Serotonin Neurotransmitter Release Cycle	0.21846	2.15654	1.30103
Effects of Botulinum toxin	0.21846	2.15654	1.30103
Dopamine Neurotransmitter Release Cycle	0.21846	2.15654	1.30103
chondroitin sulfate biosynthesis	0.32769	2.05189	1.30103
FGFR2c ligand binding and activation	0.10923	2.0428	1.30103
Nongenotropic Androgen signaling	0.382305	2.04041	1.30103
Neurotransmitter Receptor Binding And Downstream Transmission In The Postsynaptic Cell	0.873839	2.02817	1.30103
Opioid Signalling	0.600765	1.99381	1.30103
Sema3A PAK dependent Axon repulsion	0.273075	1.98492	1.30103
PAR4-mediated thrombin signaling events	0.273075	1.98492	1.30103
Signaling by Interleukins	0.873839	1.8932	1.30103
Alpha6Beta4Integrin	0.54615	1.86807	1.30103
ERK activation	0.163845	1.85936	1.30103
Interleukin-2 signaling	0.382305	1.85795	1.30103
IL2 signaling events mediated by STAT5	0.382305	1.85795	1.30103
CREB phosphorylation through the activation of Ras	0.382305	1.85795	1.30103
Signalling to p38 via RIT and RIN	0.273075	1.85703	1.30103
CRMPs in Sema3A signaling	0.273075	1.85703	1.30103
p73 transcription factor network	0.76461	1.83287	1.30103
FoxO family signaling	0.54615	1.80655	1.30103
Caspase-mediated cleavage of cytoskeletal proteins	0.21846	1.80569	1.30103
Norepinephrine Neurotransmitter Release Cycle	0.21846	1.80569	1.30103
Acetylcholine Neurotransmitter Release Cycle	0.21846	1.80569	1.30103
Signalling by NGF	1.20153	1.7833	1.30103
Validated nuclear estrogen receptor alpha network	0.65538	1.78171	1.30103
VEGFR1 specific signals	0.382305	1.77427	1.30103
Sphingolipid metabolism	0.382305	1.77427	1.30103
EGFR interacts with phospholipase C-gamma	0.382305	1.77427	1.30103
Signaling events mediated by PRL	0.32769	1.74326	1.30103
heparan sulfate biosynthesis	0.32769	1.74326	1.30103
Hypoxic and oxygen homeostasis regulation of HIF-1-alpha	0.76461	1.7417	1.30103
Zinc transporters	0.273075	1.7405	1.30103
RNA Polymerase III Transcription Termination	0.273075	1.7405	1.30103
Validated targets of C-MYC transcriptional activation	0.76461	1.69778	1.30103
PLC-gamma1 signalling	0.382305	1.69509	1.30103
HIF-1-alpha transcription factor network	0.65538	1.68208	1.30103
CXCR3-mediated signaling events	0.43692	1.6782	1.30103
p38 MAPK signaling pathway	1.4746	1.66849	1.30103
chondroitin sulfate biosynthesis (late stages)	0.21846	1.66305	1.30103
ATF-2 transcription factor network	0.600765	1.6563	1.30103
FGFR2 ligand binding and activation	0.163845	1.64793	1.30103
FGFR2b ligand binding and activation	0.163845	1.64793	1.30103
Activation of BAD and translocation to mitochondria	0.163845	1.64793	1.30103
inositol pyrophosphates biosynthesis	0.163845	1.64793	1.30103
NrCAM interactions	0.163845	1.64793	1.30103
Zinc efflux and compartmentalization by the SLC30 family	0.163845	1.64793	1.30103
gamma-linolenate biosynthesis II (animals)	0.163845	1.64793	1.30103
MEK activation	0.163845	1.64793	1.30103
RAF phosphorylates MEK	0.163845	1.64793	1.30103
RSK activation	0.163845	1.64793	1.30103
CXCR4-mediated signaling events	1.4746	1.64176	1.30103
ARMS-mediated activation	0.273075	1.63379	1.30103
G alpha (s) signalling events	0.382305	1.62008	1.30103
G1 Phase	0.382305	1.62008	1.30103
Cyclin D associated events in G1	0.382305	1.62008	1.30103
Vpr-mediated nuclear import of PICs	0.382305	1.62008	1.30103
Glucose transport	0.43692	1.61219	1.30103
EphrinB-EPHB pathway	0.600765	1.60607	1.30103
Autointegration results in viral DNA circles	0.10923	1.59413	1.30103
Class IB PI3K non-lipid kinase events	0.10923	1.59413	1.30103
Stimulation of the cell death response by PAK-2p34	0.10923	1.59413	1.30103
Regulation of Androgen receptor activity	0.928454	1.5783	1.30103
Metal ion SLC transporters	0.32769	1.57007	1.30103
Deadenylation-dependent mRNA decay	0.491535	1.56136	1.30103
PLC beta mediated events	0.43692	1.54907	1.30103
GAB1 signalosome	0.382305	1.54893	1.30103
Netrin-mediated signaling events	0.382305	1.54893	1.30103
Circadian Clock	0.382305	1.54893	1.30103
ErbB4 signaling events	0.382305	1.54893	1.30103
Signaling events regulated by Ret tyrosine kinase	0.65538	1.54298	1.30103
mRNA Decay by 5' to 3' Exoribonuclease	0.21846	1.53666	1.30103
Signaling by BMP	0.273075	1.53568	1.30103
KitReceptor	0.54615	1.52962	1.30103
Metabolism of vitamins and cofactors	0.491535	1.50601	1.30103
TCR signaling	0.491535	1.50601	1.30103
Metabolism of water-soluble vitamins and cofactors	0.491535	1.50601	1.30103
G-protein mediated events	0.43692	1.48868	1.30103
Hexose transport	0.43692	1.48868	1.30103
Sema4D mediated inhibition of cell attachment and migration	0.163845	1.47525	1.30103
Role of DCC in regulating apoptosis	0.163845	1.47525	1.30103
Validated targets of C-MYC transcriptional repression	0.600765	1.46443	1.30103
p53 pathway	1.41999	1.44588	1.30103
superpathway of D-myo-inositol (1,4,5)-trisphosphate metabolism	0.273075	1.44515	1.30103
Destabilization of mRNA by Butyrate Response Factor 1 (BRF1)	0.273075	1.44515	1.30103
IL1-mediated signaling events	1.69306	1.42814	1.30103
SEMA3A-Plexin repulsion signaling by inhibiting Integrin adhesion	0.21846	1.42371	1.30103
S1P4 pathway	0.21846	1.42371	1.30103
Platelet activation, signaling and aggregation	1.0923	1.42199	1.30103
Phospholipase C-mediated cascade	0.32769	1.41755	1.30103
Ca-dependent events	0.32769	1.41755	1.30103
PI-3K cascade	0.32769	1.41755	1.30103
DAG and IP3 signaling	0.32769	1.41755	1.30103
EPO signaling pathway	0.382305	1.41716	1.30103
Interactions of Vpr with host cellular proteins	0.382305	1.41716	1.30103
Regulation of p38-alpha and p38-beta	1.25614	1.41688	1.30103
E-cadherin signaling in keratinocytes	0.273075	1.36134	1.30103
p38 signaling mediated by MAPKAP kinases	0.273075	1.36134	1.30103
Signaling mediated by p38-alpha and p38-beta	0.491535	1.35203	1.30103
Transport to the Golgi and subsequent modification	0.32769	1.34796	1.30103
Wnt	0.709995	1.34013	1.30103
Regulation of pyruvate dehydrogenase (PDH) complex	0.163845	1.33041	1.30103
Bicarbonate transporters	0.163845	1.33041	1.30103
EphrinA-EPHA pathway	0.43692	1.32236	1.30103
D-myo-inositol (1,3,4)-trisphosphate biosynthesis	0.21846	1.32204	1.30103
Vitamin B1 (thiamin) metabolism	0.10923	1.3213	1.30103
Mature Notch receptor traffics to plasma membrane	0.10923	1.3213	1.30103
Assembly of the RAD50-MRE11-NBS1 complex at DNA double-strand breaks	0.10923	1.3213	1.30103
Transport of Notch receptor precursor to golgi	0.10923	1.3213	1.30103
MRN complex relocalizes to nuclear foci	0.10923	1.3213	1.30103
Integration of energy metabolism	0.709995	1.30403	1.30103
ATR signaling pathway	1.74768	1.28432	1.30103
Regulatory RNA pathways	0.273075	1.28354	1.30103
Sema4D induced cell migration and growth-cone collapse	0.273075	1.28354	1.30103
G alpha (z) signalling events	0.273075	1.28354	1.30103
MicroRNA (miRNA) Biogenesis	0.273075	1.28354	1.30103
Deadenylation of mRNA	0.273075	1.28354	1.30103
S1P3 pathway	0.32769	1.28233	1.30103
Interleukin-3, 5 and GM-CSF signaling	0.32769	1.28233	1.30103
Insulin-mediated glucose transport	0.32769	1.28233	1.30103
C-MYB transcription factor network	0.709995	1.26885	1.30103
Caspase cascade in apoptosis	0.491535	1.25853	1.30103
Regulation of Telomerase	0.600765	1.25542	1.30103
Glucocorticoid receptor signaling	0.709995	1.23456	1.30103
Regulation of Insulin Secretion by Glucagon-like Peptide-1	0.21846	1.22999	1.30103
heparan sulfate biosynthesis (late stages)	0.21846	1.22999	1.30103
Signaling by NODAL	0.21846	1.22999	1.30103
MAP kinase activation in TLR cascade	0.32769	1.22037	1.30103
Transcriptional Regulation of White Adipocyte Differentiation	0.600765	1.21726	1.30103
Signaling by Robo receptor	0.273075	1.21115	1.30103
Pyruvate metabolism	0.163845	1.20658	1.30103
Dissolution of Fibrin Clot	0.163845	1.20658	1.30103
GRB2:SOS provides linkage to MAPK signaling for Intergrins	0.163845	1.20658	1.30103
Direct p53 effectors	1.03768	1.18842	1.30103
Role of Calcineurin-dependent NFAT signaling in lymphocytes	0.76461	1.18296	1.30103
EPHA forward signaling	0.32769	1.1618	1.30103
Export of Viral Ribonucleoproteins from Nucleus	0.32769	1.1618	1.30103
Intrinsic Pathway for Apoptosis	0.32769	1.1618	1.30103
dermatan sulfate biosynthesis	0.21846	1.14623	1.30103
Destabilization of mRNA by Tristetraprolin (TTP)	0.21846	1.14623	1.30103
Negative regulation of FGFR signaling	0.21846	1.14623	1.30103
Purine metabolism	0.273075	1.14363	1.30103
Voltage gated Potassium channels	0.382305	1.13918	1.30103
Mitotic G1-G1/S phases	1.03768	1.13859	1.30103
Activation of CaMK IV	0.10923	1.12741	1.30103
folate polyglutamylation	0.10923	1.12741	1.30103
APOBEC3G mediated resistance to HIV-1 infection	0.10923	1.12741	1.30103
CaMK IV-mediated phosphorylation of CREB	0.10923	1.12741	1.30103
NGF-independant TRKA activation	0.10923	1.12741	1.30103
SMAC binds to IAPs	0.10923	1.12741	1.30103
SMAC-mediated dissociation of IAP:caspase complexes	0.10923	1.12741	1.30103
CREB phosphorylation through the activation of Adenylate Cyclase	0.10923	1.12741	1.30103
RAF activation	0.10923	1.12741	1.30103
Maturation of Notch precursor via proteolytic cleavage	0.10923	1.12741	1.30103
SMAC-mediated apoptotic response	0.10923	1.12741	1.30103
Glucocorticoid receptor regulatory network	0.65538	1.1223	1.30103
Recycling pathway of L1	0.32769	1.10637	1.30103
Notch-HLH transcription pathway	0.163845	1.09916	1.30103
CDC6 association with the ORC:origin complex	0.163845	1.09916	1.30103
NICD traffics to nucleus	0.163845	1.09916	1.30103
TCR signaling in na&#xef;ve CD4+ T cells	0.983069	1.09338	1.30103
Hedgehog signaling events mediated by Gli proteins	0.43692	1.0874	1.30103
VEGFR3 signaling in lymphatic endothelium	0.273075	1.08054	1.30103
CaM pathway	0.273075	1.08054	1.30103
Calmodulin induced events	0.273075	1.08054	1.30103
DARPP-32 events	0.21846	1.06969	1.30103
Signaling events mediated by the Hedgehog family	0.54615	1.06269	1.30103
Toll Like Receptor 9 (TLR9) Cascade	0.54615	1.06269	1.30103
L-cysteine degradation II	0.054615	1.02129	1.30103
adenine and adenosine salvage VI	0.054615	1.02129	1.30103
BoNT Light Chain Types A, C1, E cleave SNAP-25	0.054615	1.02129	1.30103
BoNT Light Chain Types B, D, and F cleave VAMP/Synaptobrevin	0.054615	1.02129	1.30103
Nuclear Receptor transcription pathway	0.054615	1.02129	1.30103
SLC-mediated transmembrane transport	1.63845	1.00523	1.30103
Apoptotic cleavage of cell adhesion proteins	0.163845	1.00492	1.30103
N-glycan antennae elongation in the medial/trans-Golgi	0.163845	1.00492	1.30103
stearate biosynthesis I (animals)	0.163845	1.00492	1.30103
Interaction between L1 and Ankyrins	0.163845	1.00492	1.30103
RNA Polymerase III Transcription	0.32769	1.00408	1.30103
RNA Polymerase III Abortive And Retractive Initiation	0.32769	1.00408	1.30103
IL8- and CXCR2-mediated signaling events	0.32769	1.00408	1.30103
Ras signaling in the CD4+ TCR pathway	0.382305	1.00106	1.30103
3-phosphoinositide degradation	0.21846	0.999475	1.30103
Generation of second messenger molecules	0.21846	0.999475	1.30103
TRAF6 mediated induction of NFkB and MAP kinases upon TLR7/8 or 9 activation	0.491535	0.979685	1.30103
MyD88 cascade initiated on plasma membrane	0.491535	0.979685	1.30103
CREB phosphorylation through the activation of CaMKK	0.10923	0.979018	1.30103
FGFR1b ligand binding and activation	0.10923	0.979018	1.30103
Elevation of cytosolic Ca2+ levels	0.10923	0.979018	1.30103
chondroitin and dermatan biosynthesis	0.10923	0.979018	1.30103
Activation of TRKA receptors	0.10923	0.979018	1.30103
SHC-mediated cascade	0.10923	0.979018	1.30103
acetyl-CoA biosynthesis (from pyruvate)	0.10923	0.979018	1.30103
ADP signalling through P2Y purinoceptor 12	0.10923	0.979018	1.30103
fatty acid activation	0.10923	0.979018	1.30103
Molybdenum cofactor biosynthesis	0.10923	0.979018	1.30103
EGFR1	0.983069	0.976838	1.30103
IRS-mediated signalling	0.43692	0.967458	1.30103
Adherens junctions interactions	0.273075	0.966115	1.30103
HIV Life Cycle	0.76461	0.957617	1.30103
Generic Transcription Pathway	0.32769	0.956842	1.30103
a6b1 and a6b4 Integrin signaling	0.32769	0.956842	1.30103
Asparagine N-linked glycosylation	0.600765	0.949412	1.30103
MyD88 dependent cascade initiated on endosome	0.491535	0.945191	1.30103
Toll Like Receptor 10 (TLR10) Cascade	0.491535	0.945191	1.30103
Toll Like Receptor 5 (TLR5) Cascade	0.491535	0.945191	1.30103
PKA-mediated phosphorylation of CREB	0.21846	0.934864	1.30103
D-myo-inositol (1,4,5)-trisphosphate degradation	0.163845	0.921479	1.30103
G-protein activation	0.163845	0.921479	1.30103
E2F mediated regulation of DNA replication	0.273075	0.914132	1.30103
Transmembrane transport of small molecules	2.34844	0.899846	1.30103
IRS-related events	0.43692	0.894965	1.30103
Toll Like Receptor 7/8 (TLR7/8) Cascade	0.491535	0.879698	1.30103
MyD88:Mal cascade initiated on plasma membrane	0.491535	0.879698	1.30103
G alpha (12/13) signalling events	0.21846	0.87524	1.30103
Regulation of Glucokinase by Glucokinase Regulatory Protein	0.273075	0.865266	1.30103
Transport of Ribonucleoproteins into the Host Nucleus	0.273075	0.865266	1.30103
Ion transport by P-type ATPases	0.273075	0.865266	1.30103
NEP/NS2 Interacts with the Cellular Export Machinery	0.273075	0.865266	1.30103
PECAM1 interactions	0.10923	0.860334	1.30103
Nectin/Necl trans heterodimerization	0.10923	0.860334	1.30103
2-LTR circle formation	0.10923	0.860334	1.30103
Pyrimidine salvage reactions	0.10923	0.860334	1.30103
glycoaminoglycan-protein linkage region biosynthesis	0.10923	0.860334	1.30103
Purine salvage	0.10923	0.860334	1.30103
FGFR1 ligand binding and activation	0.10923	0.860334	1.30103
Apoptotic factor-mediated response	0.10923	0.860334	1.30103
Interleukin receptor SHC signaling	0.10923	0.860334	1.30103
CREB phosphorylation	0.10923	0.860334	1.30103
pyrimidine deoxyribonucleotides de novo biosynthesis	0.163845	0.847056	1.30103
ID	0.163845	0.847056	1.30103
Synthesis of very long-chain fatty acyl-CoAs	0.163845	0.847056	1.30103
guanosine nucleotides de novo biosynthesis	0.163845	0.847056	1.30103
FGFR ligand binding and activation	0.163845	0.847056	1.30103
Ion channel transport	0.382305	0.843431	1.30103
IL8-mediated signaling events	0.32769	0.828837	1.30103
Signaling events mediated by HDAC Class II	0.32769	0.828837	1.30103
ErbB2/ErbB3 signaling events	0.32769	0.828837	1.30103
Nuclear import of Rev protein	0.273075	0.819275	1.30103
Toll Like Receptor TLR6:TLR2 Cascade	0.491535	0.818578	1.30103
Validated transcriptional targets of deltaNp63 isoforms	0.491535	0.818578	1.30103
Toll Like Receptor TLR1:TLR2 Cascade	0.491535	0.818578	1.30103
Class B/2 (Secretin family receptors)	0.382305	0.808132	1.30103
Insulin receptor signalling cascade	0.43692	0.796163	1.30103
Toll Like Receptor 2 (TLR2) Cascade	0.491535	0.789558	1.30103
Signaling events mediated by TCPTP	0.65538	0.786943	1.30103
Late Phase of HIV Life Cycle	0.65538	0.786943	1.30103
CREB phosphorylation through the activation of CaMKII	0.163845	0.780262	1.30103
Lysosome Vesicle Biogenesis	0.163845	0.780262	1.30103
Nuclear Events (kinase and transcription factor activation)	0.163845	0.780262	1.30103
Association of licensing factors with the pre-replicative complex	0.163845	0.780262	1.30103
G1/S-Specific Transcription	0.163845	0.780262	1.30103
1D-myo-inositol hexakisphosphate biosynthesis II (mammalian)	0.163845	0.780262	1.30103
Sumoylation by RanBP2 regulates transcriptional repression	0.163845	0.780262	1.30103
Lissencephaly gene (LIS1) in neuronal migration and development	0.273075	0.775947	1.30103
Pyruvate metabolism and Citric Acid (TCA) cycle	0.273075	0.775947	1.30103
Apoptosis	1.03768	0.764415	1.30103
Activation of Kainate Receptors upon glutamate binding	0.10923	0.76258	1.30103
TRAF6 mediated IRF7 activation in TLR7/8 or 9 signaling	0.10923	0.76258	1.30103
Activation of Rac	0.10923	0.76258	1.30103
Metabolism of folate and pterines	0.10923	0.76258	1.30103
Lysosphingolipid and LPA receptors	0.10923	0.76258	1.30103
Thromboxane signalling through TP receptor	0.10923	0.76258	1.30103
Signaling by Rho GTPases	0.10923	0.76258	1.30103
Integration of provirus	0.10923	0.76258	1.30103
cysteine biosynthesis III (mammalia)	0.10923	0.76258	1.30103
Recruitment of repair and signaling proteins to double-strand breaks	0.10923	0.76258	1.30103
Inactivation of Cdc42 and Rac	0.10923	0.76258	1.30103
S1P5 pathway	0.10923	0.76258	1.30103
Rho GTPase cycle	0.10923	0.76258	1.30103
Activation of DNA fragmentation factor	0.10923	0.76258	1.30103
A third proteolytic cleavage releases NICD	0.10923	0.76258	1.30103
Apoptosis induced DNA fragmentation	0.10923	0.76258	1.30103
FAS (CD95) signaling pathway	0.873839	0.76218	1.30103
D-myo-inositol (3,4,5,6)-tetrakisphosphate biosynthesis	0.054615	0.741434	1.30103
Neurotransmitter uptake and Metabolism In Glial Cells	0.054615	0.741434	1.30103
Translocation of BoNT Light chain	0.054615	0.741434	1.30103
Reactions specific to the complex N-glycan synthesis pathway	0.054615	0.741434	1.30103
Astrocytic Glutamate-Glutamine Uptake And Metabolism	0.054615	0.741434	1.30103
DNA Damage Recognition in GG-NER	0.054615	0.741434	1.30103
FGFR3b ligand binding and activation	0.054615	0.741434	1.30103
Viral RNP Complexes in the Host Cell Nucleus	0.054615	0.741434	1.30103
Polyamines are oxidized to amines, aldehydes and H2O2 by PAOs	0.054615	0.741434	1.30103
Vitamins B6 activation to pyridoxal phosphate	0.054615	0.741434	1.30103
FGFR1c ligand binding and activation	0.054615	0.741434	1.30103
Inhibition of Insulin Secretion by Adrenaline/Noradrenaline	0.054615	0.741434	1.30103
Ionotropic activity of Kainate Receptors	0.054615	0.741434	1.30103
FGFR4 ligand binding and activation	0.054615	0.741434	1.30103
FGFR3c ligand binding and activation	0.054615	0.741434	1.30103
pyridoxal 5'-phosphate salvage pathway	0.054615	0.741434	1.30103
spermine biosynthesis	0.054615	0.741434	1.30103
spermidine biosynthesis	0.054615	0.741434	1.30103
dolichol and dolichyl phosphate biosynthesis	0.054615	0.741434	1.30103
Activation of Na-permeable Kainate Receptors	0.054615	0.741434	1.30103
ERK2 activation	0.054615	0.741434	1.30103
cysteine biosynthesis/homocysteine degradation	0.054615	0.741434	1.30103
Regulation of PAK-2p34 activity by PS-GAP/RHG10	0.054615	0.741434	1.30103
glycine biosynthesis I	0.054615	0.741434	1.30103
phospho-PLA2 pathway	0.054615	0.741434	1.30103
FGFR3 ligand binding and activation	0.054615	0.741434	1.30103
Transport of inorganic cations/anions and amino acids/oligopeptides	0.65538	0.740882	1.30103
Metabolism of nucleotides	0.43692	0.736286	1.30103
Transport of the SLBP independent Mature mRNA	0.273075	0.735087	1.30103
Rev-mediated nuclear export of HIV-1 RNA	0.273075	0.735087	1.30103
Potassium Channels	0.54615	0.735019	1.30103
Circadian rhythm pathway	0.163845	0.720003	1.30103
Glucagon-type ligand receptors	0.163845	0.720003	1.30103
Spry regulation of FGF signaling	0.163845	0.720003	1.30103
Platelet calcium homeostasis	0.163845	0.720003	1.30103
Hedgehog	0.163845	0.720003	1.30103
Signal amplification	0.163845	0.720003	1.30103
LPA4-mediated signaling events	0.163845	0.720003	1.30103
Other semaphorin interactions	0.163845	0.720003	1.30103
TRAF6 Mediated Induction of proinflammatory cytokines	0.382305	0.710845	1.30103
Angiopoietin receptor Tie2-mediated signaling	0.382305	0.710845	1.30103
Hemostasis	2.23921	0.709263	1.30103
p63 transcription factor network	0.709995	0.703498	1.30103
Transport of the SLBP Dependant Mature mRNA	0.273075	0.696522	1.30103
Alpha4 beta1 integrin signaling events	0.273075	0.696522	1.30103
Interactions of Rev with host cellular proteins	0.273075	0.696522	1.30103
IL2-mediated signaling events	0.76461	0.690749	1.30103
JNK signaling in the CD4+ TCR pathway	0.32769	0.685334	1.30103
FOXM1 transcription factor network	0.32769	0.685334	1.30103
Nef mediated downregulation of MHC class I complex cell surface expression	0.10923	0.68036	1.30103
N-Glycan antennae elongation	0.10923	0.68036	1.30103
p38MAPK events	0.10923	0.68036	1.30103
Sodium/Calcium exchangers	0.10923	0.68036	1.30103
Regulated proteolysis of p75NTR	0.10923	0.68036	1.30103
Role of Abl in Robo-Slit signaling	0.10923	0.68036	1.30103
Nephrin/Neph1 signaling in the kidney podocyte	0.21846	0.677219	1.30103
PKA activation in glucagon signalling	0.163845	0.665399	1.30103
Activation of BH3-only proteins	0.163845	0.665399	1.30103
Syndecan-3-mediated signaling events	0.163845	0.665399	1.30103
Beta5 beta6 beta7 and beta8 integrin cell surface interactions	0.163845	0.665399	1.30103
Signaling by Insulin receptor	0.54615	0.663619	1.30103
HIF-2-alpha transcription factor network	0.273075	0.660096	1.30103
Coregulation of Androgen receptor activity	0.43692	0.654511	1.30103
Cell-Cell communication	0.76461	0.653273	1.30103
S1P2 pathway	0.21846	0.636014	1.30103
Transport of Mature mRNA Derived from an Intronless Transcript	0.273075	0.625665	1.30103
HIV-1 Nef: Negative effector of Fas and TNF-alpha	0.273075	0.625665	1.30103
FOXA transcription factor networks	0.54615	0.619604	1.30103
Tie2 Signaling	0.163845	0.615731	1.30103
CD28 dependent Vav1 pathway	0.163845	0.615731	1.30103
Fatty Acyl-CoA Biosynthesis	0.163845	0.615731	1.30103
Activated TLR4 signalling	0.491535	0.61192	1.30103
IRAK1 recruits IKK complex upon TLR7/8 or 9 stimulation	0.10923	0.61011	1.30103
p130Cas linkage to MAPK signaling for integrins	0.10923	0.61011	1.30103
DCC mediated attractive signaling	0.10923	0.61011	1.30103
ADP signalling through P2Y purinoceptor 1	0.10923	0.61011	1.30103
IRAK1 recruits IKK complex	0.10923	0.61011	1.30103
Zinc influx into cells by the SLC39 gene family	0.10923	0.61011	1.30103
G alpha (q) signalling events	0.76461	0.600357	1.30103
NFkB and MAP kinases activation mediated by TLR4 signaling repertoire	0.382305	0.598839	1.30103
Thromboxane A2 receptor signaling	0.382305	0.598839	1.30103

## Sheet: Biological pathway
Dataset: New Set
Enrichment analysis: Biological pathway
Number of genes in the dataset: 1831
Number of genes in the dataset (which are available in Biological pathway database) :668
Number of genes in background: 19230
						Corrected p-values
Biological pathway	No. of genes in the dataset	No.of genes in the background dataset	Percentage of genes	Fold enrichment	P-value (Hypergeometric test)	Bonferroni method	BH method	Q-value (Storey-Tibshirani method)	Mapped gene names
ErbB receptor signaling network	215	1308	11.7422	1.72638	2.46912e-16	4.11849e-13	3.20007e-13	1.07712e-12	ADAM17; CCND2; DNMT3A; HGF; KPNA2; MTDH; PAK2; PTEN; TBC1D4; ULK1; ULK2; ABCC1; AKT3; ASAP2; CDH1; CDK5R1; CHN2; CHRDL1; CLU; DKK1; DOCK4; E2F3; EGR1; ENAH; FBXO11; FGFR2; FN1; FOXG1; FOXO3; FOXO4; G6PC; GAB1; HIF1A; HNRNPA1; KRAS; MAF; MAPK1; MED1; NCAM1; NF1; PPARGC1A; PPM1D; RAB4A; RAP1B; RCAN1; ROBO1; ROCK1; RUNX1; RUNX2; SDC2; SETD8; SHMT1; SIRT1; SOS1; SUPT3H; SUV420H1; TCF7L2; TGFBR2; TNIK…
Plasma membrane estrogen receptor signaling	212	1298	11.5784	1.71541	8.30953e-16	1.38603e-12	3.20007e-13	1.07712e-12	CCND2; DNMT3A; HGF; KPNA2; MTDH; PAK2; PTEN; TBC1D4; ULK1; ULK2; ABCC1; AKT3; ASAP2; CDH1; CDK5R1; CHN2; CHRDL1; CLU; DKK1; DOCK4; E2F3; EGR1; ENAH; FBXO11; FGFR2; FN1; FOXG1; FOXO3; FOXO4; G6PC; GAB1; HIF1A; HNRNPA1; KRAS; MAF; MAPK1; MED1; NCAM1; NF1; PPARGC1A; PPM1D; RAB4A; RAP1B; RCAN1; ROBO1; ROCK1; RUNX1; RUNX2; SDC2; SETD8; SHMT1; SIRT1; SOS1; STRN; SUPT3H; SUV420H1; TCF7L2; TGFBR2; TNIK; …
Nectin adhesion pathway	210	1292	11.4691	1.70712	1.95881e-15	3.2673e-12	3.20007e-13	1.07712e-12	CCND2; DNMT3A; HGF; KPNA2; MTDH; PAK2; PTEN; TBC1D4; ULK1; ULK2; ABCC1; AKT3; ASAP2; CDH1; CDK5R1; CHN2; CHRDL1; CLU; DKK1; DOCK4; E2F3; EGR1; ENAH; FBXO11; FGFR2; FN1; FOXG1; FOXO3; FOXO4; G6PC; GAB1; HIF1A; HNRNPA1; KRAS; MAF; MAPK1; MED1; NCAM1; NF1; PPARGC1A; PPM1D; RAB4A; RAP1B; RCAN1; ROBO1; ROCK1; RUNX1; RUNX2; SDC2; SETD8; SHMT1; SIRT1; SOS1; SUPT3H; SUV420H1; TCF7L2; TGFBR2; TNIK; USP7; …
IGF1 pathway	209	1288	11.4145	1.70426	2.76003e-15	4.60373e-12	3.20007e-13	1.07712e-12	CCND2; DNMT3A; HGF; KPNA2; MTDH; PAK2; PTEN; TBC1D4; ULK1; ULK2; ABCC1; AKT3; ASAP2; CDH1; CDK5R1; CHN2; CHRDL1; CLU; DKK1; DOCK4; E2F3; EGR1; ENAH; FBXO11; FGFR2; FN1; FOXG1; FOXO3; FOXO4; G6PC; GAB1; HIF1A; HNRNPA1; KRAS; MAF; MAPK1; MED1; NCAM1; NF1; PPARGC1A; PPM1D; RAB4A; RAP1B; RCAN1; ROBO1; ROCK1; RUNX1; RUNX2; SDC2; SETD8; SHMT1; SIRT1; SOS1; SUPT3H; SUV420H1; TCF7L2; TGFBR2; TNIK; USP7; …
LKB1 signaling events	211	1305	11.5238	1.69816	2.9382e-15	4.90092e-12	3.20007e-13	1.07712e-12	CCND2; DNMT3A; HGF; KPNA2; MTDH; PAK2; PTEN; TBC1D4; ULK1; ULK2; ABCC1; AKT3; ASAP2; CDH1; CDK5R1; CHN2; CHRDL1; CLU; DKK1; DOCK4; E2F3; EGR1; ENAH; FBXO11; FGFR2; FN1; FOXG1; FOXO3; FOXO4; G6PC; GAB1; HIF1A; HNRNPA1; KRAS; MAF; MAPK1; MED1; NCAM1; NF1; PPARGC1A; PPM1D; RAB4A; RAP1B; RCAN1; ROBO1; ROCK1; RUNX1; RUNX2; SDC2; SETD8; SHMT1; SIK2; SIRT1; SOS1; SUPT3H; SUV420H1; TCF7L2; TGFBR2; TNIK; …
Signaling events mediated by Hepatocyte Growth Factor Receptor (c-Met)	209	1290	11.4145	1.70162	3.25895e-15	5.43593e-12	3.20007e-13	1.07712e-12	CCND2; DNMT3A; HGF; KPNA2; MTDH; PAK2; PTEN; TBC1D4; ULK1; ULK2; ABCC1; AKT3; ASAP2; CDH1; CDK5R1; CHN2; CHRDL1; CLU; DKK1; DOCK4; E2F3; EGR1; ENAH; FBXO11; FGFR2; FN1; FOXG1; FOXO3; FOXO4; G6PC; GAB1; HIF1A; HNRNPA1; KRAS; MAF; MAPK1; MED1; NCAM1; NF1; PPARGC1A; PPM1D; RAB4A; RAP1B; RCAN1; ROBO1; ROCK1; RUNX1; RUNX2; SDC2; SETD8; SHMT1; SIRT1; SOS1; SUPT3H; SUV420H1; TCF7L2; TGFBR2; TNIK; USP7; …
TRAIL signaling pathway	213	1325	11.633	1.68838	3.98327e-15	6.64409e-12	3.20007e-13	1.07712e-12	CCND2; DNMT3A; HGF; KPNA2; MTDH; PAK2; PTEN; TBC1D4; ULK1; ULK2; ABCC1; AKT3; ASAP2; CDH1; CDK5R1; CHN2; CHRDL1; CLU; DKK1; DOCK4; E2F3; EGR1; ENAH; FBXO11; FGFR2; FN1; FOXG1; FOXO3; FOXO4; G6PC; GAB1; HIF1A; HNRNPA1; KRAS; MAF; MAPK1; MED1; NCAM1; NF1; PPARGC1A; PPM1D; RAB4A; RAP1B; RCAN1; ROBO1; ROCK1; RUNX1; RUNX2; SATB1; SDC2; SETD8; SHMT1; SIRT1; SOS1; SUPT3H; SUV420H1; TCF7L2; TGFBR2; TNIK;…
IFN-gamma pathway	209	1293	11.4145	1.69767	4.17659e-15	6.96655e-12	3.20007e-13	1.07712e-12	CCND2; DNMT3A; HGF; KPNA2; MTDH; PAK2; PTEN; TBC1D4; ULK1; ULK2; ABCC1; AKT3; ASAP2; CDH1; CDK5R1; CHN2; CHRDL1; CLU; DKK1; DOCK4; E2F3; EGR1; ENAH; FBXO11; FGFR2; FN1; FOXG1; FOXO3; FOXO4; G6PC; GAB1; HIF1A; HNRNPA1; KRAS; MAF; MAPK1; MED1; NCAM1; NF1; PPARGC1A; PPM1D; RAB4A; RAP1B; RCAN1; ROBO1; ROCK1; RUNX1; RUNX2; SDC2; SETD8; SHMT1; SIRT1; SOS1; SUPT3H; SUV420H1; TCF7L2; TGFBR2; TNIK; USP7; …
Insulin Pathway	208	1285	11.3599	1.70007	4.22071e-15	7.04014e-12	3.20007e-13	1.07712e-12	CCND2; DNMT3A; HGF; KPNA2; MTDH; PAK2; PTEN; TBC1D4; ULK1; ULK2; ABCC1; AKT3; ASAP2; CDH1; CDK5R1; CHN2; CHRDL1; CLU; DKK1; DOCK4; E2F3; EGR1; ENAH; FBXO11; FGFR2; FN1; FOXG1; FOXO3; FOXO4; G6PC; GAB1; HIF1A; HNRNPA1; KRAS; MAF; MAPK1; MED1; NCAM1; NF1; PPARGC1A; PPM1D; RAB4A; RAP1B; RCAN1; ROBO1; ROCK1; RUNX1; RUNX2; SDC2; SETD8; SHMT1; SIRT1; SOS1; SUPT3H; SUV420H1; TCF7L2; TGFBR2; TNIK; USP7; …
Signaling events mediated by focal adhesion kinase	208	1285	11.3599	1.70007	4.22071e-15	7.04014e-12	3.20007e-13	1.07712e-12	CCND2; DNMT3A; HGF; KPNA2; MTDH; PAK2; PTEN; TBC1D4; ULK1; ULK2; ABCC1; AKT3; ASAP2; CDH1; CDK5R1; CHN2; CHRDL1; CLU; DKK1; DOCK4; E2F3; EGR1; ENAH; FBXO11; FGFR2; FN1; FOXG1; FOXO3; FOXO4; G6PC; GAB1; HIF1A; HNRNPA1; KRAS; MAF; MAPK1; MED1; NCAM1; NF1; PPARGC1A; PPM1D; RAB4A; RAP1B; RCAN1; ROBO1; ROCK1; RUNX1; RUNX2; SDC2; SETD8; SHMT1; SIRT1; SOS1; SUPT3H; SUV420H1; TCF7L2; TGFBR2; TNIK; USP7; …
mTOR signaling pathway	208	1285	11.3599	1.70007	4.22071e-15	7.04014e-12	3.20007e-13	1.07712e-12	CCND2; DNMT3A; HGF; KPNA2; MTDH; PAK2; PTEN; TBC1D4; ULK1; ULK2; ABCC1; AKT3; ASAP2; CDH1; CDK5R1; CHN2; CHRDL1; CLU; DKK1; DOCK4; E2F3; EGR1; ENAH; FBXO11; FGFR2; FN1; FOXG1; FOXO3; FOXO4; G6PC; GAB1; HIF1A; HNRNPA1; KRAS; MAF; MAPK1; MED1; NCAM1; NF1; PPARGC1A; PPM1D; RAB4A; RAP1B; RCAN1; ROBO1; ROCK1; RUNX1; RUNX2; SDC2; SETD8; SHMT1; SIRT1; SOS1; SUPT3H; SUV420H1; TCF7L2; TGFBR2; TNIK; USP7; …
Arf6 downstream pathway	208	1285	11.3599	1.70007	4.22071e-15	7.04014e-12	3.20007e-13	1.07712e-12	CCND2; DNMT3A; HGF; KPNA2; MTDH; PAK2; PTEN; TBC1D4; ULK1; ULK2; ABCC1; AKT3; ASAP2; CDH1; CDK5R1; CHN2; CHRDL1; CLU; DKK1; DOCK4; E2F3; EGR1; ENAH; FBXO11; FGFR2; FN1; FOXG1; FOXO3; FOXO4; G6PC; GAB1; HIF1A; HNRNPA1; KRAS; MAF; MAPK1; MED1; NCAM1; NF1; PPARGC1A; PPM1D; RAB4A; RAP1B; RCAN1; ROBO1; ROCK1; RUNX1; RUNX2; SDC2; SETD8; SHMT1; SIRT1; SOS1; SUPT3H; SUV420H1; TCF7L2; TGFBR2; TNIK; USP7; …
Class I PI3K signaling events mediated by Akt	208	1285	11.3599	1.70007	4.22071e-15	7.04014e-12	3.20007e-13	1.07712e-12	CCND2; DNMT3A; HGF; KPNA2; MTDH; PAK2; PTEN; TBC1D4; ULK1; ULK2; ABCC1; AKT3; ASAP2; CDH1; CDK5R1; CHN2; CHRDL1; CLU; DKK1; DOCK4; E2F3; EGR1; ENAH; FBXO11; FGFR2; FN1; FOXG1; FOXO3; FOXO4; G6PC; GAB1; HIF1A; HNRNPA1; KRAS; MAF; MAPK1; MED1; NCAM1; NF1; PPARGC1A; PPM1D; RAB4A; RAP1B; RCAN1; ROBO1; ROCK1; RUNX1; RUNX2; SDC2; SETD8; SHMT1; SIRT1; SOS1; SUPT3H; SUV420H1; TCF7L2; TGFBR2; TNIK; USP7; …
Internalization of ErbB1	208	1285	11.3599	1.70007	4.22071e-15	7.04014e-12	3.20007e-13	1.07712e-12	CCND2; DNMT3A; HGF; KPNA2; MTDH; PAK2; PTEN; TBC1D4; ULK1; ULK2; ABCC1; AKT3; ASAP2; CDH1; CDK5R1; CHN2; CHRDL1; CLU; DKK1; DOCK4; E2F3; EGR1; ENAH; FBXO11; FGFR2; FN1; FOXG1; FOXO3; FOXO4; G6PC; GAB1; HIF1A; HNRNPA1; KRAS; MAF; MAPK1; MED1; NCAM1; NF1; PPARGC1A; PPM1D; RAB4A; RAP1B; RCAN1; ROBO1; ROCK1; RUNX1; RUNX2; SDC2; SETD8; SHMT1; SIRT1; SOS1; SUPT3H; SUV420H1; TCF7L2; TGFBR2; TNIK; USP7; …
Arf6 signaling events	208	1285	11.3599	1.70007	4.22071e-15	7.04014e-12	3.20007e-13	1.07712e-12	CCND2; DNMT3A; HGF; KPNA2; MTDH; PAK2; PTEN; TBC1D4; ULK1; ULK2; ABCC1; AKT3; ASAP2; CDH1; CDK5R1; CHN2; CHRDL1; CLU; DKK1; DOCK4; E2F3; EGR1; ENAH; FBXO11; FGFR2; FN1; FOXG1; FOXO3; FOXO4; G6PC; GAB1; HIF1A; HNRNPA1; KRAS; MAF; MAPK1; MED1; NCAM1; NF1; PPARGC1A; PPM1D; RAB4A; RAP1B; RCAN1; ROBO1; ROCK1; RUNX1; RUNX2; SDC2; SETD8; SHMT1; SIRT1; SOS1; SUPT3H; SUV420H1; TCF7L2; TGFBR2; TNIK; USP7; …
ErbB1 downstream signaling	208	1285	11.3599	1.70007	4.22071e-15	7.04014e-12	3.20007e-13	1.07712e-12	CCND2; DNMT3A; HGF; KPNA2; MTDH; PAK2; PTEN; TBC1D4; ULK1; ULK2; ABCC1; AKT3; ASAP2; CDH1; CDK5R1; CHN2; CHRDL1; CLU; DKK1; DOCK4; E2F3; EGR1; ENAH; FBXO11; FGFR2; FN1; FOXG1; FOXO3; FOXO4; G6PC; GAB1; HIF1A; HNRNPA1; KRAS; MAF; MAPK1; MED1; NCAM1; NF1; PPARGC1A; PPM1D; RAB4A; RAP1B; RCAN1; ROBO1; ROCK1; RUNX1; RUNX2; SDC2; SETD8; SHMT1; SIRT1; SOS1; SUPT3H; SUV420H1; TCF7L2; TGFBR2; TNIK; USP7; …
Class I PI3K signaling events	208	1285	11.3599	1.70007	4.22071e-15	7.04014e-12	3.20007e-13	1.07712e-12	CCND2; DNMT3A; HGF; KPNA2; MTDH; PAK2; PTEN; TBC1D4; ULK1; ULK2; ABCC1; AKT3; ASAP2; CDH1; CDK5R1; CHN2; CHRDL1; CLU; DKK1; DOCK4; E2F3; EGR1; ENAH; FBXO11; FGFR2; FN1; FOXG1; FOXO3; FOXO4; G6PC; GAB1; HIF1A; HNRNPA1; KRAS; MAF; MAPK1; MED1; NCAM1; NF1; PPARGC1A; PPM1D; RAB4A; RAP1B; RCAN1; ROBO1; ROCK1; RUNX1; RUNX2; SDC2; SETD8; SHMT1; SIRT1; SOS1; SUPT3H; SUV420H1; TCF7L2; TGFBR2; TNIK; USP7; …
PDGFR-beta signaling pathway	208	1285	11.3599	1.70007	4.22071e-15	7.04014e-12	3.20007e-13	1.07712e-12	CCND2; DNMT3A; HGF; KPNA2; MTDH; PAK2; PTEN; TBC1D4; ULK1; ULK2; ABCC1; AKT3; ASAP2; CDH1; CDK5R1; CHN2; CHRDL1; CLU; DKK1; DOCK4; E2F3; EGR1; ENAH; FBXO11; FGFR2; FN1; FOXG1; FOXO3; FOXO4; G6PC; GAB1; HIF1A; HNRNPA1; KRAS; MAF; MAPK1; MED1; NCAM1; NF1; PPARGC1A; PPM1D; RAB4A; RAP1B; RCAN1; ROBO1; ROCK1; RUNX1; RUNX2; SDC2; SETD8; SHMT1; SIRT1; SOS1; SUPT3H; SUV420H1; TCF7L2; TGFBR2; TNIK; USP7; …
Urokinase-type plasminogen activator (uPA) and uPAR-mediated signaling	208	1285	11.3599	1.70007	4.22071e-15	7.04014e-12	3.20007e-13	1.07712e-12	CCND2; DNMT3A; HGF; KPNA2; MTDH; PAK2; PTEN; TBC1D4; ULK1; ULK2; ABCC1; AKT3; ASAP2; CDH1; CDK5R1; CHN2; CHRDL1; CLU; DKK1; DOCK4; E2F3; EGR1; ENAH; FBXO11; FGFR2; FN1; FOXG1; FOXO3; FOXO4; G6PC; GAB1; HIF1A; HNRNPA1; KRAS; MAF; MAPK1; MED1; NCAM1; NF1; PPARGC1A; PPM1D; RAB4A; RAP1B; RCAN1; ROBO1; ROCK1; RUNX1; RUNX2; SDC2; SETD8; SHMT1; SIRT1; SOS1; SUPT3H; SUV420H1; TCF7L2; TGFBR2; TNIK; USP7; …
EGF receptor (ErbB1) signaling pathway	208	1285	11.3599	1.70007	4.22071e-15	7.04014e-12	3.20007e-13	1.07712e-12	CCND2; DNMT3A; HGF; KPNA2; MTDH; PAK2; PTEN; TBC1D4; ULK1; ULK2; ABCC1; AKT3; ASAP2; CDH1; CDK5R1; CHN2; CHRDL1; CLU; DKK1; DOCK4; E2F3; EGR1; ENAH; FBXO11; FGFR2; FN1; FOXG1; FOXO3; FOXO4; G6PC; GAB1; HIF1A; HNRNPA1; KRAS; MAF; MAPK1; MED1; NCAM1; NF1; PPARGC1A; PPM1D; RAB4A; RAP1B; RCAN1; ROBO1; ROCK1; RUNX1; RUNX2; SDC2; SETD8; SHMT1; SIRT1; SOS1; SUPT3H; SUV420H1; TCF7L2; TGFBR2; TNIK; USP7; …
S1P1 pathway	208	1285	11.3599	1.70007	4.22071e-15	7.04014e-12	3.20007e-13	1.07712e-12	CCND2; DNMT3A; HGF; KPNA2; MTDH; PAK2; PTEN; TBC1D4; ULK1; ULK2; ABCC1; AKT3; ASAP2; CDH1; CDK5R1; CHN2; CHRDL1; CLU; DKK1; DOCK4; E2F3; EGR1; ENAH; FBXO11; FGFR2; FN1; FOXG1; FOXO3; FOXO4; G6PC; GAB1; HIF1A; HNRNPA1; KRAS; MAF; MAPK1; MED1; NCAM1; NF1; PPARGC1A; PPM1D; RAB4A; RAP1B; RCAN1; ROBO1; ROCK1; RUNX1; RUNX2; SDC2; SETD8; SHMT1; SIRT1; SOS1; SUPT3H; SUV420H1; TCF7L2; TGFBR2; TNIK; USP7; …
Arf6 trafficking events	208	1285	11.3599	1.70007	4.22071e-15	7.04014e-12	3.20007e-13	1.07712e-12	CCND2; DNMT3A; HGF; KPNA2; MTDH; PAK2; PTEN; TBC1D4; ULK1; ULK2; ABCC1; AKT3; ASAP2; CDH1; CDK5R1; CHN2; CHRDL1; CLU; DKK1; DOCK4; E2F3; EGR1; ENAH; FBXO11; FGFR2; FN1; FOXG1; FOXO3; FOXO4; G6PC; GAB1; HIF1A; HNRNPA1; KRAS; MAF; MAPK1; MED1; NCAM1; NF1; PPARGC1A; PPM1D; RAB4A; RAP1B; RCAN1; ROBO1; ROCK1; RUNX1; RUNX2; SDC2; SETD8; SHMT1; SIRT1; SOS1; SUPT3H; SUV420H1; TCF7L2; TGFBR2; TNIK; USP7; …
EGFR-dependent Endothelin signaling events	208	1286	11.3599	1.69875	4.58436e-15	7.6467e-12	3.32465e-13	1.11905e-12	CCND2; DNMT3A; HGF; KPNA2; MTDH; PAK2; PTEN; TBC1D4; ULK1; ULK2; ABCC1; AKT3; ASAP2; CDH1; CDK5R1; CHN2; CHRDL1; CLU; DKK1; DOCK4; E2F3; EGR1; ENAH; FBXO11; FGFR2; FN1; FOXG1; FOXO3; FOXO4; G6PC; GAB1; HIF1A; HNRNPA1; KRAS; MAF; MAPK1; MED1; NCAM1; NF1; PPARGC1A; PPM1D; RAB4A; RAP1B; RCAN1; ROBO1; ROCK1; RUNX1; RUNX2; SDC2; SETD8; SHMT1; SIRT1; SOS1; SUPT3H; SUV420H1; TCF7L2; TGFBR2; TNIK; USP7; …
PAR1-mediated thrombin signaling events	209	1296	11.4145	1.69374	5.34522e-15	8.91583e-12	3.49617e-13	1.17679e-12	CCND2; DNMT3A; HGF; KPNA2; MTDH; PAK2; PTEN; TBC1D4; ULK1; ULK2; ABCC1; AKT3; ASAP2; CDH1; CDK5R1; CHN2; CHRDL1; CLU; DKK1; DOCK4; E2F3; EGR1; ENAH; FBXO11; FGFR2; FN1; FOXG1; FOXO3; FOXO4; G6PC; GAB1; HIF1A; HNRNPA1; KRAS; MAF; MAPK1; MED1; NCAM1; NF1; PPARGC1A; PPM1D; RAB4A; RAP1B; RCAN1; ROBO1; ROCK1; RUNX1; RUNX2; SDC2; SETD8; SHMT1; SIRT1; SOS1; SUPT3H; SUV420H1; TCF7L2; TGFBR2; TNIK; USP7; …
Thrombin/protease-activated receptor (PAR) pathway	209	1297	11.4145	1.69244	5.8016e-15	9.67707e-12	3.49617e-13	1.17679e-12	CCND2; DNMT3A; HGF; KPNA2; MTDH; PAK2; PTEN; TBC1D4; ULK1; ULK2; ABCC1; AKT3; ASAP2; CDH1; CDK5R1; CHN2; CHRDL1; CLU; DKK1; DOCK4; E2F3; EGR1; ENAH; FBXO11; FGFR2; FN1; FOXG1; FOXO3; FOXO4; G6PC; GAB1; HIF1A; HNRNPA1; KRAS; MAF; MAPK1; MED1; NCAM1; NF1; PPARGC1A; PPM1D; RAB4A; RAP1B; RCAN1; ROBO1; ROCK1; RUNX1; RUNX2; SDC2; SETD8; SHMT1; SIRT1; SOS1; SUPT3H; SUV420H1; TCF7L2; TGFBR2; TNIK; USP7; …
Syndecan-1-mediated signaling events	209	1297	11.4145	1.69244	5.8016e-15	9.67707e-12	3.49617e-13	1.17679e-12	CCND2; DNMT3A; HGF; KPNA2; MTDH; PAK2; PTEN; TBC1D4; ULK1; ULK2; ABCC1; AKT3; ASAP2; CDH1; CDK5R1; CHN2; CHRDL1; CLU; DKK1; DOCK4; E2F3; EGR1; ENAH; FBXO11; FGFR2; FN1; FOXG1; FOXO3; FOXO4; G6PC; GAB1; HIF1A; HNRNPA1; KRAS; MAF; MAPK1; MED1; NCAM1; NF1; PPARGC1A; PPM1D; RAB4A; RAP1B; RCAN1; ROBO1; ROCK1; RUNX1; RUNX2; SDC2; SETD8; SHMT1; SIRT1; SOS1; SUPT3H; SUV420H1; TCF7L2; TGFBR2; TNIK; USP7; …
GMCSF-mediated signaling events	208	1289	11.3599	1.69479	5.86888e-15	9.78929e-12	3.49617e-13	1.17679e-12	CCND2; DNMT3A; HGF; KPNA2; MTDH; PAK2; PTEN; TBC1D4; ULK1; ULK2; ABCC1; AKT3; ASAP2; CDH1; CDK5R1; CHN2; CHRDL1; CLU; DKK1; DOCK4; E2F3; EGR1; ENAH; FBXO11; FGFR2; FN1; FOXG1; FOXO3; FOXO4; G6PC; GAB1; HIF1A; HNRNPA1; KRAS; MAF; MAPK1; MED1; NCAM1; NF1; PPARGC1A; PPM1D; RAB4A; RAP1B; RCAN1; ROBO1; ROCK1; RUNX1; RUNX2; SDC2; SETD8; SHMT1; SIRT1; SOS1; SUPT3H; SUV420H1; TCF7L2; TGFBR2; TNIK; USP7; …
IL5-mediated signaling events	208	1289	11.3599	1.69479	5.86888e-15	9.78929e-12	3.49617e-13	1.17679e-12	CCND2; DNMT3A; HGF; KPNA2; MTDH; PAK2; PTEN; TBC1D4; ULK1; ULK2; ABCC1; AKT3; ASAP2; CDH1; CDK5R1; CHN2; CHRDL1; CLU; DKK1; DOCK4; E2F3; EGR1; ENAH; FBXO11; FGFR2; FN1; FOXG1; FOXO3; FOXO4; G6PC; GAB1; HIF1A; HNRNPA1; KRAS; MAF; MAPK1; MED1; NCAM1; NF1; PPARGC1A; PPM1D; RAB4A; RAP1B; RCAN1; ROBO1; ROCK1; RUNX1; RUNX2; SDC2; SETD8; SHMT1; SIRT1; SOS1; SUPT3H; SUV420H1; TCF7L2; TGFBR2; TNIK; USP7; …
PDGF receptor signaling network	208	1290	11.3599	1.69348	6.3706e-15	1.06262e-11	3.66419e-13	1.23334e-12	CCND2; DNMT3A; HGF; KPNA2; MTDH; PAK2; PTEN; TBC1D4; ULK1; ULK2; ABCC1; AKT3; ASAP2; CDH1; CDK5R1; CHN2; CHRDL1; CLU; DKK1; DOCK4; E2F3; EGR1; ENAH; FBXO11; FGFR2; FN1; FOXG1; FOXO3; FOXO4; G6PC; GAB1; HIF1A; HNRNPA1; KRAS; MAF; MAPK1; MED1; NCAM1; NF1; PPARGC1A; PPM1D; RAB4A; RAP1B; RCAN1; ROBO1; ROCK1; RUNX1; RUNX2; SDC2; SETD8; SHMT1; SIRT1; SOS1; SUPT3H; SUV420H1; TCF7L2; TGFBR2; TNIK; USP7; …
IL3-mediated signaling events	208	1292	11.3599	1.69086	7.50294e-15	1.25149e-11	4.17163e-13	1.40414e-12	CCND2; DNMT3A; HGF; KPNA2; MTDH; PAK2; PTEN; TBC1D4; ULK1; ULK2; ABCC1; AKT3; ASAP2; CDH1; CDK5R1; CHN2; CHRDL1; CLU; DKK1; DOCK4; E2F3; EGR1; ENAH; FBXO11; FGFR2; FN1; FOXG1; FOXO3; FOXO4; G6PC; GAB1; HIF1A; HNRNPA1; KRAS; MAF; MAPK1; MED1; NCAM1; NF1; PPARGC1A; PPM1D; RAB4A; RAP1B; RCAN1; ROBO1; ROCK1; RUNX1; RUNX2; SDC2; SETD8; SHMT1; SIRT1; SOS1; SUPT3H; SUV420H1; TCF7L2; TGFBR2; TNIK; USP7; …
VEGF and VEGFR signaling network	209	1301	11.4145	1.68723	8.03924e-15	1.34094e-11	4.2433e-13	1.42826e-12	CCND2; DNMT3A; HGF; KPNA2; MTDH; PAK2; PTEN; TBC1D4; ULK1; ULK2; ABCC1; AKT3; ASAP2; CDH1; CDK5R1; CHN2; CHRDL1; CLU; DKK1; DOCK4; E2F3; EGR1; ENAH; FBXO11; FGFR2; FN1; FOXG1; FOXO3; FOXO4; G6PC; GAB1; HIF1A; HNRNPA1; KRAS; MAF; MAPK1; MED1; NCAM1; NF1; PPARGC1A; PPM1D; RAB4A; RAP1B; RCAN1; ROBO1; ROCK1; RUNX1; RUNX2; SDC2; SETD8; SHMT1; SIRT1; SOS1; SUPT3H; SUV420H1; TCF7L2; TGFBR2; TNIK; USP7; …
Signaling events mediated by VEGFR1 and VEGFR2	208	1293	11.3599	1.68955	8.14062e-15	1.35786e-11	4.2433e-13	1.42826e-12	CCND2; DNMT3A; HGF; KPNA2; MTDH; PAK2; PTEN; TBC1D4; ULK1; ULK2; ABCC1; AKT3; ASAP2; CDH1; CDK5R1; CHN2; CHRDL1; CLU; DKK1; DOCK4; E2F3; EGR1; ENAH; FBXO11; FGFR2; FN1; FOXG1; FOXO3; FOXO4; G6PC; GAB1; HIF1A; HNRNPA1; KRAS; MAF; MAPK1; MED1; NCAM1; NF1; PPARGC1A; PPM1D; RAB4A; RAP1B; RCAN1; ROBO1; ROCK1; RUNX1; RUNX2; SDC2; SETD8; SHMT1; SIRT1; SOS1; SUPT3H; SUV420H1; TCF7L2; TGFBR2; TNIK; USP7; …
Alpha9 beta1 integrin signaling events	209	1302	11.4145	1.68594	8.719e-15	1.45433e-11	4.38084e-13	1.47456e-12	CCND2; DNMT3A; HGF; KPNA2; MTDH; PAK2; PTEN; TBC1D4; ULK1; ULK2; ABCC1; AKT3; ASAP2; CDH1; CDK5R1; CHN2; CHRDL1; CLU; DKK1; DOCK4; E2F3; EGR1; ENAH; FBXO11; FGFR2; FN1; FOXG1; FOXO3; FOXO4; G6PC; GAB1; HIF1A; HNRNPA1; KRAS; MAF; MAPK1; MED1; NCAM1; NF1; PPARGC1A; PPM1D; RAB4A; RAP1B; RCAN1; ROBO1; ROCK1; RUNX1; RUNX2; SDC2; SETD8; SHMT1; SIRT1; SOS1; SUPT3H; SUV420H1; TCF7L2; TGFBR2; TNIK; USP7; …
Glypican pathway	213	1335	11.633	1.67573	8.92978e-15	1.48949e-11	4.38084e-13	1.47456e-12	CCND2; DNMT3A; HGF; KPNA2; MTDH; PAK2; PTEN; TBC1D4; ULK1; ULK2; ABCC1; AKT3; ASAP2; CDH1; CDK5R1; CHN2; CHRDL1; CLU; DKK1; DOCK4; E2F3; EGR1; ENAH; FBXO11; FGFR2; FN1; FOXG1; FOXO3; FOXO4; G6PC; GAB1; HIF1A; HNRNPA1; KRAS; MAF; MAPK1; MED1; NCAM1; NF1; PPARGC1A; PPM1D; RAB4A; RAP1B; RCAN1; ROBO1; ROCK1; RUNX1; RUNX2; SDC2; SETD8; SHMT1; SIRT1; SOS1; SUPT3H; SUV420H1; TCF7L2; TGFBR2; TNIK; USP7; …
Endothelins	209	1304	11.4145	1.68335	1.02512e-14	1.7099e-11	4.81317e-13	1.62008e-12	CCND2; DNMT3A; HGF; KPNA2; MTDH; PAK2; PTEN; TBC1D4; ULK1; ULK2; ABCC1; AKT3; ASAP2; CDH1; CDK5R1; CHN2; CHRDL1; CLU; DKK1; DOCK4; E2F3; EGR1; ENAH; FBXO11; FGFR2; FN1; FOXG1; FOXO3; FOXO4; G6PC; GAB1; HIF1A; HNRNPA1; KRAS; MAF; MAPK1; MED1; NCAM1; NF1; PPARGC1A; PPM1D; RAB4A; RAP1B; RCAN1; ROBO1; ROCK1; RUNX1; RUNX2; SDC2; SETD8; SHMT1; SIRT1; SOS1; SUPT3H; SUV420H1; TCF7L2; TGFBR2; TNIK; USP7; …
Glypican 1 network	208	1296	11.3599	1.68564	1.03881e-14	1.73274e-11	4.81317e-13	1.62008e-12	CCND2; DNMT3A; HGF; KPNA2; MTDH; PAK2; PTEN; TBC1D4; ULK1; ULK2; ABCC1; AKT3; ASAP2; CDH1; CDK5R1; CHN2; CHRDL1; CLU; DKK1; DOCK4; E2F3; EGR1; ENAH; FBXO11; FGFR2; FN1; FOXG1; FOXO3; FOXO4; G6PC; GAB1; HIF1A; HNRNPA1; KRAS; MAF; MAPK1; MED1; NCAM1; NF1; PPARGC1A; PPM1D; RAB4A; RAP1B; RCAN1; ROBO1; ROCK1; RUNX1; RUNX2; SDC2; SETD8; SHMT1; SIRT1; SOS1; SUPT3H; SUV420H1; TCF7L2; TGFBR2; TNIK; USP7; …
Sphingosine 1-phosphate (S1P) pathway	209	1308	11.4145	1.6782	1.4145e-14	2.35939e-11	6.37674e-13	2.14636e-12	CCND2; DNMT3A; HGF; KPNA2; MTDH; PAK2; PTEN; TBC1D4; ULK1; ULK2; ABCC1; AKT3; ASAP2; CDH1; CDK5R1; CHN2; CHRDL1; CLU; DKK1; DOCK4; E2F3; EGR1; ENAH; FBXO11; FGFR2; FN1; FOXG1; FOXO3; FOXO4; G6PC; GAB1; HIF1A; HNRNPA1; KRAS; MAF; MAPK1; MED1; NCAM1; NF1; PPARGC1A; PPM1D; RAB4A; RAP1B; RCAN1; ROBO1; ROCK1; RUNX1; RUNX2; SDC2; SETD8; SHMT1; SIRT1; SOS1; SUPT3H; SUV420H1; TCF7L2; TGFBR2; TNIK; USP7; …
Proteoglycan syndecan-mediated signaling events	213	1342	11.633	1.66699	1.55764e-14	2.59815e-11	6.83724e-13	2.30136e-12	CCND2; DNMT3A; HGF; KPNA2; MTDH; PAK2; PTEN; TBC1D4; ULK1; ULK2; ABCC1; AKT3; ASAP2; CDH1; CDK5R1; CHN2; CHRDL1; CLU; DKK1; DOCK4; E2F3; EGR1; ENAH; FBXO11; FGFR2; FN1; FOXG1; FOXO3; FOXO4; G6PC; GAB1; HIF1A; HNRNPA1; KRAS; MAF; MAPK1; MED1; NCAM1; NF1; PPARGC1A; PPM1D; RAB4A; RAP1B; RCAN1; ROBO1; ROCK1; RUNX1; RUNX2; SDC2; SETD8; SHMT1; SIRT1; SOS1; SUPT3H; SUV420H1; TCF7L2; TGFBR2; TNIK; USP7; …
Integrin family cell surface interactions	216	1375	11.7968	1.6499	2.97322e-14	4.95933e-11	1.27162e-12	4.28018e-12	CCND2; DNMT3A; HGF; KPNA2; MTDH; PAK2; PTEN; TBC1D4; ULK1; ULK2; ABCC1; AKT3; ASAP2; CDH1; CDK5R1; CHN2; CHRDL1; CLU; DKK1; DOCK4; E2F3; EDIL3; EGR1; ENAH; FBXO11; FGFR2; FN1; FOXG1; FOXO3; FOXO4; G6PC; GAB1; HIF1A; HNRNPA1; KRAS; MAF; MAPK1; MED1; NCAM1; NF1; PPARGC1A; PPM1D; RAB4A; RAP1B; RCAN1; ROBO1; ROCK1; RUNX1; RUNX2; SDC2; SETD8; SHMT1; SIRT1; SOS1; SUPT3H; SUV420H1; TCF7L2; TGFBR2; TNIK;…
Beta1 integrin cell surface interactions	212	1348	11.5784	1.65178	4.73215e-14	7.89322e-11	1.9733e-12	6.64199e-12	CCND2; DNMT3A; HGF; KPNA2; MTDH; PAK2; PTEN; TBC1D4; ULK1; ULK2; ABCC1; AKT3; ASAP2; CDH1; CDK5R1; CHN2; CHRDL1; CLU; DKK1; DOCK4; E2F3; EGR1; ENAH; FBXO11; FGFR2; FN1; FOXG1; FOXO3; FOXO4; G6PC; GAB1; HIF1A; HNRNPA1; KRAS; MAF; MAPK1; MED1; NCAM1; NF1; PPARGC1A; PPM1D; RAB4A; RAP1B; RCAN1; ROBO1; ROCK1; RUNX1; RUNX2; SDC2; SETD8; SHMT1; SIRT1; SOS1; SUPT3H; SUV420H1; TCF7L2; TGFBR2; TNIK; USP7; …
Axon guidance	56	219	3.05844	2.6859	3.78655e-12	6.31597e-09	1.54048e-10	5.18514e-10	CACNA1C; PAK2; PLXNA2; RPS6KA6; SRGAP1; TRPC3; ABL2; CDK5R1; ENAH; KRAS; MAPK1; NCAM1; PLXNA4; RAP1B; ROBO1; ROCK1; SEMA3A; SOS1; YWHAB; ALCAM; CACNA1I; DCC; AGAP2; ANK2; CACNB1; CACNB3; CNTN2; CNTNAP1; DCX; DPYSL4; GFRA1; MAP2K1; MET; MYH9; PLCG1; RGMB; RPS6KA4; RRAS; SPTBN2; ANK1; ARHGAP35; CREB1; DLG3; EGFR; LIMK1; PTK2; PTPN11; RHOC; ROCK2; RPS6KA1; SEMA6A; SH3GL2; TRPC5; TRPC7; UNC5A; UNC5D;
Regulation of CDC42 activity	128	768	6.99072	1.75051	1.69815e-10	2.83251e-07	6.74407e-09	2.27e-08	CCND2; KPNA2; PAK2; PTEN; SRGAP1; CDH1; CDK5R1; CHN2; DKK1; EGR1; ENAH; FOXG1; FOXO3; FOXO4; GAB1; HIF1A; HNRNPA1; KRAS; MAF; MAPK1; MED1; NF1; PPARGC1A; RCAN1; ROCK1; RUNX1; RUNX2; SOS1; SUV420H1; TCF7L2; TGFBR2; TNIK; YWHAB; YWHAG; YWHAH; CBL; CTNNBIP1; DIAPH1; IL6ST; MSN; NKX2-5; PRKACB; PRKG1; RB1; TAOK1; XIAP; ABR; ALDOA; ARHGAP1; BCL2; CAMK4; CBFB; CCND1; CDK6; CRTC1; CTDSP2; CTDSPL; DCP1A;…
CDC42 signaling events	125	755	6.82687	1.73892	4.32077e-10	7.20705e-07	1.67606e-08	5.64148e-08	CCND2; KPNA2; PAK2; PTEN; SRGAP1; CDH1; CDK5R1; CHN2; DKK1; EGR1; ENAH; FOXG1; FOXO3; FOXO4; GAB1; HIF1A; HNRNPA1; KRAS; MAF; MAPK1; MED1; NF1; PPARGC1A; RCAN1; ROCK1; RUNX1; RUNX2; SOS1; SUV420H1; TCF7L2; TGFBR2; TNIK; YWHAB; YWHAG; YWHAH; CBL; CTNNBIP1; DIAPH1; IL6ST; MSN; NKX2-5; PRKACB; PRKG1; RB1; TAOK1; XIAP; ABR; ALDOA; ARHGAP1; BCL2; CAMK4; CBFB; CCND1; CDK6; CRTC1; CTDSP2; CTDSPL; DCP1A;…
Developmental Biology	78	432	4.25997	1.89647	2.1952e-08	3.66159e-05	8.3218e-07	2.80105e-06	CACNA1C; PAK2; PLXNA2; RPS6KA6; SRGAP1; TRPC3; ABL2; ACVR2A; CDK5R1; ENAH; FOXO3; KRAS; MAPK1; MED1; MED13; NCAM1; NEUROD1; PLXNA4; PPARGC1A; RAP1B; ROBO1; ROCK1; SEMA3A; SOS1; YWHAB; ACVR2B; ALCAM; CACNA1I; CDON; DCC; NCOA3; AGAP2; ANK2; CACNB1; CACNB3; CNTN2; CNTNAP1; DCX; DPYSL4; GFRA1; HNF4A; HNF4G; KLF4; MAP2K1; MET; MYH9; NCOA1; NOTCH1; PLCG1; RGMB; RPS6KA4; RRAS; SMAD4; SPTBN2; WNT1; ANK1;…
Integrin-linked kinase signaling	106	654	5.78919	1.70236	3.0038e-08	5.01034e-05	1.11341e-06	3.74765e-06	CCND2; KPNA2; PAK2; PTEN; CDH1; CDK5R1; DKK1; EGR1; FOXG1; FOXO3; FOXO4; GAB1; HIF1A; HNRNPA1; KRAS; MAF; MAPK1; MED1; NF1; PPARGC1A; RCAN1; RUNX1; RUNX2; SOS1; SUV420H1; TCF7L2; TGFBR2; TNIK; YWHAB; YWHAG; YWHAH; CTNNBIP1; DIAPH1; IL6ST; LIMS1; NKX2-5; PRKACB; PRKG1; RB1; RICTOR; TAOK1; XIAP; ALDOA; BCL2; CAMK4; CBFB; CCND1; CDC37; CDK6; CRTC1; CTDSP2; CTDSPL; DCP1A; E2F5; FOSB; FOSL1; HDAC1; HK…
AP-1 transcription factor network	101	621	5.51611	1.70826	5.36248e-08	8.94461e-05	1.94448e-06	6.54497e-06	CCND2; KPNA2; PAK2; PTEN; CDH1; CDK5R1; DKK1; EGR1; FOXG1; FOXO3; FOXO4; GAB1; HIF1A; HNRNPA1; KRAS; MAF; MAPK1; MED1; NF1; PPARGC1A; RCAN1; RUNX1; RUNX2; SOS1; SUV420H1; TCF7L2; TGFBR2; TNIK; YWHAB; YWHAG; YWHAH; CTNNBIP1; IL6ST; NKX2-5; PRKACB; PRKG1; RB1; TAOK1; XIAP; ALDOA; BCL2; CAMK4; CBFB; CCND1; CDK6; CRTC1; CTDSP2; CTDSPL; DCP1A; E2F5; FOSB; FOSL1; HDAC1; HK1; HNF4A; IKZF1; IL6R; KLF4; L…
ALK1 signaling events	61	321	3.33151	1.99605	1.17715e-07	0.000196349	4.17764e-06	1.40616e-05	KPNA2; PAK2; ACVR2A; EGR1; FOXG1; FOXO3; FOXO4; INHBA; MAF; MAPK1; PPARGC1A; RCAN1; RUNX1; RUNX2; SOS1; TGFBR2; YWHAB; YWHAG; YWHAH; ACVR2B; NKX2-5; PRKG1; TAOK1; XIAP; ACVRL1; BCL2; CAMK4; CBFB; CCND1; CTDSP2; CTDSPL; DCP1A; E2F5; FOSL1; HDAC1; HNF4A; IKZF1; MAPT; NCOA1; NEDD4L; POU2F1; PPM1A; RPS6KA4; SERPINE1; SMAD4; TGFBRAP1; TGIF2; USF1; CAMK2B; CASP3; CREB1; DUSP16; EIF4EBP1; ENG; NR3C1; RB…
E-cadherin signaling events	55	280	3.00382	2.06327	1.58466e-07	0.000264321	5.50669e-06	1.85351e-05	CCND2; HGF; CDH1; DKK1; ENAH; FGFR2; GAB1; HNRNPA1; MAPK1; MED1; NCAM1; RAP1B; ROBO1; ROCK1; RUNX2; SDC2; SOS1; TCF7L2; TNIK; YWHAB; YWHAG; YWHAH; CBL; CTNNBIP1; DIAPH1; ADAM10; CAMK4; CCND1; CDK6; CTDSP2; CTNND1; GFRA1; HDAC1; KLF4; LEF1; MET; PIP5K1A; PLCG1; RET; TBL1XR1; VCL; CASP3; CCND3; DVL2; EGFR; FRS2; GIT1; IGF2BP1; PTPN11; RPS6KA1; TBL1X; TCF4; TCF7L1; TJP1; ZMIZ1;
ALK1 pathway	61	324	3.33151	1.97757	1.65655e-07	0.000276313	5.63904e-06	1.89806e-05	KPNA2; PAK2; ACVR2A; EGR1; FOXG1; FOXO3; FOXO4; INHBA; MAF; MAPK1; PPARGC1A; RCAN1; RUNX1; RUNX2; SOS1; TGFBR2; YWHAB; YWHAG; YWHAH; ACVR2B; NKX2-5; PRKG1; TAOK1; XIAP; ACVRL1; BCL2; CAMK4; CBFB; CCND1; CTDSP2; CTDSPL; DCP1A; E2F5; FOSL1; HDAC1; HNF4A; IKZF1; MAPT; NCOA1; NEDD4L; POU2F1; PPM1A; RPS6KA4; SERPINE1; SMAD4; TGFBRAP1; TGIF2; USF1; CAMK2B; CASP3; CREB1; DUSP16; EIF4EBP1; ENG; NR3C1; RB…
E-cadherin signaling in the nascent adherens junction	54	275	2.94921	2.0626	2.0711e-07	0.00034546	6.77372e-06	2.27998e-05	CCND2; HGF; CDH1; DKK1; ENAH; FGFR2; GAB1; HNRNPA1; MAPK1; MED1; NCAM1; RAP1B; ROBO1; ROCK1; RUNX2; SDC2; SOS1; TCF7L2; TNIK; YWHAB; YWHAG; YWHAH; CBL; CTNNBIP1; DIAPH1; ADAM10; CAMK4; CCND1; CDK6; CTDSP2; CTNND1; GFRA1; HDAC1; KLF4; LEF1; MET; PLCG1; RET; TBL1XR1; VCL; CASP3; CCND3; DVL2; EGFR; FRS2; GIT1; IGF2BP1; PTPN11; RPS6KA1; TBL1X; TCF4; TCF7L1; TJP1; ZMIZ1;
Stabilization and expansion of the E-cadherin adherens junction	54	275	2.94921	2.0626	2.0711e-07	0.00034546	6.77372e-06	2.27998e-05	CCND2; HGF; CDH1; DKK1; ENAH; FGFR2; GAB1; HNRNPA1; MAPK1; MED1; NCAM1; RAP1B; ROBO1; ROCK1; RUNX2; SDC2; SOS1; TCF7L2; TNIK; YWHAB; YWHAG; YWHAH; CBL; CTNNBIP1; DIAPH1; ADAM10; CAMK4; CCND1; CDK6; CTDSP2; CTNND1; GFRA1; HDAC1; KLF4; LEF1; MET; PLCG1; RET; TBL1XR1; VCL; CASP3; CCND3; DVL2; EGFR; FRS2; GIT1; IGF2BP1; PTPN11; RPS6KA1; TBL1X; TCF4; TCF7L1; TJP1; ZMIZ1;
Posttranslational regulation of adherens junction stability and dissassembly	47	231	2.5669	2.13722	4.3017e-07	0.000717524	1.37985e-05	4.64448e-05	CCND2; HGF; CDH1; DKK1; FGFR2; GAB1; HNRNPA1; MAPK1; MED1; NCAM1; ROBO1; RUNX2; SDC2; SOS1; TCF7L2; TNIK; YWHAB; YWHAG; YWHAH; CBL; CTNNBIP1; ADAM10; CAMK4; CCND1; CDK6; CTDSP2; CTNND1; GFRA1; HDAC1; KLF4; LEF1; MET; PLCG1; RET; TBL1XR1; CASP3; CCND3; DVL2; EGFR; FRS2; IGF2BP1; PTPN11; RPS6KA1; TBL1X; TCF4; TCF7L1; ZMIZ1;
Trk receptor signaling mediated by PI3K and PLC-gamma	20	63	1.0923	3.33523	8.20892e-07	0.00136925	2.58349e-05	8.69582e-05	TRPC3; CDK5R1; EGR1; EHD4; FOXO3; GAB1; KRAS; MAPK1; RAP1B; SOS1; YWHAB; YWHAG; YWHAH; AGAP2; CAMK4; CCND1; MAP2K1; PLCG1; CREB1; RPS6KA1;
N-cadherin signaling events	49	251	2.67613	2.05061	8.92185e-07	0.00148816	2.75586e-05	9.27601e-05	CCND2; HGF; CDH1; DKK1; FGFR2; GAB1; HNRNPA1; MAPK1; MED1; NCAM1; ROBO1; ROCK1; RUNX2; SDC2; SOS1; TCF7L2; TNIK; YWHAB; YWHAG; YWHAH; CBL; CTNNBIP1; ADAM10; CAMK4; CCND1; CDK6; CTDSP2; CTNND1; DAGLA; GFRA1; HDAC1; KLF4; LEF1; MET; PLCG1; RET; TBL1XR1; CASP3; CCND3; DVL2; EGFR; FRS2; IGF2BP1; PTPN11; RPS6KA1; TBL1X; TCF4; TCF7L1; ZMIZ1;
Regulation of nuclear SMAD2/3 signaling	56	305	3.05844	1.92859	1.20632e-06	0.00201214	3.53008e-05	0.00011882	KPNA2; PAK2; EGR1; FOXG1; FOXO3; FOXO4; MAF; MAPK1; PPARGC1A; RCAN1; RUNX1; RUNX2; SOS1; TGFBR2; YWHAB; YWHAG; YWHAH; NKX2-5; PRKG1; TAOK1; XIAP; BCL2; CAMK4; CBFB; CCND1; CTDSP2; CTDSPL; DCP1A; E2F5; FOSL1; HDAC1; HNF4A; IKZF1; MAPT; NCOA1; NEDD4L; POU2F1; PPM1A; RPS6KA4; SERPINE1; SMAD4; TGFBRAP1; TGIF2; USF1; CAMK2B; CASP3; CREB1; DUSP16; EIF4EBP1; NR3C1; RBBP4; RCAN2; SIN3A; SMURF1; SNIP1; TC…
Regulation of cytoplasmic and nuclear SMAD2/3 signaling	56	305	3.05844	1.92859	1.20632e-06	0.00201214	3.53008e-05	0.00011882	KPNA2; PAK2; EGR1; FOXG1; FOXO3; FOXO4; MAF; MAPK1; PPARGC1A; RCAN1; RUNX1; RUNX2; SOS1; TGFBR2; YWHAB; YWHAG; YWHAH; NKX2-5; PRKG1; TAOK1; XIAP; BCL2; CAMK4; CBFB; CCND1; CTDSP2; CTDSPL; DCP1A; E2F5; FOSL1; HDAC1; HNF4A; IKZF1; MAPT; NCOA1; NEDD4L; POU2F1; PPM1A; RPS6KA4; SERPINE1; SMAD4; TGFBRAP1; TGIF2; USF1; CAMK2B; CASP3; CREB1; DUSP16; EIF4EBP1; NR3C1; RBBP4; RCAN2; SIN3A; SMURF1; SNIP1; TC…
TGF-beta receptor signaling	56	305	3.05844	1.92859	1.20632e-06	0.00201214	3.53008e-05	0.00011882	KPNA2; PAK2; EGR1; FOXG1; FOXO3; FOXO4; MAF; MAPK1; PPARGC1A; RCAN1; RUNX1; RUNX2; SOS1; TGFBR2; YWHAB; YWHAG; YWHAH; NKX2-5; PRKG1; TAOK1; XIAP; BCL2; CAMK4; CBFB; CCND1; CTDSP2; CTDSPL; DCP1A; E2F5; FOSL1; HDAC1; HNF4A; IKZF1; MAPT; NCOA1; NEDD4L; POU2F1; PPM1A; RPS6KA4; SERPINE1; SMAD4; TGFBRAP1; TGIF2; USF1; CAMK2B; CASP3; CREB1; DUSP16; EIF4EBP1; NR3C1; RBBP4; RCAN2; SIN3A; SMURF1; SNIP1; TC…
E2F transcription factor network	21	73	1.14691	3.02226	2.66159e-06	0.00443953	7.65437e-05	0.00025764	E2F3; SIRT1; YY1; CDC6; RB1; TYMS; CCNE2; CDC25A; CES4A; E2F5; HDAC1; SERPINE1; TFDP2; TP73; WASF1; CBX5; CCND3; CCNE1; E2F2; RBBP4; RRM1;
FGF signaling pathway	16	48	0.873839	3.50226	5.00633e-06	0.00835056	0.000141535	0.000476395	HGF; CDH1; FGFR2; GAB1; MAPK1; NCAM1; RUNX2; SDC2; SOS1; CBL; CTNND1; MET; PLCG1; FRS2; PTPN11; RPS6KA1;
Neurotrophic factor-mediated Trk receptor signaling	25	101	1.36537	2.60039	6.2941e-06	0.0104986	0.000174976	0.000588956	TRPC3; CDK5R1; EGR1; EHD4; FOXO3; GAB1; KRAS; MAPK1; RAP1B; SOS1; YWHAB; YWHAG; YWHAH; AGAP2; CAMK4; CCND1; MAP2K1; NEDD4L; PLCG1; ARHGAP32; CREB1; FRS2; GAB2; PTPN11; RPS6KA1;
NCAM signaling for neurite out-growth	17	57	0.928454	3.13359	1.38379e-05	0.0230816	0.000378387	0.00127362	CACNA1C; KRAS; MAPK1; NCAM1; RAP1B; SOS1; YWHAB; CACNA1I; CACNB1; CACNB3; CNTN2; GFRA1; MAP2K1; SPTBN2; CREB1; PTK2; PTPN11;
Receptor-ligand binding initiates the second proteolytic cleavage of Notch receptor	6	9	0.32769	7.00549	4.81881e-05	0.0803777	0.00129642	0.00436363	ADAM10; DLL1; JAG1; NOTCH1; NOTCH2; JAG2;
Notch signaling pathway	22	94	1.20153	2.45887	5.60005e-05	0.0934088	0.00144333	0.00485814	HIF1A; RCAN1; RUNX2; YY1; CBL; RB1; ADAM10; APH1A; CCND1; DLL1; HDAC1; JAG1; NCOA1; NOTCH1; NOTCH2; SPEN; DTX1; MAML1; MARK2; RAB11A; TCF3; JAG2;
Notch-mediated HES/HEY network	22	94	1.20153	2.45887	5.60005e-05	0.0934088	0.00144333	0.00485814	HIF1A; RCAN1; RUNX2; YY1; CBL; RB1; ADAM10; APH1A; CCND1; DLL1; HDAC1; JAG1; NCOA1; NOTCH1; NOTCH2; SPEN; DTX1; MAML1; MARK2; RAB11A; TCF3; JAG2;
NOTCH	16	57	0.873839	2.94937	5.62449e-05	0.0938165	0.00144333	0.00485814	HIVEP3; MAPK1; YY1; APH1A; DLL1; LEF1; NOTCH2; POFUT1; SMAD4; SPEN; DTX1; MAML1; RELA; SIN3A; TCF3; JAG2;
p75(NTR)-mediated signaling	34	178	1.85691	2.00655	6.30358e-05	0.105144	0.00159309	0.00536221	ADAM17; TRPC3; CDK5R1; EGR1; EHD4; FOXO3; GAB1; KRAS; MAPK1; NDN; RAP1B; SOS1; YWHAB; YWHAG; YWHAH; PRKACB; XIAP; AGAP2; APH1A; CAMK4; CCND1; ERC1; MAP2K1; NEDD4L; PLCG1; ARHGAP32; CASP3; CREB1; FRS2; GAB2; PTPN11; RELA; RHOC; RPS6KA1;
G0 and Early G1	9	21	0.491535	4.50389	6.40724e-05	0.106873	0.00159511	0.00536903	DYRK1A; LIN54; CDC6; CDC25A; E2F5; HDAC1; TFDP2; LIN52; RBBP4;
Syndecan-2-mediated signaling events	19	77	1.03768	2.59253	8.25871e-05	0.137755	0.00202581	0.00681874	HGF; CDH1; FGFR2; FN1; GAB1; MAPK1; NCAM1; NF1; RUNX2; SDC2; SOS1; CBL; CTNND1; MET; PLCG1; CASP3; FRS2; PTPN11; RPS6KA1;
RhoA signaling pathway	37	205	2.02075	1.89598	0.000106533	0.177697	0.00246801	0.00830714	PAK2; PTEN; SRGAP1; CDH1; CHN2; MAPK1; NF1; PPARGC1A; ROCK1; SOS1; DIAPH1; MSN; RB1; ABR; ARHGAP1; BCL2; CBFB; CCND1; F2RL2; IQGAP3; PDGFRA; PIP5K1A; POU2F1; RAP1GDS1; VCL; WASF1; ARHGAP35; ARHGEF3; CREB1; HRK; LIMK1; MAP2K7; MAP3K11; PLD2; ROCK2; SCAI; SH3GL2;
Regulation of RAC1 activity	37	205	2.02075	1.89598	0.000106533	0.177697	0.00246801	0.00830714	PAK2; PTEN; SRGAP1; CDH1; CHN2; MAPK1; NF1; PPARGC1A; ROCK1; SOS1; DIAPH1; MSN; RB1; ABR; ARHGAP1; BCL2; CBFB; CCND1; F2RL2; IQGAP3; PDGFRA; PIP5K1A; POU2F1; RAP1GDS1; VCL; WASF1; ARHGAP35; ARHGEF3; CREB1; HRK; LIMK1; MAP2K7; MAP3K11; PLD2; ROCK2; SCAI; SH3GL2;
Regulation of RhoA activity	37	205	2.02075	1.89598	0.000106533	0.177697	0.00246801	0.00830714	PAK2; PTEN; SRGAP1; CDH1; CHN2; MAPK1; NF1; PPARGC1A; ROCK1; SOS1; DIAPH1; MSN; RB1; ABR; ARHGAP1; BCL2; CBFB; CCND1; F2RL2; IQGAP3; PDGFRA; PIP5K1A; POU2F1; RAP1GDS1; VCL; WASF1; ARHGAP35; ARHGEF3; CREB1; HRK; LIMK1; MAP2K7; MAP3K11; PLD2; ROCK2; SCAI; SH3GL2;
RAC1 signaling pathway	37	205	2.02075	1.89598	0.000106533	0.177697	0.00246801	0.00830714	PAK2; PTEN; SRGAP1; CDH1; CHN2; MAPK1; NF1; PPARGC1A; ROCK1; SOS1; DIAPH1; MSN; RB1; ABR; ARHGAP1; BCL2; CBFB; CCND1; F2RL2; IQGAP3; PDGFRA; PIP5K1A; POU2F1; RAP1GDS1; VCL; WASF1; ARHGAP35; ARHGEF3; CREB1; HRK; LIMK1; MAP2K7; MAP3K11; PLD2; ROCK2; SCAI; SH3GL2;
Signaling by EGFR	22	98	1.20153	2.35851	0.000108738	0.181375	0.00248459	0.00836293	ADAM17; PTEN; GAB1; KRAS; MAPK1; SOS1; YWHAB; CBL; PRKACB; PRKAR1A; RICTOR; ADAM10; ADCY5; CAMK4; MAP2K1; PAG1; PLCG1; SPRY1; CREB1; EGFR; PTPN11; SH3GL2;
Transmission across Chemical Synapses	25	121	1.36537	2.17061	0.000158572	0.264498	0.00357429	0.0120308	RPS6KA6; DNAJC5; GRIK2; MAPK1; SLC38A2; SLC6A1; SNAP25; STX1A; GRIN2B; PRKACB; ADCY5; CACNG2; CAMK4; GABBR2; GABRB1; GNAI2; RRAS; SYT1; VAMP2; CAMK2B; CREB1; GNG2; RPS6KA1; SLC17A7; SLC38A1;
Signaling by FGFR	21	95	1.14691	2.32245	0.000194324	0.324132	0.00432176	0.0145467	PTEN; FGFR2; GAB1; KRAS; MAPK1; SDC2; SOS1; YWHAB; CBL; PRKACB; PRKAR1A; RICTOR; ADCY5; CAMK4; MAP2K1; PLCG1; CREB1; EGFR; FGF10; FRS2; PTPN11;
Netrin-1 signaling	13	45	0.709995	3.03569	0.000200677	0.33473	0.00440434	0.0148247	TRPC3; RAP1B; ROBO1; DCC; AGAP2; PLCG1; RGMB; PTK2; PTPN11; TRPC5; TRPC7; UNC5A; UNC5D;
Glutamate Neurotransmitter Release Cycle	6	11	0.32769	5.73292	0.000223912	0.373485	0.00478639	0.0161106	SLC38A2; SNAP25; STX1A; SYT1; VAMP2; SLC17A7;
GRB2 events in EGFR signaling	7	15	0.382305	4.90485	0.000226693	0.378125	0.00478639	0.0161106	KRAS; MAPK1; SOS1; YWHAB; MAP2K1; EGFR; PTPN11;
FRS2-mediated cascade	7	15	0.382305	4.90485	0.000226693	0.378125	0.00478639	0.0161106	KRAS; MAPK1; SOS1; YWHAB; MAP2K1; FRS2; PTPN11;
Notch receptor binds with a ligand	5	8	0.273075	6.56892	0.00034074	0.568354	0.00710443	0.023913	DLL1; JAG1; NOTCH1; NOTCH2; JAG2;
Downstream signaling of activated FGFR	16	66	0.873839	2.54724	0.000364874	0.60861	0.0075137	0.0252906	PTEN; GAB1; KRAS; MAPK1; SOS1; YWHAB; PRKACB; PRKAR1A; RICTOR; ADCY5; CAMK4; MAP2K1; PLCG1; CREB1; FRS2; PTPN11;
SHC1 events in EGFR signaling	7	16	0.382305	4.59849	0.000369944	0.617067	0.00752521	0.0253293	KRAS; MAPK1; SOS1; YWHAB; MAP2K1; EGFR; PTPN11;
Botulinum neurotoxicity	4	5	0.21846	8.40612	0.000378599	0.631503	0.00760847	0.0256095	SNAP25; STX1A; SYT1; VAMP2;
Neuronal System	33	188	1.80229	1.84397	0.000413403	0.689556	0.008209	0.0276309	RPS6KA6; DNAJC5; GRIK2; KCNA3; KCNB1; KCNH5; MAPK1; SLC38A2; SLC6A1; SNAP25; STX1A; GRIN2B; KCNA7; PRKACB; ADCY5; CACNG2; CAMK4; GABBR2; GABRB1; GNAI2; KCND3; KCNH7; KCNN3; KCNQ3; RRAS; SYT1; VAMP2; CAMK2B; CREB1; GNG2; RPS6KA1; SLC17A7; SLC38A1;
Epithelial-to-mesenchymal transition	32	185	1.74768	1.8171	0.000651795	1	0.0127905	0.0430519	AKAP2; AKT3; CALD1; CHRDL1; CLIC4; FN1; KDELC1; MAF; QKI; SDC2; SEPT6; MSN; MYLK; PLEKHO1; RUNX1T1; SOAT1; ANK2; AXL; BNC2; GAS1; KIAA1462; SERPINE1; TMEFF1; CDK14; FERMT2; NR3C1; SH2B3; SOBP; TCF4; TUBB6; VIM; ZFPM2;
TGFBR	24	125	1.31076	2.01714	0.000660107	1	0.012803	0.0430939	FOXO3; FOXO4; ROCK1; RUNX2; SDC2; TGFBR2; CTCF; RB1; CCND1; CDC25A; CDK6; E2F5; FOSB; HDAC1; LEF1; NCOA1; SMAD4; TFDP2; TGFBRAP1; TP73; CCNE1; ENG; SMURF1; SNIP1;
SHC-mediated signalling	6	13	0.32769	4.85161	0.000703111	1	0.0134803	0.0453738	KRAS; MAPK1; SOS1; YWHAB; MAP2K1; PTPN11;
ATM pathway	47	307	2.5669	1.60815	0.000757604	1	0.01436	0.0483348	HGF; PTEN; DKK1; E2F3; FBXO11; MRE11A; PPM1D; SETD8; SIRT1; USP7; YWHAB; YY1; CDC6; RB1; TYMS; TYRP1; USP1; BCL2; CCNE2; CDC25A; CES4A; CSNK1G1; E2F5; HDAC1; HSPA1B; IGFBP3; MAP4K4; MDM4; MET; SERPINE1; TFDP2; TP73; WASF1; BNIP3L; CBX5; CCND3; CCNE1; E2F2; EGFR; H2AFX; RBBP4; RRM1; SCN3B; TERF2; TP53BP2; UIMC1; ZNF385A;
Semaphorin interactions	15	64	0.819224	2.46276	0.000806504	1	0.0151151	0.0508764	PAK2; PLXNA2; CDK5R1; PLXNA4; ROCK1; SEMA3A; DPYSL4; MET; MYH9; RRAS; ARHGAP35; LIMK1; RHOC; ROCK2; SEMA6A;
Proteolytic cleavage of SNARE complex proteins	3	3	0.163845	10.5024	0.000861952	1	0.0159748	0.0537701	SNAP25; STX1A; VAMP2;
Regulation of nuclear beta catenin signaling and target gene transcription	25	135	1.36537	1.94552	0.000895032	1	0.0164056	0.0552202	CCND2; CDH1; DKK1; HNRNPA1; MED1; TCF7L2; TNIK; YWHAB; YWHAG; YWHAH; CTNNBIP1; CAMK4; CCND1; CDK6; CTDSP2; HDAC1; KLF4; LEF1; TBL1XR1; CCND3; IGF2BP1; TBL1X; TCF4; TCF7L1; ZMIZ1;
EPHB forward signaling	11	40	0.600765	2.89006	0.000968199	1	0.0175539	0.059085	KRAS; MAPK1; RAP1B; ROCK1; ITSN1; MAP2K1; MAP4K4; RRAS; SYNJ1; EFNB3; PTK2;
L1CAM interactions	17	79	0.928454	2.26105	0.0010533	1	0.0188915	0.0635872	RPS6KA6; MAPK1; NCAM1; RAP1B; ALCAM; ANK2; CNTN2; CNTNAP1; DCX; MAP2K1; RPS6KA4; SPTBN2; ANK1; DLG3; EGFR; RPS6KA1; SH3GL2;
Signaling by SCF-KIT	15	66	0.819224	2.38814	0.00113194	1	0.0200859	0.0676076	PTEN; KRAS; MAPK1; SOS1; YWHAB; CBL; RICTOR; GRAP2; KITLG; MAP2K1; CREB1; GAB2; PTPN11; SH2B3; SOCS6;
Androgen-mediated signaling	24	130	1.31076	1.93956	0.00117313	1	0.0205765	0.069259	APPBP2; DNAJA1; EGR1; HNRNPA1; MAPK1; MED1; SIRT1; CCND1; CDK6; CTDSP2; GNAI2; GNAO1; HDAC1; MAP2K1; NCOA1; POU2F1; CCND3; CREB1; GNG2; NR3C1; PTK2; SENP1; TCF4; ZMIZ1;
Signal transduction by L1	10	35	0.54615	3.00283	0.00118426	1	0.0205765	0.069259	RPS6KA6; MAPK1; NCAM1; ANK2; MAP2K1; RPS6KA4; ANK1; EGFR; RPS6KA1; SH3GL2;
Wnt signaling network	33	200	1.80229	1.73334	0.00125135	1	0.0214706	0.0722684	CCND2; CDH1; DKK1; HNRNPA1; MED1; ROCK1; TCF7L2; TNIK; WNT3; YWHAB; YWHAG; YWHAH; CHD7; CTNNBIP1; CAMK4; CCND1; CDK6; CSNK1G1; CTDSP2; DAAM1; HDAC1; KLF4; KREMEN1; LEF1; TBL1XR1; WNT1; CCND3; DVL2; IGF2BP1; TBL1X; TCF4; TCF7L1; ZMIZ1;
Frs2-mediated activation	7	19	0.382305	3.8728	0.00126146	1	0.0214706	0.0722684	KRAS; MAPK1; YWHAB; MAP2K1; PLCG1; FRS2; PTPN11;
Role of second messengers in netrin-1 signaling	5	10	0.273075	5.25645	0.00130214	1	0.0217197	0.0731067	TRPC3; DCC; PLCG1; TRPC5; TRPC7;
Rap1 signalling	5	10	0.273075	5.25645	0.00130214	1	0.0217197	0.0731067	RAP1B; YWHAB; RAP1GAP2; RAP1GAP; SIPA1;
Signalling to ERKs	9	30	0.491535	3.15317	0.00141673	1	0.0233971	0.078753	KRAS; MAPK1; SOS1; YWHAB; MAP2K1; PLCG1; RALGDS; FRS2; PTPN11;
Apoptotic execution phase	12	48	0.65538	2.62724	0.00144508	1	0.0236313	0.079541	PAK2; CDH1; ROCK1; SATB1; DCC; DBNL; HMGB1; MAPT; CASP3; PTK2; TJP1; VIM;
BMP receptor signaling	36	226	1.96614	1.67334	0.00147545	1	0.0238448	0.0802599	KPNA2; PAK2; CHRDL1; EGR1; MAF; MAPK1; PPARGC1A; RCAN1; YWHAB; YWHAG; YWHAH; PRKG1; TAOK1; XIAP; BCL2; CAMK4; CCND1; CTDSP2; CTDSPL; FOSL1; IKZF1; MAPT; POU2F1; PPM1A; RGMB; RPS6KA4; SMAD4; USF1; CAMK2B; CASP3; CREB1; DUSP16; EIF4EBP1; RCAN2; SMURF1; TCF3;
Canonical Wnt signaling pathway	27	155	1.4746	1.83001	0.00148673	1	0.0238448	0.0802599	CCND2; CDH1; DKK1; HNRNPA1; MED1; TCF7L2; TNIK; YWHAB; YWHAG; YWHAH; CTNNBIP1; CAMK4; CCND1; CDK6; CSNK1G1; CTDSP2; HDAC1; KLF4; LEF1; TBL1XR1; CCND3; DVL2; IGF2BP1; TBL1X; TCF4; TCF7L1; ZMIZ1;
Netrin mediated repulsion signals	6	15	0.32769	4.20516	0.00173495	1	0.0273009	0.0918928	RAP1B; DCC; PTK2; PTPN11; UNC5A; UNC5D;
SOS-mediated signalling	6	15	0.32769	4.20516	0.00173495	1	0.0273009	0.0918928	KRAS; MAPK1; SOS1; YWHAB; MAP2K1; PTPN11;
Prolonged ERK activation events	7	20	0.382305	3.67925	0.00178252	1	0.0275301	0.0926641	KRAS; MAPK1; YWHAB; MAP2K1; PLCG1; FRS2; PTPN11;
Effects of PIP2 hydrolysis	7	20	0.382305	3.67925	0.00178252	1	0.0275301	0.0926641	DGKH; TRPC3; DAGLA; DGKI; DGKZ; DGKE; TRPC7;
Noncanonical Wnt signaling pathway	30	182	1.63845	1.73165	0.00206117	1	0.0313034	0.105365	CCND2; CDH1; DKK1; HNRNPA1; MED1; ROCK1; TCF7L2; TNIK; YWHAB; YWHAG; YWHAH; CHD7; CTNNBIP1; CAMK4; CCND1; CDK6; CSNK1G1; CTDSP2; DAAM1; HDAC1; KLF4; LEF1; TBL1XR1; CCND3; DVL2; IGF2BP1; TBL1X; TCF4; TCF7L1; ZMIZ1;
Glypican 3 network	33	206	1.80229	1.68285	0.00206438	1	0.0313034	0.105365	CCND2; CDH1; DKK1; HNRNPA1; MED1; ROCK1; TCF7L2; TNIK; WNT3; YWHAB; YWHAG; YWHAH; CHD7; CTNNBIP1; CAMK4; CCND1; CDK6; CSNK1G1; CTDSP2; DAAM1; HDAC1; KLF4; KREMEN1; LEF1; TBL1XR1; WNT1; CCND3; DVL2; IGF2BP1; TBL1X; TCF4; TCF7L1; ZMIZ1;
RXR and RAR heterodimerization with other nuclear receptor	8	26	0.43692	3.2343	0.00216917	1	0.0323052	0.108737	MED1; THRA; BCL2; NCOA1; RARB; PPARD; RARA; THRB;
Neurotransmitter Release Cycle	8	26	0.43692	3.2343	0.00216917	1	0.0323052	0.108737	DNAJC5; SLC38A2; SLC6A1; SNAP25; STX1A; SYT1; VAMP2; SLC17A7;
RAF/MAP kinase cascade	5	11	0.273075	4.77902	0.00220066	1	0.0324841	0.109339	KRAS; MAPK1; YWHAB; MAP2K1; PTPN11;
TNF receptor signaling pathway	44	299	2.40306	1.5458	0.00241364	1	0.0351309	0.118248	ADAM17; KPNA2; PAK2; EGR1; MAF; MAPK1; PPARGC1A; RCAN1; SATB1; TNIK; YWHAB; YWHAG; YWHAH; PRKG1; RB1; RFFL; TAOK1; XIAP; BCL2; CAMK4; CASP2; CCND1; ERC1; FOSL1; IKZF1; LMNB2; MAP2K1; MAP4K4; MAPT; POU2F1; RPS6KA4; USF1; CAMK2B; CASP3; CREB1; DUSP16; EIF4EBP1; LIMK1; MAP2K7; PTK2; RCAN2; RELA; TCF3; VIM;
Signalling to RAS	7	21	0.382305	3.50413	0.00245622	1	0.0351309	0.118248	KRAS; MAPK1; SOS1; YWHAB; MAP2K1; RALGDS; PTPN11;
Signaling by Notch	7	21	0.382305	3.50413	0.00245622	1	0.0351309	0.118248	ADAM10; DLL1; JAG1; NOTCH1; NOTCH2; MAML1; JAG2;
Signaling by PDGF	16	78	0.873839	2.15541	0.00246422	1	0.0351309	0.118248	PTEN; KRAS; MAPK1; SOS1; YWHAB; PRKACB; PRKAR1A; RICTOR; ADCY5; CAMK4; MAP2K1; PDGFRA; PLCG1; CREB1; EGFR; PTPN11;
NGF signalling via TRKA from the plasma membrane	20	107	1.0923	1.96386	0.00249196	1	0.0352253	0.118566	PTEN; ADCYAP1; KRAS; MAPK1; SOS1; YWHAB; PRKACB; PRKAR1A; RICTOR; ADCY5; CAMK4; MAP2K1; PLCG1; RALGDS; ADCYAP1R1; CREB1; FRS2; PTPN11; RPS6KA1; SH3GL2;
SHC-related events	6	16	0.32769	3.9425	0.00255395	1	0.0357983	0.120494	KRAS; MAPK1; SOS1; YWHAB; MAP2K1; PTPN11;
Sema4D in semaphorin signaling	8	27	0.43692	3.11456	0.00282855	1	0.0393168	0.132337	ROCK1; MET; MYH9; RRAS; ARHGAP35; LIMK1; RHOC; ROCK2;
Apoptotic cleavage of cellular proteins	10	39	0.54615	2.69493	0.00288596	1	0.0397834	0.133908	CDH1; ROCK1; SATB1; DCC; DBNL; MAPT; CASP3; PTK2; TJP1; VIM;
Signaling events mediated by Stem cell factor receptor (c-Kit)	12	52	0.65538	2.42519	0.00299827	1	0.0409928	0.137979	PTEN; FOXO3; GAB1; SOS1; CBL; BCL2; GRAP2; KITLG; MAP2K1; SPRED1; PTPN11; SH2B3;
Phosphorylation of proteins involved in G1/S transition by active Cyclin E:Cdk2 complexes	3	4	0.163845	7.88335	0.00320196	1	0.0434217	0.146154	RB1; CCNE2; CCNE1;
Regulation of retinoblastoma protein	14	66	0.76461	2.22904	0.00324452	1	0.0436441	0.146903	CCND2; E2F3; PAX3; RUNX2; SIRT1; RB1; CCND1; CDK6; HDAC1; MET; CCND3; CCNE1; E2F2; RBBP4;
Presenilin action in Notch and Wnt signaling	11	46	0.600765	2.51318	0.003285	1	0.043835	0.147545	DKK1; MAPK1; ADAM10; APH1A; CCND1; DLL1; HDAC1; NOTCH1; WNT1; DTX1; PPARD;
GABA synthesis, release, reuptake and degradation	6	17	0.32769	3.71073	0.00363208	1	0.0467024	0.157197	DNAJC5; SLC6A1; SNAP25; STX1A; SYT1; VAMP2;
Thrombin signalling through proteinase activated receptors (PARs)	6	17	0.32769	3.71073	0.00363208	1	0.0467024	0.157197	MAPK1; F2RL2; GNAQ; IGFBP3; ARRB1; GNG2;
C-MYC pathway	25	149	1.36537	1.76274	0.00365549	1	0.0467024	0.157197	CCND2; DNMT3A; MTDH; PAK2; CLU; DKK1; E2F3; FOXO3; SHMT1; SUPT3H; ZFP36L1; BCL2; CCND1; CDC25A; FOSL1; HDAC1; LDHA; PEG10; SMAD4; TAF4B; CREB1; HMGA1; MXD4; RUVBL1; TAF10;
Trk receptor signaling mediated by the MAPK pathway	9	34	0.491535	2.78232	0.00366788	1	0.0467024	0.157197	CDK5R1; EGR1; EHD4; KRAS; MAPK1; RAP1B; MAP2K1; CREB1; RPS6KA1;
Post NMDA receptor activation events	9	34	0.491535	2.78232	0.00366788	1	0.0467024	0.157197	RPS6KA6; MAPK1; GRIN2B; PRKACB; CAMK4; RRAS; CAMK2B; CREB1; RPS6KA1;
Activation of NMDA receptor upon glutamate binding and postsynaptic events	9	34	0.491535	2.78232	0.00366788	1	0.0467024	0.157197	RPS6KA6; MAPK1; GRIN2B; PRKACB; CAMK4; RRAS; CAMK2B; CREB1; RPS6KA1;
Retinoic acid receptors-mediated signaling	11	47	0.600765	2.45972	0.00392668	1	0.0496189	0.167013	MAPK1; MED1; THRA; NCOA3; BCL2; HDAC1; NCOA1; RARB; PPARD; RARA; THRB;
Interleukin-6 signaling	4	8	0.21846	5.25776	0.00418819	1	0.0525256	0.176797	CBL; IL6ST; IL6R; PTPN11;
Downstream signal transduction	15	75	0.819224	2.1016	0.00426761	1	0.0530452	0.178546	PTEN; KRAS; MAPK1; SOS1; YWHAB; PRKACB; PRKAR1A; RICTOR; ADCY5; CAMK4; MAP2K1; PLCG1; CREB1; EGFR; PTPN11;
Fc-epsilon receptor I signaling in mast cells	13	61	0.709995	2.23957	0.00429323	1	0.0530452	0.178546	PAK2; MAPK1; SOS1; CBL; S1PR1; MAP2K1; PLCG1; GAB2; MAP2K7; PLD2; PTK2; PTPN11; RELA;
NCAM1 interactions	7	23	0.382305	3.19956	0.00437209	1	0.053231	0.179171	CACNA1C; NCAM1; CACNA1I; CACNB1; CACNB3; CNTN2; GFRA1;
BMAL1:CLOCK/NPAS2 Activates Gene Expression	7	23	0.382305	3.19956	0.00437209	1	0.053231	0.179171	CLOCK; PPARGC1A; PER2; RORA; SERPINE1; NR3C1; PER1;
Reelin signaling pathway	8	29	0.43692	2.89984	0.00460641	1	0.0556775	0.187406	CDK5R1; DAB1; CBL; GRIN2B; MAPT; RELN; MAP2K7; MAP3K11;
Regulation of Insulin Secretion	11	48	0.600765	2.40849	0.00466445	1	0.0559734	0.188402	RAP1B; SNAP25; STX1A; TCF7L2; GLP1R; PRKACB; PRKAR1A; SPCS2; VAMP2; ADRA2A; MARCKS;
Signaling events mediated by HDAC Class I	20	113	1.0923	1.8596	0.00477099	1	0.0568429	0.191329	FOXO3; FOXO4; GATAD2B; PPARGC1A; RANBP2; SIRT1; YWHAB; YY1; CAMK4; HDAC1; MTA2; GATAD2A; GNG2; HDAC4; MXD1; NR3C1; RBBP4; RELA; SIN3A; SMURF1;
Syndecan-4-mediated signaling events	32	209	1.74768	1.60845	0.00485356	1	0.0574166	0.19326	CCND2; CDH1; DKK1; FN1; HNRNPA1; MED1; ROCK1; TCF7L2; TNIK; YWHAB; YWHAG; YWHAH; CHD7; CTNNBIP1; CAMK4; CCND1; CDK6; CSNK1G1; CTDSP2; DAAM1; HDAC1; KLF4; LEF1; TBL1XR1; CCND3; DVL2; IGF2BP1; PTK2; TBL1X; TCF4; TCF7L1; ZMIZ1;
LPA receptor mediated events	18	100	0.983069	1.89129	0.00601095	1	0.0706075	0.237659	GAB1; LPAR4; ADCY5; ERC1; GNAI2; GNAO1; GNAQ; LPAR2; MAPT; PLCG1; PRKD1; CASP3; CREB1; EGFR; GNG2; PLD2; PTK2; RELA;
AndrogenReceptor	15	78	0.819224	2.02078	0.00624323	1	0.0728232	0.245117	PTEN; RUNX2; IL6ST; NCOA3; RB1; CCND1; CDC37; NCOA1; NSD1; SMAD4; BAG1; CCNE1; RELA; SENP1; SIN3A;
Integrins in angiogenesis	13	64	0.709995	2.13461	0.00657563	1	0.0761677	0.256375	EDIL3; FN1; MAPK1; ROCK1; TGFBR2; CBL; CSF1R; PIP5K1A; VCL; PTK2; PTPN11; RELA; ROCK2;
Neurofascin interactions	4	9	0.21846	4.67421	0.0069736	1	0.0780668	0.262767	ANK2; CNTNAP1; DCX; ANK1;
Regulation of KIT signaling	4	9	0.21846	4.67421	0.0069736	1	0.0780668	0.262767	CBL; KITLG; SH2B3; SOCS6;
Serotonin Neurotransmitter Release Cycle	4	9	0.21846	4.67421	0.0069736	1	0.0780668	0.262767	SNAP25; STX1A; SYT1; VAMP2;
Effects of Botulinum toxin	4	9	0.21846	4.67421	0.0069736	1	0.0780668	0.262767	SNAP25; STX1A; SYT1; VAMP2;
Dopamine Neurotransmitter Release Cycle	4	9	0.21846	4.67421	0.0069736	1	0.0780668	0.262767	SNAP25; STX1A; SYT1; VAMP2;
chondroitin sulfate biosynthesis	6	20	0.32769	3.1544	0.00887384	1	0.0986772	0.33214	CHST11; CHSY1; CSGALNACT2; B3GAT1; CHST12; XYLT1;
FGFR2c ligand binding and activation	2	2	0.10923	10.5024	0.00906157	1	0.0999856	0.336544	FGFR2; SDC2;
Nongenotropic Androgen signaling	7	26	0.382305	2.83052	0.0091114	1	0.0999856	0.336544	MAPK1; GNAI2; GNAO1; MAP2K1; CREB1; GNG2; PTK2;
Neurotransmitter Receptor Binding And Downstream Transmission In The Postsynaptic Cell	16	89	0.873839	1.88904	0.00937185	1	0.102172	0.343902	RPS6KA6; GRIK2; MAPK1; GRIN2B; PRKACB; ADCY5; CACNG2; CAMK4; GABBR2; GABRB1; GNAI2; RRAS; CAMK2B; CREB1; GNG2; RPS6KA1;
Opioid Signalling	11	53	0.600765	2.18131	0.0101435	1	0.109866	0.3698	MAPK1; PRKACB; PRKAR1A; ADCY5; CAMK4; GNAI2; GNAO1; PDE4B; PPP3R1; CREB1; GNG2;
Sema3A PAK dependent Axon repulsion	5	15	0.273075	3.50547	0.0103533	1	0.110701	0.372611	PAK2; PLXNA2; PLXNA4; SEMA3A; LIMK1;
PAR4-mediated thrombin signaling events	5	15	0.273075	3.50547	0.0103533	1	0.110701	0.372611	ROCK1; F2RL2; GNAQ; GNG2; ROCK2;
Signaling by Interleukins	16	92	0.873839	1.82745	0.0127879	1	0.135862	0.4573	KRAS; MAPK1; SOS1; YWHAB; CBL; IL6ST; PRKACB; IL6R; KITLG; MAP2K1; GAB2; PELI3; PTPN11; RELA; TMEM189-UBE2V1; UBE2V1;
Alpha6Beta4Integrin	10	48	0.54615	2.18973	0.0135497	1	0.141358	0.4758	DST; YWHAB; YWHAH; MET; TP73; CASP3; EGFR; EIF4EBP1; PTK2; VIM;
ERK activation	3	6	0.163845	5.25994	0.0138243	1	0.141358	0.4758	MAPK1; MAP2K1; PTPN11;
Interleukin-2 signaling	7	28	0.382305	2.62841	0.0138691	1	0.141358	0.4758	KRAS; MAPK1; SOS1; YWHAB; MAP2K1; GAB2; PTPN11;
IL2 signaling events mediated by STAT5	7	28	0.382305	2.62841	0.0138691	1	0.141358	0.4758	CCND2; SOS1; BCL2; CDK6; CCND3; GAB2; PTPN11;
CREB phosphorylation through the activation of Ras	7	28	0.382305	2.62841	0.0138691	1	0.141358	0.4758	RPS6KA6; MAPK1; GRIN2B; RRAS; CAMK2B; CREB1; RPS6KA1;
Signalling to p38 via RIT and RIN	5	16	0.273075	3.28651	0.0138985	1	0.141358	0.4758	KRAS; MAPK1; YWHAB; MAP2K1; PTPN11;
CRMPs in Sema3A signaling	5	16	0.273075	3.28651	0.0138985	1	0.141358	0.4758	PLXNA2; CDK5R1; PLXNA4; SEMA3A; DPYSL4;
p73 transcription factor network	14	78	0.76461	1.88615	0.0146938	1	0.148541	0.499976	FOXO3; SIRT1; PRKACB; RB1; CCNE2; CDK6; FLOT2; NEDD4L; PEA15; SERPINE1; TP73; RELA; GRAMD4; JAG2;
FoxO family signaling	10	49	0.54615	2.14505	0.0156117	1	0.154389	0.519661	FOXO3; FOXO4; G6PC; SIRT1; USP7; YWHAB; YWHAG; YWHAH; ZFAND5; CSNK1G1;
Norepinephrine Neurotransmitter Release Cycle	4	11	0.21846	3.82513	0.0156425	1	0.154389	0.519661	SNAP25; STX1A; SYT1; VAMP2;
Acetylcholine Neurotransmitter Release Cycle	4	11	0.21846	3.82513	0.0156425	1	0.154389	0.519661	SNAP25; STX1A; SYT1; VAMP2;
Caspase-mediated cleavage of cytoskeletal proteins	4	11	0.21846	3.82513	0.0156425	1	0.154389	0.519661	DBNL; MAPT; CASP3; VIM;
Signalling by NGF	22	143	1.20153	1.61638	0.0164703	1	0.161205	0.542604	ADAM17; PTEN; ADCYAP1; KRAS; MAPK1; SOS1; YWHAB; PRKACB; PRKAR1A; RICTOR; ADCY5; CAMK4; MAP2K1; PLCG1; RALGDS; ADCYAP1R1; CREB1; FRS2; PTPN11; RELA; RPS6KA1; SH3GL2;
Validated nuclear estrogen receptor alpha network	12	64	0.65538	1.97053	0.0165307	1	0.161205	0.542604	LCOR; MED1; NCOA7; NCOA3; AP1B1; CCND1; DDX17; HDAC1; NCOA1; SMAD4; HDAC4; PHB2;
VEGFR1 specific signals	7	29	0.382305	2.53781	0.0168164	1	0.161205	0.542604	HIF1A; MAPK1; CBL; PGF; PLCG1; CD2AP; PTPN11;
Sphingolipid metabolism	7	29	0.382305	2.53781	0.0168164	1	0.161205	0.542604	ACER3; CERS6; CERS4; PPM1L; PRKD1; SGPP1; VAPB;
EGFR interacts with phospholipase C-gamma	7	29	0.382305	2.53781	0.0168164	1	0.161205	0.542604	PRKACB; PRKAR1A; ADCY5; CAMK4; PLCG1; CREB1; EGFR;
Signaling events mediated by PRL	6	23	0.32769	2.74313	0.0180611	1	0.169373	0.570098	EGR1; MAPK1; PTP4A1; ROCK1; CCNE1; RHOC;
heparan sulfate biosynthesis	6	23	0.32769	2.74313	0.0180611	1	0.169373	0.570098	B3GAT1; HS2ST1; NDST1; XYLT1; EXT1; HS6ST3;
Hypoxic and oxygen homeostasis regulation of HIF-1-alpha	14	80	0.76461	1.839	0.018126	1	0.169373	0.570098	HIF1A; TCEB1; ALDOA; HK1; HNF4A; LDHA; NCOA1; PGM1; RORA; SERPINE1; SMAD4; CREB1; ENG; HIF1AN;
Zinc transporters	5	17	0.273075	3.0933	0.0181762	1	0.169373	0.570098	SLC30A5; SLC39A10; SLC39A6; SLC30A3; SLC30A1;
RNA Polymerase III Transcription Termination	5	17	0.273075	3.0933	0.0181762	1	0.169373	0.570098	POLR3H; LZTS1; NFIA; NFIB; NFIX;
Validated targets of C-MYC transcriptional activation	14	81	0.76461	1.8163	0.020055	1	0.185843	0.625533	CCND2; MTDH; E2F3; SHMT1; SUPT3H; CDC25A; FOSL1; LDHA; PEG10; SMAD4; TAF4B; HMGA1; RUVBL1; TAF10;
PLC-gamma1 signalling	7	30	0.382305	2.45324	0.0201794	1	0.185963	0.625937	PRKACB; PRKAR1A; ADCY5; CAMK4; PLCG1; CREB1; FRS2;
HIF-1-alpha transcription factor network	12	66	0.65538	1.91083	0.0207932	1	0.190567	0.641433	HIF1A; ALDOA; HK1; HNF4A; LDHA; NCOA1; PGM1; RORA; SERPINE1; SMAD4; CREB1; ENG;
CXCR3-mediated signaling events	8	37	0.43692	2.27301	0.0209797	1	0.191225	0.643649	KRAS; MAPK1; RICTOR; GNAI2; GNAO1; MAP2K1; ARRB1; GNG2;
p38 MAPK signaling pathway	27	189	1.4746	1.50082	0.021454	1	0.191429	0.644336	KPNA2; PAK2; EGR1; MAF; PPARGC1A; RCAN1; YWHAB; YWHAG; YWHAH; PRKG1; TAOK1; BCL2; CAMK4; CCND1; FOSL1; IKZF1; MAPT; POU2F1; RPS6KA4; USF1; CAMK2B; CASP3; CREB1; DUSP16; EIF4EBP1; RCAN2; TCF3;
chondroitin sulfate biosynthesis (late stages)	4	12	0.21846	3.50663	0.0217245	1	0.191429	0.644336	CHST11; CHSY1; CSGALNACT2; CHST12;
ATF-2 transcription factor network	11	59	0.600765	1.95952	0.022065	1	0.191429	0.644336	MAPK1; NF1; PPARGC1A; RB1; BCL2; CBFB; CCND1; PDGFRA; POU2F1; CREB1; HRK;
RAF phosphorylates MEK	3	7	0.163845	4.50959	0.0224941	1	0.191429	0.644336	KRAS; YWHAB; MAP2K1;
MEK activation	3	7	0.163845	4.50959	0.0224941	1	0.191429	0.644336	KRAS; YWHAB; MAP2K1;
gamma-linolenate biosynthesis II (animals)	3	7	0.163845	4.50959	0.0224941	1	0.191429	0.644336	ACSL3; ACSL1; ACSL4;
Zinc efflux and compartmentalization by the SLC30 family	3	7	0.163845	4.50959	0.0224941	1	0.191429	0.644336	SLC30A5; SLC30A3; SLC30A1;
RSK activation	3	7	0.163845	4.50959	0.0224941	1	0.191429	0.644336	RPS6KA6; MAPK1; RPS6KA1;
inositol pyrophosphates biosynthesis	3	7	0.163845	4.50959	0.0224941	1	0.191429	0.644336	IP6K1; IPMK; PPIP5K1;
NrCAM interactions	3	7	0.163845	4.50959	0.0224941	1	0.191429	0.644336	CNTN2; ANK1; DLG3;
Activation of BAD and translocation to mitochondria	3	7	0.163845	4.50959	0.0224941	1	0.191429	0.644336	YWHAB; BCL2; PPP3R1;
FGFR2b ligand binding and activation	3	7	0.163845	4.50959	0.0224941	1	0.191429	0.644336	FGFR2; SDC2; FGF10;
FGFR2 ligand binding and activation	3	7	0.163845	4.50959	0.0224941	1	0.191429	0.644336	FGFR2; SDC2; FGF10;
CXCR4-mediated signaling events	27	190	1.4746	1.49292	0.0228158	1	0.193182	0.650234	PTEN; KRAS; MAPK1; RAP1B; RCAN1; SOS1; CBL; RICTOR; DBNL; ERC1; FOSL1; GNAI2; GNAO1; GRAP2; MAP2K1; PAG1; PLCG1; POU2F1; VPS4A; GAB2; GNG2; LIMK1; PTK2; PTPN11; RCAN2; RELA; RHOC;
ARMS-mediated activation	5	18	0.273075	2.92155	0.0232384	1	0.195766	0.658933	KRAS; MAPK1; YWHAB; MAP2K1; PTPN11;
G alpha (s) signalling events	7	31	0.382305	2.37413	0.0239839	1	0.198045	0.666605	ADCY5; GNAI2; PDE3A; PDE4B; PDE7A; PDE7B; GNG2;
G1 Phase	7	31	0.382305	2.37413	0.0239839	1	0.198045	0.666605	E2F3; RB1; CCND1; CDK6; E2F5; TFDP2; E2F2;
Cyclin D associated events in G1	7	31	0.382305	2.37413	0.0239839	1	0.198045	0.666605	E2F3; RB1; CCND1; CDK6; E2F5; TFDP2; E2F2;
Vpr-mediated nuclear import of PICs	7	31	0.382305	2.37413	0.0239839	1	0.198045	0.666605	NUPL1; PSIP1; RANBP2; RAE1; SEH1L; HMGA1; NUP188;
Glucose transport	8	38	0.43692	2.21321	0.0244236	1	0.200682	0.675481	G6PC; NUPL1; RANBP2; G6PC3; HK1; RAE1; SEH1L; NUP188;
EphrinB-EPHB pathway	11	60	0.600765	1.92687	0.0247704	1	0.202534	0.681715	KRAS; MAPK1; RAP1B; ROCK1; ITSN1; MAP2K1; MAP4K4; RRAS; SYNJ1; EFNB3; PTK2;
Class IB PI3K non-lipid kinase events	2	3	0.10923	7.01323	0.0254608	1	0.205162	0.690561	MAPK1; MAP2K1;
Stimulation of the cell death response by PAK-2p34	2	3	0.10923	7.01323	0.0254608	1	0.205162	0.690561	PAK2; CASP3;
Autointegration results in viral DNA circles	2	3	0.10923	7.01323	0.0254608	1	0.205162	0.690561	PSIP1; HMGA1;
Regulation of Androgen receptor activity	17	108	0.928454	1.65398	0.026406	1	0.211756	0.712754	APPBP2; DNAJA1; EGR1; HNRNPA1; MED1; SIRT1; CCND1; CDK6; CTDSP2; HDAC1; NCOA1; POU2F1; CCND3; NR3C1; SENP1; TCF4; ZMIZ1;
Metal ion SLC transporters	6	25	0.32769	2.52377	0.026911	1	0.214773	0.72291	SLC30A5; SLC39A10; SLC11A2; SLC39A6; SLC30A3; SLC30A1;
Deadenylation-dependent mRNA decay	9	46	0.491535	2.05665	0.0274559	1	0.218079	0.734036	DCP2; EIF4A2; CNOT6; CNOT6L; DCP1A; PAN3; CNOT8; EDC3; XRN1;
PLC beta mediated events	8	39	0.43692	2.15648	0.028244	1	0.219193	0.737785	MAPK1; PRKACB; PRKAR1A; ADCY5; CAMK4; GNAI2; GNAO1; CREB1;
GAB1 signalosome	7	32	0.382305	2.29996	0.0282532	1	0.219193	0.737785	PTEN; GAB1; RICTOR; PAG1; CREB1; EGFR; PTPN11;
Netrin-mediated signaling events	7	32	0.382305	2.29996	0.0282532	1	0.219193	0.737785	MAPK1; DCC; AGAP2; MAP2K1; PLCG1; PTK2; UNC5A;
Circadian Clock	7	32	0.382305	2.29996	0.0282532	1	0.219193	0.737785	CLOCK; PPARGC1A; PER2; RORA; SERPINE1; NR3C1; PER1;
ErbB4 signaling events	7	32	0.382305	2.29996	0.0282532	1	0.219193	0.737785	ADAM17; MAPK1; EREG; GRIN2B; CBFA2T3; ERBB4; NRG2;
Signaling events regulated by Ret tyrosine kinase	12	69	0.65538	1.82776	0.0286434	1	0.221191	0.744511	GAB1; MAPK1; SOS1; DOK6; ERC1; GFRA1; RET; CREB1; FRS2; PTK2; PTPN11; RELA;
mRNA Decay by 5' to 3' Exoribonuclease	4	13	0.21846	3.2371	0.029063	1	0.222872	0.750171	DCP2; DCP1A; EDC3; XRN1;
Signaling by BMP	5	19	0.273075	2.76786	0.0291284	1	0.222872	0.750171	ACVR2A; CHRDL1; ACVR2B; GREM2; SMAD4;
KitReceptor	10	54	0.54615	1.94647	0.0295379	1	0.224973	0.757243	MAPK1; SOS1; CBL; KITLG; PLCG1; SPRED1; PTPN11; RPS6KA1; SOCS5; SOCS6;
Metabolism of vitamins and cofactors	9	47	0.491535	2.01291	0.0311879	1	0.234331	0.78874	SLC25A16; SHMT1; SLC19A2; SLC23A2; PDXK; THTPA; FPGS; GPHN; MOCS1;
TCR signaling	9	47	0.491535	2.01291	0.0311879	1	0.234331	0.78874	PAK2; PTEN; ENAH; GRAP2; PAG1; PLCG1; RELA; TMEM189-UBE2V1; UBE2V1;
Metabolism of water-soluble vitamins and cofactors	9	47	0.491535	2.01291	0.0311879	1	0.234331	0.78874	SLC25A16; SHMT1; SLC19A2; SLC23A2; PDXK; THTPA; FPGS; GPHN; MOCS1;
G-protein mediated events	8	40	0.43692	2.10258	0.0324579	1	0.241696	0.813529	MAPK1; PRKACB; PRKAR1A; ADCY5; CAMK4; GNAI2; GNAO1; CREB1;
Hexose transport	8	40	0.43692	2.10258	0.0324579	1	0.241696	0.813529	G6PC; NUPL1; RANBP2; G6PC3; HK1; RAE1; SEH1L; NUP188;
Sema4D mediated inhibition of cell attachment and migration	3	8	0.163845	3.9466	0.0334776	1	0.247083	0.831662	MET; RRAS; ARHGAP35;
Role of DCC in regulating apoptosis	3	8	0.163845	3.9466	0.0334776	1	0.247083	0.831662	DCC; CASP3; UNC5A;
Validated targets of C-MYC transcriptional repression	11	63	0.600765	1.83513	0.0343215	1	0.252195	0.848869	DNMT3A; CLU; DKK1; FOXO3; ZFP36L1; BCL2; CCND1; HDAC1; SMAD4; CREB1; MXD4;
p53 pathway	26	189	1.41999	1.44525	0.0358194	1	0.260207	0.875838	HGF; PTEN; DKK1; E2F3; FBXO11; PPM1D; SETD8; USP7; YY1; RB1; TYRP1; BCL2; CSNK1G1; HSPA1B; IGFBP3; MAP4K4; MDM4; MET; SERPINE1; TP73; BNIP3L; E2F2; EGFR; SCN3B; TP53BP2; ZNF385A;
superpathway of D-myo-inositol (1,4,5)-trisphosphate metabolism	5	20	0.273075	2.62954	0.0358799	1	0.260207	0.875838	PTEN; INPP5K; SYNJ1; IMPAD1; IPMK;
Destabilization of mRNA by Butyrate Response Factor 1 (BRF1)	5	20	0.273075	2.62954	0.0358799	1	0.260207	0.875838	DCP2; YWHAB; ZFP36L1; DCP1A; XRN1;
IL1-mediated signaling events	31	234	1.69306	1.39173	0.0373133	1	0.265034	0.892083	KPNA2; PAK2; EGR1; MAF; PPARGC1A; RCAN1; YWHAB; YWHAG; YWHAH; PRKG1; TAOK1; BCL2; CAMK4; CCND1; ERC1; FOSL1; IKZF1; MAPT; POU2F1; RPS6KA4; USF1; CAMK2B; CASP3; CREB1; DUSP16; EIF4EBP1; RCAN2; RELA; TCF3; TMEM189-UBE2V1; UBE2V1;
SEMA3A-Plexin repulsion signaling by inhibiting Integrin adhesion	4	14	0.21846	3.00604	0.0376959	1	0.265034	0.892083	PLXNA2; PLXNA4; SEMA3A; RRAS;
S1P4 pathway	4	14	0.21846	3.00604	0.0376959	1	0.265034	0.892083	MAPK1; GNAI2; GNAO1; PLCG1;
Platelet activation, signaling and aggregation	20	138	1.0923	1.52274	0.037845	1	0.265034	0.892083	DGKH; TRPC3; MAPK1; RAP1B; SOS1; BRPF3; DAGLA; DGKI; DGKZ; F2RL2; GNAI2; GNAQ; IGFBP3; VCL; ADRA2A; ARRB1; DGKE; GNG2; PTK2; TRPC7;
Phospholipase C-mediated cascade	6	27	0.32769	2.33689	0.0382339	1	0.265034	0.892083	PRKACB; PRKAR1A; ADCY5; CAMK4; PLCG1; CREB1;
Ca-dependent events	6	27	0.32769	2.33689	0.0382339	1	0.265034	0.892083	MAPK1; PRKACB; PRKAR1A; ADCY5; CAMK4; CREB1;
PI-3K cascade	6	27	0.32769	2.33689	0.0382339	1	0.265034	0.892083	PTEN; GAB1; RICTOR; CREB1; FRS2; PTPN11;
DAG and IP3 signaling	6	27	0.32769	2.33689	0.0382339	1	0.265034	0.892083	PRKACB; PRKAR1A; ADCY5; CAMK4; PLCG1; CREB1;
EPO signaling pathway	7	34	0.382305	2.16471	0.0382684	1	0.265034	0.892083	GAB1; SOS1; CBL; BCL2; PLCG1; PTPN11; SH2B3;
Interactions of Vpr with host cellular proteins	7	34	0.382305	2.16471	0.0382684	1	0.265034	0.892083	NUPL1; PSIP1; RANBP2; RAE1; SEH1L; HMGA1; NUP188;
Regulation of p38-alpha and p38-beta	23	164	1.25614	1.47345	0.0382932	1	0.265034	0.892083	KPNA2; PAK2; EGR1; MAF; PPARGC1A; RCAN1; YWHAB; YWHAG; YWHAH; PRKG1; BCL2; CAMK4; FOSL1; IKZF1; POU2F1; RPS6KA4; USF1; CASP3; CREB1; DUSP16; EIF4EBP1; RCAN2; TCF3;
E-cadherin signaling in keratinocytes	5	21	0.273075	2.50438	0.0435171	1	0.29871	1	CDH1; CTNND1; PIP5K1A; PLCG1; EGFR;
p38 signaling mediated by MAPKAP kinases	5	21	0.273075	2.50438	0.0435171	1	0.29871	1	YWHAB; YWHAG; YWHAH; CREB1; TCF3;
Signaling mediated by p38-alpha and p38-beta	9	50	0.491535	1.89216	0.04446	1	0.303931	1	PPARGC1A; YWHAB; YWHAG; YWHAH; RPS6KA4; USF1; CREB1; EIF4EBP1; TCF3;
Transport to the Golgi and subsequent modification	6	28	0.32769	2.25346	0.0448788	1	0.305542	1	MGAT4A; ST8SIA3; FUT8; LMAN1; MCFD2; PREB;
Wnt	13	82	0.709995	1.66609	0.0456956	1	0.309838	1	CDH1; DKK1; RUNX2; TCF7L2; WNT3; DAAM1; LEF1; SMAD4; WNT1; CAMK2B; DVL2; MARK2; RUVBL1;
Regulation of pyruvate dehydrogenase (PDH) complex	3	9	0.163845	3.50857	0.0467297	1	0.312143	1	PDHB; PDK3; PDK1;
Bicarbonate transporters	3	9	0.163845	3.50857	0.0467297	1	0.312143	1	SLC4A4; SLC4A5; SLC4A7;
EphrinA-EPHA pathway	8	43	0.43692	1.95592	0.0476036	1	0.312143	1	EPHA5; EPHA7; ROCK1; CBL; PLCG1; ARHGAP35; EPHA8; PTK2;
D-myo-inositol (1,3,4)-trisphosphate biosynthesis	4	15	0.21846	2.80577	0.0476387	1	0.312143	1	PTEN; INPP5K; SYNJ1; IPMK;
Vitamin B1 (thiamin) metabolism	2	4	0.10923	5.2643	0.0477197	1	0.312143	1	SLC19A2; THTPA;
Mature Notch receptor traffics to plasma membrane	2	4	0.10923	5.2643	0.0477197	1	0.312143	1	NOTCH1; NOTCH2;
Assembly of the RAD50-MRE11-NBS1 complex at DNA double-strand breaks	2	4	0.10923	5.2643	0.0477197	1	0.312143	1	MRE11A; H2AFX;
Transport of Notch receptor precursor to golgi	2	4	0.10923	5.2643	0.0477197	1	0.312143	1	NOTCH1; NOTCH2;
MRN complex relocalizes to nuclear foci	2	4	0.10923	5.2643	0.0477197	1	0.312143	1	MRE11A; H2AFX;
Integration of energy metabolism	13	83	0.709995	1.64602	0.0496558	1	0.323538	1	RAP1B; SNAP25; STX1A; TCF7L2; GLP1R; PRKACB; PRKAR1A; ADCY5; SPCS2; VAMP2; ADRA2A; GNG2; MARCKS;
ATR signaling pathway	32	250	1.74768	1.34467	0.0519609	1	0.328561	1	HGF; PTEN; DKK1; E2F3; FBXO11; MRE11A; PPM1D; SETD8; USP7; YWHAB; YY1; CDC6; RB1; TYRP1; USP1; BCL2; CDC25A; CSNK1G1; HSPA1B; IGFBP3; MAP4K4; MDM4; MET; SERPINE1; TP73; BNIP3L; E2F2; EGFR; H2AFX; SCN3B; TP53BP2; ZNF385A;
Regulatory RNA pathways	5	22	0.273075	2.3906	0.0520544	1	0.328561	1	AGO2; DICER1; AGO4; XPO5; AGO1;
Sema4D induced cell migration and growth-cone collapse	5	22	0.273075	2.3906	0.0520544	1	0.328561	1	ROCK1; MYH9; LIMK1; RHOC; ROCK2;
G alpha (z) signalling events	5	22	0.273075	2.3906	0.0520544	1	0.328561	1	RGS17; ADCY5; GNAI2; ADRA2A; GNG2;
MicroRNA (miRNA) Biogenesis	5	22	0.273075	2.3906	0.0520544	1	0.328561	1	AGO2; DICER1; AGO4; XPO5; AGO1;
Deadenylation of mRNA	5	22	0.273075	2.3906	0.0520544	1	0.328561	1	EIF4A2; CNOT6; CNOT6L; PAN3; CNOT8;
S1P3 pathway	6	29	0.32769	2.17578	0.0521995	1	0.328561	1	AKT3; MAPK1; S1PR1; GNAI2; GNAO1; GNAQ;
Interleukin-3, 5 and GM-CSF signaling	6	29	0.32769	2.17578	0.0521995	1	0.328561	1	SOS1; CBL; PRKACB; KITLG; GAB2; PTPN11;
Insulin-mediated glucose transport	6	29	0.32769	2.17578	0.0521995	1	0.328561	1	TBC1D4; YWHAB; YWHAG; YWHAH; VAMP2; LNPEP;
C-MYB transcription factor network	13	84	0.709995	1.62643	0.0538457	1	0.337649	1	KRAS; MAF; ZFHX3; BCL2; CCND1; CDK6; CSF1R; KITLG; LEF1; PAX5; TOM1; WNT1; SIN3A;
Caspase cascade in apoptosis	9	52	0.491535	1.81939	0.0551403	1	0.344472	1	SATB1; XIAP; BCL2; CASP2; LMNB2; CASP3; LIMK1; PTK2; VIM;
Regulation of Telomerase	11	68	0.600765	1.70021	0.0555363	1	0.345651	1	MAPK1; MRE11A; CCND1; HDAC1; TNKS; EGFR; MXD1; PARP2; RBBP4; SIN3A; TERF2;
Glucocorticoid receptor signaling	13	85	0.709995	1.6073	0.0582698	1	0.361106	1	CDK5R1; EGR1; MAPK1; SUV420H1; YWHAH; PRKACB; HDAC1; NCOA1; POU2F1; CREB1; GNG2; NR3C1; RELA;
Regulation of Insulin Secretion by Glucagon-like Peptide-1	4	16	0.21846	2.63052	0.0588855	1	0.361106	1	RAP1B; GLP1R; PRKACB; PRKAR1A;
heparan sulfate biosynthesis (late stages)	4	16	0.21846	2.63052	0.0588855	1	0.361106	1	HS2ST1; NDST1; EXT1; HS6ST3;
Signaling by NODAL	4	16	0.21846	2.63052	0.0588855	1	0.361106	1	ACVR2A; FOXO3; ACVR2B; SMAD4;
MAP kinase activation in TLR cascade	6	30	0.32769	2.10328	0.0602045	1	0.367843	1	MAPK1; MAP2K1; CREB1; MAP2K7; PTPN11; RPS6KA1;
Transcriptional Regulation of White Adipocyte Differentiation	11	69	0.600765	1.67558	0.0606367	1	0.369131	1	MED1; MED13; PPARGC1A; NCOA3; KLF4; NCOA1; WNT1; CCND3; CDK19; EBF1; RELA;
Signaling by Robo receptor	5	23	0.273075	2.2867	0.061497	1	0.372885	1	SRGAP1; ABL2; ENAH; ROBO1; SOS1;
Pyruvate metabolism	3	10	0.163845	3.15807	0.0621475	1	0.372885	1	PDHB; PDK3; PDK1;
Dissolution of Fibrin Clot	3	10	0.163845	3.15807	0.0621475	1	0.372885	1	IGFBP3; SERPINE1; SERPINF2;
GRB2:SOS provides linkage to MAPK signaling for Intergrins	3	10	0.163845	3.15807	0.0621475	1	0.372885	1	RAP1B; SOS1; PTK2;
Direct p53 effectors	19	138	1.03768	1.44664	0.0648	1	0.387407	1	HGF; PTEN; DKK1; E2F3; RB1; TYRP1; BCL2; HSPA1B; IGFBP3; MAP4K4; MET; SERPINE1; TP73; BNIP3L; E2F2; EGFR; SCN3B; TP53BP2; ZNF385A;
Role of Calcineurin-dependent NFAT signaling in lymphocytes	14	95	0.76461	1.54867	0.0656211	1	0.390915	1	KPNA2; EGR1; MAF; RCAN1; YWHAB; YWHAG; YWHAH; BCL2; CAMK4; FOSL1; IKZF1; POU2F1; CASP3; RCAN2;
Intrinsic Pathway for Apoptosis	6	31	0.32769	2.03545	0.0688974	1	0.406081	1	YWHAB; XIAP; BCL2; PPP3R1; CASP3; VIM;
EPHA forward signaling	6	31	0.32769	2.03545	0.0688974	1	0.406081	1	EPHA5; EPHA7; ROCK1; CBL; PLCG1; EPHA8;
Export of Viral Ribonucleoproteins from Nucleus	6	31	0.32769	2.03545	0.0688974	1	0.406081	1	NUPL1; RANBP2; HSPA1B; RAE1; SEH1L; NUP188;
dermatan sulfate biosynthesis	4	17	0.21846	2.47588	0.0714114	1	0.414636	1	CHSY1; CSGALNACT2; B3GAT1; XYLT1;
Destabilization of mRNA by Tristetraprolin (TTP)	4	17	0.21846	2.47588	0.0714114	1	0.414636	1	DCP2; YWHAB; DCP1A; XRN1;
Negative regulation of FGFR signaling	4	17	0.21846	2.47588	0.0714114	1	0.414636	1	CBL; EGFR; FRS2; PTPN11;
Purine metabolism	5	24	0.273075	2.19146	0.0718409	1	0.414636	1	GMPS; NT5C1B; NT5C1B-RDH14; DCK; ADK;
Voltage gated Potassium channels	7	39	0.382305	1.88726	0.0725801	1	0.414636	1	KCNA3; KCNB1; KCNH5; KCNA7; KCND3; KCNH7; KCNQ3;
Mitotic G1-G1/S phases	19	140	1.03768	1.42597	0.0726791	1	0.414636	1	DYRK1A; E2F3; LIN54; PSMF1; CDC6; RB1; TYMS; CCND1; CCNE2; CDC25A; CDK6; E2F5; HDAC1; TFDP2; CCNE1; E2F2; LIN52; RBBP4; WEE1;
Maturation of Notch precursor via proteolytic cleavage	2	5	0.10923	4.21354	0.0745748	1	0.414636	1	NOTCH1; NOTCH2;
RAF activation	2	5	0.10923	4.21354	0.0745748	1	0.414636	1	KRAS; YWHAB;
CREB phosphorylation through the activation of Adenylate Cyclase	2	5	0.10923	4.21354	0.0745748	1	0.414636	1	PRKACB; CREB1;
SMAC-mediated dissociation of IAP:caspase complexes	2	5	0.10923	4.21354	0.0745748	1	0.414636	1	XIAP; CASP3;
SMAC-mediated apoptotic response	2	5	0.10923	4.21354	0.0745748	1	0.414636	1	XIAP; CASP3;
Activation of CaMK IV	2	5	0.10923	4.21354	0.0745748	1	0.414636	1	CAMK4; CREB1;
SMAC binds to IAPs	2	5	0.10923	4.21354	0.0745748	1	0.414636	1	XIAP; CASP3;
NGF-independant TRKA activation	2	5	0.10923	4.21354	0.0745748	1	0.414636	1	ADCYAP1; ADCYAP1R1;
CaMK IV-mediated phosphorylation of CREB	2	5	0.10923	4.21354	0.0745748	1	0.414636	1	CAMK4; CREB1;
APOBEC3G mediated resistance to HIV-1 infection	2	5	0.10923	4.21354	0.0745748	1	0.414636	1	PSIP1; HMGA1;
folate polyglutamylation	2	5	0.10923	4.21354	0.0745748	1	0.414636	1	SHMT1; FPGS;
Glucocorticoid receptor regulatory network	12	80	0.65538	1.57648	0.0754568	1	0.418146	1	CDK5R1; EGR1; MAPK1; SUV420H1; YWHAH; PRKACB; HDAC1; NCOA1; POU2F1; CREB1; NR3C1; RELA;
Recycling pathway of L1	6	32	0.32769	1.97187	0.0782768	1	0.432337	1	RPS6KA6; MAPK1; RAP1B; RPS6KA4; RPS6KA1; SH3GL2;
NICD traffics to nucleus	3	11	0.163845	2.87123	0.0795869	1	0.435249	1	NOTCH1; NOTCH2; MAML1;
Notch-HLH transcription pathway	3	11	0.163845	2.87123	0.0795869	1	0.435249	1	NOTCH1; NOTCH2; MAML1;
CDC6 association with the ORC:origin complex	3	11	0.163845	2.87123	0.0795869	1	0.435249	1	E2F3; CDC6; E2F2;
TCR signaling in na&#xef;ve CD4+ T cells	18	133	0.983069	1.42206	0.0806524	1	0.439635	1	PTEN; KRAS; MAPK1; RCAN1; SOS1; CBL; DBNL; ERC1; FOSL1; GRAP2; MAP2K1; PAG1; PLCG1; POU2F1; GAB2; PTPN11; RCAN2; RELA;
Hedgehog signaling events mediated by Gli proteins	8	48	0.43692	1.75222	0.0817716	1	0.444283	1	CSNK1G1; GNAI2; GNAO1; HDAC1; MAP2K1; GNG2; RBBP4; SIN3A;
CaM pathway	5	25	0.273075	2.10384	0.0830733	1	0.446988	1	PRKACB; PRKAR1A; ADCY5; CAMK4; CREB1;
Calmodulin induced events	5	25	0.273075	2.10384	0.0830733	1	0.446988	1	PRKACB; PRKAR1A; ADCY5; CAMK4; CREB1;
VEGFR3 signaling in lymphatic endothelium	5	25	0.273075	2.10384	0.0830733	1	0.446988	1	FN1; MAPK1; SOS1; CREB1; RPS6KA1;
DARPP-32 events	4	18	0.21846	2.3384	0.0851751	1	0.456823	1	PRKACB; PRKAR1A; PDE4B; PPP3R1;
Signaling events mediated by the Hedgehog family	10	65	0.54615	1.61712	0.0865589	1	0.461279	1	CDON; CSNK1G1; GAS1; GNAI2; GNAO1; HDAC1; MAP2K1; GNG2; RBBP4; SIN3A;
Toll Like Receptor 9 (TLR9) Cascade	10	65	0.54615	1.61712	0.0865589	1	0.461279	1	EEA1; MAPK1; MAP2K1; CREB1; MAP2K7; PTPN11; RELA; RPS6KA1; TMEM189-UBE2V1; UBE2V1;
L-cysteine degradation II	1	1	0.054615	10.5024	0.0952158	1	0.499434	1	CTH;
adenine and adenosine salvage VI	1	1	0.054615	10.5024	0.0952158	1	0.499434	1	ADK;
BoNT Light Chain Types A, C1, E cleave SNAP-25	1	1	0.054615	10.5024	0.0952158	1	0.499434	1	SNAP25;
BoNT Light Chain Types B, D, and F cleave VAMP/Synaptobrevin	1	1	0.054615	10.5024	0.0952158	1	0.499434	1	VAMP2;
Nuclear Receptor transcription pathway	1	1	0.054615	10.5024	0.0952158	1	0.499434	1	MED1;
SLC-mediated transmembrane transport	30	247	1.63845	1.27597	0.0988037	1	0.506874	1	SLC24A4; SLC4A4; G6PC; NUPL1; RANBP2; SLC30A5; SLC38A2; SLC39A10; SLC4A5; SLC6A1; SLC11A2; SLC39A6; G6PC3; HK1; RAE1; SEH1L; SLC12A2; SLC27A4; SLC30A3; SLC44A2; SLC4A7; SLC7A2; SLC7A6; SLC8A1; SLCO3A1; NUP188; SLC17A7; SLC20A1; SLC30A1; SLC38A1;
stearate biosynthesis I (animals)	3	12	0.163845	2.63216	0.0988744	1	0.506874	1	ACSL3; ACSL1; ACSL4;
Interaction between L1 and Ankyrins	3	12	0.163845	2.63216	0.0988744	1	0.506874	1	ANK2; SPTBN2; ANK1;
Apoptotic cleavage of cell adhesion proteins	3	12	0.163845	2.63216	0.0988744	1	0.506874	1	CDH1; CASP3; TJP1;
N-glycan antennae elongation in the medial/trans-Golgi	3	12	0.163845	2.63216	0.0988744	1	0.506874	1	MGAT4A; ST8SIA3; FUT8;
RNA Polymerase III Transcription	6	34	0.32769	1.85591	0.0990653	1	0.506874	1	POLR3H; POU2F1; LZTS1; NFIA; NFIB; NFIX;
RNA Polymerase III Abortive And Retractive Initiation	6	34	0.32769	1.85591	0.0990653	1	0.506874	1	POLR3H; POU2F1; LZTS1; NFIA; NFIB; NFIX;
IL8- and CXCR2-mediated signaling events	6	34	0.32769	1.85591	0.0990653	1	0.506874	1	CBL; GNAI2; ARRB1; GNG2; PLD2; RAB11A;
Ras signaling in the CD4+ TCR pathway	7	42	0.382305	1.75248	0.0997572	1	0.507604	1	KRAS; MAPK1; RCAN1; FOSL1; MAP2K1; POU2F1; RCAN2;
3-phosphoinositide degradation	4	19	0.21846	2.21539	0.100121	1	0.507604	1	PTEN; INPP5K; SYNJ1; TMEM55A;
Generation of second messenger molecules	4	19	0.21846	2.21539	0.100121	1	0.507604	1	PAK2; ENAH; GRAP2; PLCG1;
TRAF6 mediated induction of NFkB and MAP kinases upon TLR7/8 or 9 activation	9	59	0.491535	1.60357	0.104789	1	0.513363	1	MAPK1; MAP2K1; CREB1; MAP2K7; PTPN11; RELA; RPS6KA1; TMEM189-UBE2V1; UBE2V1;
MyD88 cascade initiated on plasma membrane	9	59	0.491535	1.60357	0.104789	1	0.513363	1	MAPK1; MAP2K1; CREB1; MAP2K7; PTPN11; RELA; RPS6KA1; TMEM189-UBE2V1; UBE2V1;
Molybdenum cofactor biosynthesis	2	6	0.10923	3.51245	0.10495	1	0.513363	1	GPHN; MOCS1;
SHC-mediated cascade	2	6	0.10923	3.51245	0.10495	1	0.513363	1	KRAS; SOS1;
ADP signalling through P2Y purinoceptor 12	2	6	0.10923	3.51245	0.10495	1	0.513363	1	GNAI2; GNG2;
acetyl-CoA biosynthesis (from pyruvate)	2	6	0.10923	3.51245	0.10495	1	0.513363	1	DBT; PDHB;
fatty acid activation	2	6	0.10923	3.51245	0.10495	1	0.513363	1	ACSL1; ACSL4;
Activation of TRKA receptors	2	6	0.10923	3.51245	0.10495	1	0.513363	1	ADCYAP1; ADCYAP1R1;
CREB phosphorylation through the activation of CaMKK	2	6	0.10923	3.51245	0.10495	1	0.513363	1	CAMK4; CREB1;
chondroitin and dermatan biosynthesis	2	6	0.10923	3.51245	0.10495	1	0.513363	1	CHSY1; CSGALNACT2;
Elevation of cytosolic Ca2+ levels	2	6	0.10923	3.51245	0.10495	1	0.513363	1	TRPC3; TRPC7;
FGFR1b ligand binding and activation	2	6	0.10923	3.51245	0.10495	1	0.513363	1	SDC2; FGF10;
EGFR1	18	138	0.983069	1.37054	0.105478	1	0.514436	1	GAB1; KRAS; MAPK1; SOS1; YWHAB; CBL; PRKAR1A; CTNND1; MAP2K1; MTA2; PRKD1; SHOC2; CREB1; EGFR; KLF11; PLD2; PTPN11; RPS6KA1;
IRS-mediated signalling	8	51	0.43692	1.64917	0.107781	1	0.524136	1	KRAS; MAPK1; SOS1; YWHAB; MAP2K1; PPM1A; EIF4EBP1; PTPN11;
Adherens junctions interactions	5	27	0.273075	1.94806	0.108115	1	0.524231	1	CDH1; CDH4; CTNND1; PVRL1; CADM1;
HIV Life Cycle	14	103	0.76461	1.42839	0.110251	1	0.530915	1	ELL; NUPL1; PSIP1; RANBP2; TCEB1; CCNT2; TCEB3; RAE1; SEH1L; TAF4B; TAF5; HMGA1; NUP188; TAF10;
a6b1 and a6b4 Integrin signaling	6	35	0.32769	1.8029	0.110448	1	0.530915	1	CDH1; YWHAB; YWHAG; YWHAH; MET; EGFR;
Generic Transcription Pathway	6	35	0.32769	1.8029	0.110448	1	0.530915	1	MED1; MED13; ZNF45; NOTCH1; NOTCH2; MAML1;
Asparagine N-linked glycosylation	11	77	0.600765	1.50151	0.112354	1	0.538523	1	MGAT4A; ST8SIA3; STT3A; ALG6; FUT8; LMAN1; MCFD2; MLEC; PREB; GMPPB; MOGS;
MyD88 dependent cascade initiated on endosome	9	60	0.491535	1.57685	0.113451	1	0.539136	1	MAPK1; MAP2K1; CREB1; MAP2K7; PTPN11; RELA; RPS6KA1; TMEM189-UBE2V1; UBE2V1;
Toll Like Receptor 10 (TLR10) Cascade	9	60	0.491535	1.57685	0.113451	1	0.539136	1	MAPK1; MAP2K1; CREB1; MAP2K7; PTPN11; RELA; RPS6KA1; TMEM189-UBE2V1; UBE2V1;
Toll Like Receptor 5 (TLR5) Cascade	9	60	0.491535	1.57685	0.113451	1	0.539136	1	MAPK1; MAP2K1; CREB1; MAP2K7; PTPN11; RELA; RPS6KA1; TMEM189-UBE2V1; UBE2V1;
PKA-mediated phosphorylation of CREB	4	20	0.21846	2.10468	0.116181	1	0.55054	1	PRKACB; PRKAR1A; ADCY5; CREB1;
D-myo-inositol (1,4,5)-trisphosphate degradation	3	13	0.163845	2.42984	0.119818	1	0.564565	1	INPP5K; SYNJ1; IMPAD1;
G-protein activation	3	13	0.163845	2.42984	0.119818	1	0.564565	1	GNAI2; GNAO1; GNG2;
E2F mediated regulation of DNA replication	5	28	0.273075	1.87851	0.121862	1	0.572579	1	CDC6; RB1; TYMS; CDC25A; CCNE1;
Transmembrane transport of small molecules	43	378	2.34844	1.19496	0.125937	1	0.590066	1	SLC24A4; SLC4A4; ABCC1; ATP1B1; ATP6V1A; ATP8A1; G6PC; NUPL1; RANBP2; SLC30A5; SLC38A2; SLC39A10; SLC4A5; SLC6A1; ATP6V1C2; PRKACB; PRKAR1A; SLC11A2; SLC39A6; ADCY5; ATP1A2; FXYD2; G6PC3; GABRB1; GLRA3; HK1; RAE1; SEH1L; SLC12A2; SLC27A4; SLC30A3; SLC44A2; SLC4A7; SLC7A2; SLC7A6; SLC8A1; SLCO3A1; ATP11C; NUP188; SLC17A7; SLC20A1; SLC30A1; SLC38A1;
IRS-related events	8	53	0.43692	1.58695	0.12736	1	0.595062	1	KRAS; MAPK1; SOS1; YWHAB; MAP2K1; PPM1A; EIF4EBP1; PTPN11;
Toll Like Receptor 7/8 (TLR7/8) Cascade	9	62	0.491535	1.52599	0.131917	1	0.61292	1	MAPK1; MAP2K1; CREB1; MAP2K7; PTPN11; RELA; RPS6KA1; TMEM189-UBE2V1; UBE2V1;
MyD88:Mal cascade initiated on plasma membrane	9	62	0.491535	1.52599	0.131917	1	0.61292	1	MAPK1; MAP2K1; CREB1; MAP2K7; PTPN11; RELA; RPS6KA1; TMEM189-UBE2V1; UBE2V1;
G alpha (12/13) signalling events	4	21	0.21846	2.0045	0.133279	1	0.615164	1	ROCK1; GNG2; RHOC; ROCK2;
Regulation of Glucokinase by Glucokinase Regulatory Protein	5	29	0.273075	1.81376	0.136375	1	0.615164	1	NUPL1; RANBP2; RAE1; SEH1L; NUP188;
Transport of Ribonucleoproteins into the Host Nucleus	5	29	0.273075	1.81376	0.136375	1	0.615164	1	NUPL1; RANBP2; RAE1; SEH1L; NUP188;
Ion transport by P-type ATPases	5	29	0.273075	1.81376	0.136375	1	0.615164	1	ATP1B1; ATP8A1; ATP1A2; FXYD2; ATP11C;
NEP/NS2 Interacts with the Cellular Export Machinery	5	29	0.273075	1.81376	0.136375	1	0.615164	1	NUPL1; RANBP2; RAE1; SEH1L; NUP188;
Interleukin receptor SHC signaling	2	7	0.10923	3.01139	0.137932	1	0.615164	1	SOS1; GAB2;
Apoptotic factor-mediated response	2	7	0.10923	3.01139	0.137932	1	0.615164	1	XIAP; CASP3;
FGFR1 ligand binding and activation	2	7	0.10923	3.01139	0.137932	1	0.615164	1	SDC2; FGF10;
Purine salvage	2	7	0.10923	3.01139	0.137932	1	0.615164	1	DCK; ADK;
CREB phosphorylation	2	7	0.10923	3.01139	0.137932	1	0.615164	1	CREB1; RPS6KA1;
glycoaminoglycan-protein linkage region biosynthesis	2	7	0.10923	3.01139	0.137932	1	0.615164	1	B3GAT1; XYLT1;
Pyrimidine salvage reactions	2	7	0.10923	3.01139	0.137932	1	0.615164	1	DCK; UCK2;
2-LTR circle formation	2	7	0.10923	3.01139	0.137932	1	0.615164	1	PSIP1; HMGA1;
Nectin/Necl trans heterodimerization	2	7	0.10923	3.01139	0.137932	1	0.615164	1	PVRL1; CADM1;
PECAM1 interactions	2	7	0.10923	3.01139	0.137932	1	0.615164	1	PLCG1; PTPN11;
ID	3	14	0.163845	2.25641	0.142215	1	0.625895	1	RB1; ID3; TCF3;
Synthesis of very long-chain fatty acyl-CoAs	3	14	0.163845	2.25641	0.142215	1	0.625895	1	ACSL3; ACSL1; ACSL4;
guanosine nucleotides de novo biosynthesis	3	14	0.163845	2.25641	0.142215	1	0.625895	1	GMPS; NME6; RRM1;
pyrimidine deoxyribonucleotides de novo biosynthesis	3	14	0.163845	2.25641	0.142215	1	0.625895	1	NME6; TYMS; RRM1;
FGFR ligand binding and activation	3	14	0.163845	2.25641	0.142215	1	0.625895	1	FGFR2; SDC2; FGF10;
Ion channel transport	7	46	0.382305	1.60013	0.143407	1	0.62948	1	ATP1B1; ATP8A1; ATP1A2; FXYD2; GABRB1; GLRA3; ATP11C;
IL8-mediated signaling events	6	38	0.32769	1.6606	0.148307	1	0.645893	1	CBL; GNAI2; ARRB1; GNG2; PLD2; RAB11A;
Signaling events mediated by HDAC Class II	6	38	0.32769	1.6606	0.148307	1	0.645893	1	RANBP2; YWHAB; CAMK4; GNG2; HDAC4; NR3C1;
ErbB2/ErbB3 signaling events	6	38	0.32769	1.6606	0.148307	1	0.645893	1	KRAS; MAPK1; SOS1; MAP2K1; NRG2; PTPN11;
Nuclear import of Rev protein	5	30	0.273075	1.75332	0.151609	1	0.654496	1	NUPL1; RANBP2; RAE1; SEH1L; NUP188;
Toll Like Receptor TLR6:TLR2 Cascade	9	64	0.491535	1.47831	0.151852	1	0.654496	1	MAPK1; MAP2K1; CREB1; MAP2K7; PTPN11; RELA; RPS6KA1; TMEM189-UBE2V1; UBE2V1;
Validated transcriptional targets of deltaNp63 isoforms	9	64	0.491535	1.47831	0.151852	1	0.654496	1	MRE11A; RUNX1; COL5A1; AXL; IGFBP3; NOTCH1; DVL2; FOSL2; TCF7L1;
Toll Like Receptor TLR1:TLR2 Cascade	9	64	0.491535	1.47831	0.151852	1	0.654496	1	MAPK1; MAP2K1; CREB1; MAP2K7; PTPN11; RELA; RPS6KA1; TMEM189-UBE2V1; UBE2V1;
Class B/2 (Secretin family receptors)	7	47	0.382305	1.56609	0.155549	1	0.668702	1	ADCYAP1; WNT3; GLP1R; CALCR; CRHR1; WNT1; ADCYAP1R1;
Insulin receptor signalling cascade	8	56	0.43692	1.50195	0.159896	1	0.679172	1	KRAS; MAPK1; SOS1; YWHAB; MAP2K1; PPM1A; EIF4EBP1; PTPN11;
Toll Like Receptor 2 (TLR2) Cascade	9	65	0.491535	1.45557	0.162346	1	0.679172	1	MAPK1; MAP2K1; CREB1; MAP2K7; PTPN11; RELA; RPS6KA1; TMEM189-UBE2V1; UBE2V1;
Late Phase of HIV Life Cycle	12	92	0.65538	1.37087	0.163326	1	0.679172	1	ELL; NUPL1; RANBP2; TCEB1; CCNT2; TCEB3; RAE1; SEH1L; TAF4B; TAF5; NUP188; TAF10;
Signaling events mediated by TCPTP	12	92	0.65538	1.37087	0.163326	1	0.679172	1	HGF; KPNA2; GAB1; RAB4A; SOS1; CBL; CSF1R; LMAN1; MET; EGFR; HMGA1; SOCS5;
CREB phosphorylation through the activation of CaMKII	3	15	0.163845	2.10608	0.165859	1	0.679172	1	GRIN2B; CAMK2B; CREB1;
Lysosome Vesicle Biogenesis	3	15	0.163845	2.10608	0.165859	1	0.679172	1	AP1B1; ARRB1; SH3GL2;
Nuclear Events (kinase and transcription factor activation)	3	15	0.163845	2.10608	0.165859	1	0.679172	1	MAPK1; CREB1; RPS6KA1;
Association of licensing factors with the pre-replicative complex	3	15	0.163845	2.10608	0.165859	1	0.679172	1	E2F3; CDC6; E2F2;
G1/S-Specific Transcription	3	15	0.163845	2.10608	0.165859	1	0.679172	1	CDC6; TYMS; CCNE1;
1D-myo-inositol hexakisphosphate biosynthesis II (mammalian)	3	15	0.163845	2.10608	0.165859	1	0.679172	1	INPP5K; SYNJ1; IPMK;
Sumoylation by RanBP2 regulates transcriptional repression	3	15	0.163845	2.10608	0.165859	1	0.679172	1	RANBP2; HDAC1; HDAC4;
Lissencephaly gene (LIS1) in neuronal migration and development	5	31	0.273075	1.69678	0.167515	1	0.679172	1	CDK5R1; DAB1; DCX; RELN; CLIP1;
Pyruvate metabolism and Citric Acid (TCA) cycle	5	31	0.273075	1.69678	0.167515	1	0.679172	1	PDHB; PDK3; SDHC; DLST; PDK1;
Apoptosis	19	158	1.03768	1.26353	0.172023	1	0.679172	1	PAK2; CDH1; PSMF1; ROCK1; SATB1; YWHAB; DCC; XIAP; BCL2; CCND1; DBNL; HMGB1; MAPT; PPP3R1; CASP3; PTK2; TJP1; UNC5A; VIM;
Recruitment of repair and signaling proteins to double-strand breaks	2	8	0.10923	2.63544	0.172751	1	0.679172	1	MRE11A; H2AFX;
Inactivation of Cdc42 and Rac	2	8	0.10923	2.63544	0.172751	1	0.679172	1	SRGAP1; ROBO1;
S1P5 pathway	2	8	0.10923	2.63544	0.172751	1	0.679172	1	GNAI2; GNAO1;
Apoptosis induced DNA fragmentation	2	8	0.10923	2.63544	0.172751	1	0.679172	1	HMGB1; CASP3;
Activation of DNA fragmentation factor	2	8	0.10923	2.63544	0.172751	1	0.679172	1	HMGB1; CASP3;
A third proteolytic cleavage releases NICD	2	8	0.10923	2.63544	0.172751	1	0.679172	1	NOTCH1; NOTCH2;
cysteine biosynthesis III (mammalia)	2	8	0.10923	2.63544	0.172751	1	0.679172	1	CTH; AHCYL2;
Rho GTPase cycle	2	8	0.10923	2.63544	0.172751	1	0.679172	1	GDI2; RHOC;
Signaling by Rho GTPases	2	8	0.10923	2.63544	0.172751	1	0.679172	1	GDI2; RHOC;
Activation of Rac	2	8	0.10923	2.63544	0.172751	1	0.679172	1	ROBO1; SOS1;
Activation of Kainate Receptors upon glutamate binding	2	8	0.10923	2.63544	0.172751	1	0.679172	1	GRIK2; GNG2;
TRAF6 mediated IRF7 activation in TLR7/8 or 9 signaling	2	8	0.10923	2.63544	0.172751	1	0.679172	1	TMEM189-UBE2V1; UBE2V1;
Thromboxane signalling through TP receptor	2	8	0.10923	2.63544	0.172751	1	0.679172	1	GNAQ; GNG2;
Metabolism of folate and pterines	2	8	0.10923	2.63544	0.172751	1	0.679172	1	SHMT1; FPGS;
Integration of provirus	2	8	0.10923	2.63544	0.172751	1	0.679172	1	PSIP1; HMGA1;
Lysosphingolipid and LPA receptors	2	8	0.10923	2.63544	0.172751	1	0.679172	1	S1PR1; LPAR2;
FAS (CD95) signaling pathway	16	130	0.873839	1.29331	0.17291	1	0.679172	1	MAPK1; SATB1; RB1; XIAP; BCL2; CASP2; ERC1; LMNB2; MAP2K1; MAP4K4; CASP3; LIMK1; MAP2K7; PTK2; RELA; VIM;
pyridoxal 5'-phosphate salvage pathway	1	2	0.054615	5.27733	0.18137	1	0.679172	1	PDXK;
spermine biosynthesis	1	2	0.054615	5.27733	0.18137	1	0.679172	1	AMD1;
spermidine biosynthesis	1	2	0.054615	5.27733	0.18137	1	0.679172	1	AMD1;
dolichol and dolichyl phosphate biosynthesis	1	2	0.054615	5.27733	0.18137	1	0.679172	1	DHDDS;
Activation of Na-permeable Kainate Receptors	1	2	0.054615	5.27733	0.18137	1	0.679172	1	GRIK2;
Regulation of PAK-2p34 activity by PS-GAP/RHG10	1	2	0.054615	5.27733	0.18137	1	0.679172	1	PAK2;
cysteine biosynthesis/homocysteine degradation	1	2	0.054615	5.27733	0.18137	1	0.679172	1	CTH;
glycine biosynthesis I	1	2	0.054615	5.27733	0.18137	1	0.679172	1	SHMT1;
phospho-PLA2 pathway	1	2	0.054615	5.27733	0.18137	1	0.679172	1	MAPK1;
FGFR3 ligand binding and activation	1	2	0.054615	5.27733	0.18137	1	0.679172	1	SDC2;
FGFR4 ligand binding and activation	1	2	0.054615	5.27733	0.18137	1	0.679172	1	SDC2;
FGFR3c ligand binding and activation	1	2	0.054615	5.27733	0.18137	1	0.679172	1	SDC2;
Inhibition of Insulin Secretion by Adrenaline/Noradrenaline	1	2	0.054615	5.27733	0.18137	1	0.679172	1	ADRA2A;
FGFR1c ligand binding and activation	1	2	0.054615	5.27733	0.18137	1	0.679172	1	SDC2;
Vitamins B6 activation to pyridoxal phosphate	1	2	0.054615	5.27733	0.18137	1	0.679172	1	PDXK;
Polyamines are oxidized to amines, aldehydes and H2O2 by PAOs	1	2	0.054615	5.27733	0.18137	1	0.679172	1	PAOX;
Viral RNP Complexes in the Host Cell Nucleus	1	2	0.054615	5.27733	0.18137	1	0.679172	1	HSPA1B;
ERK2 activation	1	2	0.054615	5.27733	0.18137	1	0.679172	1	MAPK1;
FGFR3b ligand binding and activation	1	2	0.054615	5.27733	0.18137	1	0.679172	1	SDC2;
Ionotropic activity of Kainate Receptors	1	2	0.054615	5.27733	0.18137	1	0.679172	1	GRIK2;
DNA Damage Recognition in GG-NER	1	2	0.054615	5.27733	0.18137	1	0.679172	1	RAD23B;
Astrocytic Glutamate-Glutamine Uptake And Metabolism	1	2	0.054615	5.27733	0.18137	1	0.679172	1	SLC38A1;
Reactions specific to the complex N-glycan synthesis pathway	1	2	0.054615	5.27733	0.18137	1	0.679172	1	FUT8;
Translocation of BoNT Light chain	1	2	0.054615	5.27733	0.18137	1	0.679172	1	SYT1;
Neurotransmitter uptake and Metabolism In Glial Cells	1	2	0.054615	5.27733	0.18137	1	0.679172	1	SLC38A1;
D-myo-inositol (3,4,5,6)-tetrakisphosphate biosynthesis	1	2	0.054615	5.27733	0.18137	1	0.679172	1	IPMK;
Transport of inorganic cations/anions and amino acids/oligopeptides	12	94	0.65538	1.34171	0.181601	1	0.679172	1	SLC24A4; SLC4A4; SLC38A2; SLC4A5; SLC12A2; SLC4A7; SLC7A2; SLC7A6; SLC8A1; SLC17A7; SLC20A1; SLC38A1;
Metabolism of nucleotides	8	58	0.43692	1.45017	0.183533	1	0.682283	1	GMPS; NT5C1B; NT5C1B-RDH14; DCK; TYMS; ADK; UCK2; RRM1;
Rev-mediated nuclear export of HIV-1 RNA	5	32	0.273075	1.64377	0.18404	1	0.682283	1	NUPL1; RANBP2; RAE1; SEH1L; NUP188;
Transport of the SLBP independent Mature mRNA	5	32	0.273075	1.64377	0.18404	1	0.682283	1	NUPL1; RANBP2; RAE1; SEH1L; NUP188;
Potassium Channels	10	76	0.54615	1.3831	0.184069	1	0.682283	1	KCNA3; KCNB1; KCNH5; KCNA7; GABBR2; KCND3; KCNH7; KCNN3; KCNQ3; GNG2;
Circadian rhythm pathway	3	16	0.163845	1.97453	0.190545	1	0.693949	1	CLOCK; PER2; PER1;
Other semaphorin interactions	3	16	0.163845	1.97453	0.190545	1	0.693949	1	PLXNA2; PLXNA4; SEMA6A;
Glucagon-type ligand receptors	3	16	0.163845	1.97453	0.190545	1	0.693949	1	ADCYAP1; GLP1R; ADCYAP1R1;
Spry regulation of FGF signaling	3	16	0.163845	1.97453	0.190545	1	0.693949	1	CBL; EGFR; PTPN11;
Platelet calcium homeostasis	3	16	0.163845	1.97453	0.190545	1	0.693949	1	TRPC3; SLC8A1; TRPC7;
Hedgehog	3	16	0.163845	1.97453	0.190545	1	0.693949	1	DYRK1A; GAS1; SIN3A;
Signal amplification	3	16	0.163845	1.97453	0.190545	1	0.693949	1	GNAI2; GNAQ; GNG2;
LPA4-mediated signaling events	3	16	0.163845	1.97453	0.190545	1	0.693949	1	LPAR4; ADCY5; CREB1;
TRAF6 Mediated Induction of proinflammatory cytokines	7	50	0.382305	1.47214	0.194605	1	0.705656	1	MAPK1; MAP2K1; CREB1; MAP2K7; PTPN11; RELA; RPS6KA1;
Angiopoietin receptor Tie2-mediated signaling	7	50	0.382305	1.47214	0.194605	1	0.705656	1	FN1; MAPK1; ELF2; PLD2; PTK2; PTPN11; RELA;
Hemostasis	41	375	2.23921	1.14851	0.195316	1	0.706696	1	DGKH; PHF21A; TRPC3; FN1; JMJD1C; KIF2A; KRAS; MAPK1; RAP1B; SOS1; H3F3B; PRKACB; PRKAR1A; BRPF3; CD47; DAGLA; DGKI; DGKZ; F2RL2; GNAI2; GNAQ; HDAC1; IGFBP3; KLC2; PLCG1; SERPINE1; SERPINF2; SLC8A1; VCL; ADRA2A; ARRB1; CBX5; DGKE; GNG2; PTK2; PTPN11; SH2B3; SIN3A; TRPC7; WEE1; ZFPM2;
p63 transcription factor network	13	105	0.709995	1.30117	0.197926	1	0.714589	1	DST; MRE11A; RUNX1; COL5A1; DICER1; AXL; FLOT2; IGFBP3; JAG1; NOTCH1; DVL2; FOSL2; TCF7L1;
Alpha4 beta1 integrin signaling events	5	33	0.273075	1.59397	0.20113	1	0.721475	1	FN1; PRKACB; PRKAR1A; GIT1; PTK2;
Interactions of Rev with host cellular proteins	5	33	0.273075	1.59397	0.20113	1	0.721475	1	NUPL1; RANBP2; RAE1; SEH1L; NUP188;
Transport of the SLBP Dependant Mature mRNA	5	33	0.273075	1.59397	0.20113	1	0.721475	1	NUPL1; RANBP2; RAE1; SEH1L; NUP188;
IL2-mediated signaling events	14	115	0.76461	1.27936	0.203822	1	0.72956	1	CCND2; FOXO3; IKZF3; KRAS; MAPK1; SOS1; BCL2; CDK6; ERC1; MAP2K1; CCND3; GAB2; PTPN11; RELA;
JNK signaling in the CD4+ TCR pathway	6	42	0.32769	1.50249	0.206379	1	0.734612	1	RCAN1; DBNL; FOSL1; GRAP2; POU2F1; RCAN2;
FOXM1 transcription factor network	6	42	0.32769	1.50249	0.206379	1	0.734612	1	RB1; CCND1; GAS1; HSPA1B; MAP2K1; CCNE1;
Nef mediated downregulation of MHC class I complex cell surface expression	2	9	0.10923	2.34293	0.208757	1	0.734612	1	AP1B1; PACS1;
N-Glycan antennae elongation	2	9	0.10923	2.34293	0.208757	1	0.734612	1	MGAT4A; ST8SIA3;
p38MAPK events	2	9	0.10923	2.34293	0.208757	1	0.734612	1	KRAS; RALGDS;
Sodium/Calcium exchangers	2	9	0.10923	2.34293	0.208757	1	0.734612	1	SLC24A4; SLC8A1;
Regulated proteolysis of p75NTR	2	9	0.10923	2.34293	0.208757	1	0.734612	1	ADAM17; RELA;
Role of Abl in Robo-Slit signaling	2	9	0.10923	2.34293	0.208757	1	0.734612	1	ABL2; ROBO1;
Nephrin/Neph1 signaling in the kidney podocyte	4	25	0.21846	1.68391	0.210272	1	0.738386	1	F2RL2; PLCG1; CD2AP; TJP1;
Syndecan-3-mediated signaling events	3	17	0.163845	1.85845	0.216073	1	0.752423	1	APH1A; EGFR; SDC3;
Beta5 beta6 beta7 and beta8 integrin cell surface interactions	3	17	0.163845	1.85845	0.216073	1	0.752423	1	EDIL3; FN1; ITGB8;
Activation of BH3-only proteins	3	17	0.163845	1.85845	0.216073	1	0.752423	1	YWHAB; BCL2; PPP3R1;
PKA activation in glucagon signalling	3	17	0.163845	1.85845	0.216073	1	0.752423	1	PRKACB; PRKAR1A; ADCY5;
Signaling by Insulin receptor	10	79	0.54615	1.33058	0.216961	1	0.753939	1	ATP6V1A; KRAS; MAPK1; SOS1; YWHAB; ATP6V1C2; MAP2K1; PPM1A; EIF4EBP1; PTPN11;
HIF-2-alpha transcription factor network	5	34	0.273075	1.54711	0.218728	1	0.758499	1	SIRT1; TCEB1; SLC11A2; SERPINE1; HIF1AN;
Coregulation of Androgen receptor activity	8	61	0.43692	1.37886	0.221559	1	0.766722	1	HNRNPA1; MED1; CCND1; CDK6; CTDSP2; CCND3; TCF4; ZMIZ1;
Cell-Cell communication	14	117	0.76461	1.25749	0.222191	1	0.76732	1	CDH1; NCAM1; DCC; LIMS1; CD47; CDH4; CTNND1; PARD6B; PVRL1; SPTBN2; CADM1; CD2AP; FERMT2; PTPN11;
S1P2 pathway	4	26	0.21846	1.61917	0.231199	1	0.796776	1	MAPK1; GNAI2; GNAO1; GNAQ;
Transport of Mature mRNA Derived from an Intronless Transcript	5	35	0.273075	1.50291	0.236775	1	0.812634	1	NUPL1; RANBP2; RAE1; SEH1L; NUP188;
HIV-1 Nef: Negative effector of Fas and TNF-alpha	5	35	0.273075	1.50291	0.236775	1	0.812634	1	BCL2; CASP2; CASP3; MAP2K7; RELA;
FOXA transcription factor networks	10	81	0.54615	1.29773	0.240102	1	0.822363	1	G6PC; NF1; NCOA3; AP1B1; HNF4A; POU2F1; CREB1; NFIA; NFIB; NR3C1;
Fatty Acyl-CoA Biosynthesis	3	18	0.163845	1.75526	0.242253	1	0.823626	1	ACSL3; ACSL1; ACSL4;
Tie2 Signaling	3	18	0.163845	1.75526	0.242253	1	0.823626	1	KRAS; SOS1; PTPN11;
CD28 dependent Vav1 pathway	3	18	0.163845	1.75526	0.242253	1	0.823626	1	PAK2; NCAM1; SPTBN2;
Activated TLR4 signalling	9	72	0.491535	1.31408	0.244388	1	0.823626	1	MAPK1; MAP2K1; CREB1; MAP2K7; PTPN11; RELA; RPS6KA1; TMEM189-UBE2V1; UBE2V1;
IRAK1 recruits IKK complex upon TLR7/8 or 9 stimulation	2	10	0.10923	2.10887	0.245409	1	0.823626	1	TMEM189-UBE2V1; UBE2V1;
p130Cas linkage to MAPK signaling for integrins	2	10	0.10923	2.10887	0.245409	1	0.823626	1	RAP1B; PTK2;
DCC mediated attractive signaling	2	10	0.10923	2.10887	0.245409	1	0.823626	1	DCC; PTK2;
