# Supplementary material for: microRNA-1246 Is an Exosomal Biomarker for Aggressive Prostate Cancer
Source: Oxford University Press journal article supplement (doi:10.1158/0008-5472.can-17-2069), 2018-02-01
Supplement: 00085472can172069-sup-185977_2_supp_4531290_p36q52.docx [file 00085472can172069-sup-185977_2_supp_4531290_p36q52.docx]

| **Table S5 List of primers used for cloning of luciferase reporter constructs** | |
| --- | --- |
| **Primer** | **Sequence (5’-3’)** | |
| *CDH2*-1-1246-sense  *CDH2*-1-1246-antisense  Mutant *CDH2*-1-1246-sense  Mutant *CDH2*-1-1246-antisense  *CDH2*-2-1246-sense  *CDH2*-2-1246-antisense  Mutant *CDH2*-2-1246-sense  Mutant *CDH2*-2-1246-antisense  *VIM*-1246-sense  *VIM*-1246-antisense  Mutant *VIM*-1246-sense  Mutant *VIM*-1246-antisense  *ZEB1*-1246-sense  *ZEB1*-1246-antisense  Mutant *ZEB1*-1246-sense  Mutant *ZEB1*-1246-antisense | AAACTAGCGGCCGCTAGTGGAATATCAGTGATCCATATTAAAGAT  CTAGATCTTTAAGATTTGGTTCTCTGTTTTTCCACTAGCGGCCGCTAGTTT  AAACTAGCGGCCGCTAGTGGAATATGTGACTAAACCATCTTAAAGAT  CTAGATCTTTAAGATGGTTTAGTCACATATTCCACTAGCGGCCGCTAGTTT  AAACTAGCGGCCGCTAGTTTTGGTCTTAATCCATGTACACTTTTT  CTAGAAAAAGTGTACTTGGTTTTTGTCCTTTACTAGCGGCCGCTAGTTT    AAACTAGCGGCCGCTAGTTTTGGTCTTTCAGGCCTACACTTTTT  CTAGAAAAAGTGTAGGCCTGAAAGACCAAAACTAGCGGCCGCTAGTTT    AAACTAGCGGCCGCTAGTAATAAAAAAGAAATCCATATCTTAAAGT  CTAGACTTTAAGATATGGATTTCTTTTTTATTACTAGCGGCCGCTAGTTT  AAACTAGCGGCCGCTAGTAATAAAAAAGCACAAACGATCTTAAAGT  CTAGACTTTAAGATCGTTTGTGCTTTTTTATTACTAGCGGCCGCTAGTTT  AAACTAGCGGCCGCTAGTCTAATCTGCTTTATCCATGTACTTGCATT  CTAGAATGCAAGTACATGGATAAAGCAGATTAGACTAGCGGCCGCTAGTTT  AAACTAGCGGCCGCTAGTCTAATCTGCTTTTAAAGCGTACTTGCATT  CTAGATGCAAGTACGCTTTAAAAGCAGATTAGAACTAGCGGCCGCTAGTTT | |
